# Supplementary material for: New secondary phosphate mineral occurrences and their crystal chemistry, at the Hagendorf Süd pegmatite, Bavaria
Source: Copernicus journal article supplement (doi:10.5194/ejm-34-439-2022), 2022-10-10

## checkCIF/PLATON report

You have not supplied any structure factors. As a result the full set of tests cannot be run.

THIS REPORT IS FOR GUIDANCE ONLY. IF USED AS PART OF A REVIEW PROCEDURE FOR PUBLICATION, IT SHOULD NOT REPLACE THE EXPERTISE OF AN EXPERIENCED CRYSTALLOGRAPHIC REFEREE.

No syntax errors found.      CIF dictionary      Interpreting this report

### Datablock: I

---

Bond precision:    P- O = 0.0030 A                      Wavelength=0.71075

Cell:                      a=13.983 (3)              b=5.207 (1)              c=12.200 (2)  
                                alpha=90              beta=98.84 (3)              gamma=90

Temperature:              100 K

|                        | Calculated              | Reported         |
|------------------------|-------------------------|------------------|
| Volume                 | 877.7 (3)               | 877.7 (3)        |
| Space group            | P 2/a                   | P 1 2/a 1        |
| Hall group             | -P 2ya                  | -P 2ya           |
| Moiety formula         | Fe7.86 Mn6 O44 P8, 4(O) | ?                |
| Sum formula            | Fe7.86 Mn6 O48 P8       | Fe2 Mn1.5 O12 P2 |
| Mr                     | 1784.60                 | 453.10           |
| Dx, g cm <sup>-3</sup> | 3.376                   | 3.429            |
| Z                      | 1                       | 4                |
| Mu (mm <sup>-1</sup> ) | 5.743                   | 5.798            |
| F000                   | 858.5                   | 858.0            |
| F000'                  | 864.46                  |                  |
| h, k, lmax             | 20, 7, 18               | 18, 7, 17        |
| Nref                   | 3047                    | 1812             |
| Tmin, Tmax             | 0.757, 0.891            | 0.700, 0.900     |
| Tmin'                  | 0.528                   |                  |

Correction method= # Reported T Limits: Tmin=0.700 Tmax=0.900  
AbsCorr = MULTI-SCAN

Data completeness= 0.595                      Theta(max)= 31.980

R(reflections)= 0.0425 ( 1269)                      wR2(reflections)=  
S = 1.660                      Npar= 168                      wR= 0.0526 ( 1812)

---

The following ALERTS were generated. Each ALERT has the format  
**test-name\_ALERT\_alert-type\_alert-level.**

Click on the hyperlinks for more details of the test.

---

### Alert level B

PLAT043\_ALERT\_1\_B Calculated and Reported Mol. Weight Differ by .. 27.80 Check  
PLAT113\_ALERT\_2\_B ADDSYM Suggests Possible Pseudo/New Space Group C2/m Check  
Note: (Pseudo) Lattice Translation Implemented

---

### Alert level C

ABSTY02\_ALERT\_1\_C An \_exptl\_absorpt\_correction\_type has been given without  
a literature citation. This should be contained in the  
\_exptl\_absorpt\_process\_details field.  
Absorption correction given as multi-scan  
CHEMW01\_ALERT\_1\_C The ratio of given/expected molecular weight as calculated  
from the \_chemical\_formula\_sum lies outside  
the range 0.99 <> 1.01  
Calculated formula weight = 448.0413  
Formula weight given = 453.1000  
PLAT041\_ALERT\_1\_C Calc. and Reported SumFormula Strings Differ Please Check  
PLAT077\_ALERT\_4\_C Unitcell Contains Non-integer Number of Atoms .. Please Check  
PLAT202\_ALERT\_3\_C Isotropic non-H Atoms in Anion/Solvent ..... 1 Check  
O12A  
PLAT213\_ALERT\_2\_C Atom O5 has ADP max/min Ratio ..... 3.5 prolat  
PLAT213\_ALERT\_2\_C Atom O7 has ADP max/min Ratio ..... 3.1 prolat  
PLAT250\_ALERT\_2\_C Large U3/U1 Ratio for Average U(i,j) Tensor .... 2.5 Note

---

### Alert level G

FORMU01\_ALERT\_2\_G There is a discrepancy between the atom counts in the  
\_chemical\_formula\_sum and the formula from the \_atom\_site\* data.  
Atom count from \_chemical\_formula\_sum: Fe2 Mn1.5 O12 P2  
Atom count from the \_atom\_site data: Fe1.966 Mn1.5 O12 P2  
ABSMU01\_ALERT\_1\_G Calculation of \_exptl\_absorpt\_correction\_mu  
not performed for this radiation type.  
CELLZ01\_ALERT\_1\_G Difference between formula and atom\_site contents detected.  
CELLZ01\_ALERT\_1\_G ALERT: check formula stoichiometry or atom site occupancies.  
From the CIF: \_cell\_formula\_units\_Z 4  
From the CIF: \_chemical\_formula\_sum Fe2 Mn1.5 O12 P2  
TEST: Compare cell contents of formula and atom\_site data

| atom | Z*formula | cif sites | diff |
|------|-----------|-----------|------|
| Fe   | 8.00      | 7.86      | 0.14 |
| Mn   | 6.00      | 6.00      | 0.00 |
| O    | 48.00     | 48.00     | 0.00 |
| P    | 8.00      | 8.00      | 0.00 |

PLAT004\_ALERT\_5\_G Polymeric Structure Found with Maximum Dimension 3 Info  
PLAT005\_ALERT\_5\_G No Embedded Refinement Details Found in the CIF Please Do !  
PLAT045\_ALERT\_1\_G Calculated and Reported Z Differ by a Factor ... 0.250 Check  
PLAT068\_ALERT\_1\_G Reported F000 Differs from Calcd (or Missing)... Please Check  
PLAT110\_ALERT\_2\_G ADDSYM Detects Potential Lattice Translation ... ? Check  
PLAT112\_ALERT\_2\_G ADDSYM Detects New (Pseudo) Symm. Elem C 100 %Fit  
PLAT301\_ALERT\_3\_G Main Residue Disorder .....(Resd 1 ) 11% Note

|                   |                                                  |              |
|-------------------|--------------------------------------------------|--------------|
| PLAT302_ALERT_4_G | Anion/Solvent/Minor-Residue Disorder (Resd 2 )   | 100% Note    |
| PLAT302_ALERT_4_G | Anion/Solvent/Minor-Residue Disorder (Resd 3 )   | 100% Note    |
| PLAT311_ALERT_2_G | Isolated Disordered Oxygen Atom (No H's ?) ..... | 012A Check   |
| PLAT311_ALERT_2_G | Isolated Disordered Oxygen Atom (No H's ?) ..... | 012B Check   |
| PLAT794_ALERT_5_G | Tentative Bond Valency for Fe1 (III) .           | 3.08 Info    |
| PLAT794_ALERT_5_G | Tentative Bond Valency for Mn1 (II) .            | 2.19 Info    |
| PLAT794_ALERT_5_G | Tentative Bond Valency for Mn2 (II) .            | 2.11 Info    |
| PLAT808_ALERT_5_G | No Parseable SHELXL Style Weighting Scheme Found | Please Check |
| PLAT883_ALERT_1_G | No Info/Value for _atom_sites_solution_primary . | Please Do !  |
| PLAT950_ALERT_5_G | Calculated (ThMax) and CIF-Reported Hmax Differ  | 2 Units      |
| PLAT966_ALERT_5_G | Note: Non-Standard (i.e. 2.0) OMIT Threshold of  | 3.0 Sig(I)   |

---

0 **ALERT level A** = Most likely a serious problem - resolve or explain  
 2 **ALERT level B** = A potentially serious problem, consider carefully  
 8 **ALERT level C** = Check. Ensure it is not caused by an omission or oversight  
 22 **ALERT level G** = General information/check it is not something unexpected

10 ALERT type 1 CIF construction/syntax error, inconsistent or missing data  
 9 ALERT type 2 Indicator that the structure model may be wrong or deficient  
 2 ALERT type 3 Indicator that the structure quality may be low  
 3 ALERT type 4 Improvement, methodology, query or suggestion  
 8 ALERT type 5 Informative message, check

---

## Validation response form

Please find below a validation response form (VRF) that can be filled in and pasted into your CIF.

```
# start Validation Reply Form
_vrf_ABSTY02_I
;
PROBLEM: An _exptl_absorpt_correction_type has been given without
RESPONSE: ...
;
_vrf_CHEMW01_I
;
PROBLEM: The ratio of given/expected molecular weight as calculated
RESPONSE: ...
;
_vrf_PLAT043_I
;
PROBLEM: Calculated and Reported Mol. Weight Differ by ..      27.80 Check
RESPONSE: ...
;
_vrf_PLAT113_I
;
PROBLEM: ADDSYM Suggests Possible Pseudo/New Space Group      C2/m Check
RESPONSE: ...
;
_vrf_PLAT041_I
;
PROBLEM: Calc. and Reported SumFormula Strings Differ      Please Check
RESPONSE: ...
;
_vrf_PLAT077_I
;
```

```

PROBLEM: Unitcell Contains Non-integer Number of Atoms ..      Please Check
RESPONSE: ...
;
_vrf_PLAT202_I
;
PROBLEM: Isotropic non-H Atoms in Anion/Solvent .....      1 Check
RESPONSE: ...
;
_vrf_PLAT213_I
;
PROBLEM: Atom O5          has ADP max/min Ratio .....      3.5 prolat
RESPONSE: ...
;
_vrf_PLAT250_I
;
PROBLEM: Large U3/U1 Ratio for Average U(i,j) Tensor ....      2.5 Note
RESPONSE: ...
;
# end Validation Reply Form

```

---

It is advisable to attempt to resolve as many as possible of the alerts in all categories. Often the minor alerts point to easily fixed oversights, errors and omissions in your CIF or refinement strategy, so attention to these fine details can be worthwhile. In order to resolve some of the more serious problems it may be necessary to carry out additional measurements or structure refinements. However, the purpose of your study may justify the reported deviations and the more serious of these should normally be commented upon in the discussion or experimental section of a paper or in the "special\_details" fields of the CIF. checkCIF was carefully designed to identify outliers and unusual parameters, but every test has its limitations and alerts that are not important in a particular case may appear. Conversely, the absence of alerts does not guarantee there are no aspects of the results needing attention. It is up to the individual to critically assess their own results and, if necessary, seek expert advice.

### Publication of your CIF in IUCr journals

A basic structural check has been run on your CIF. These basic checks will be run on all CIFs submitted for publication in IUCr journals (*Acta Crystallographica*, *Journal of Applied Crystallography*, *Journal of Synchrotron Radiation*); however, if you intend to submit to *Acta Crystallographica Section C* or *E* or *IUCrData*, you should make sure that full publication checks are run on the final version of your CIF prior to submission.

### Publication of your CIF in other journals

Please refer to the *Notes for Authors* of the relevant journal for any special instructions relating to CIF submission.

---

Datablock I - ellipsoid plot

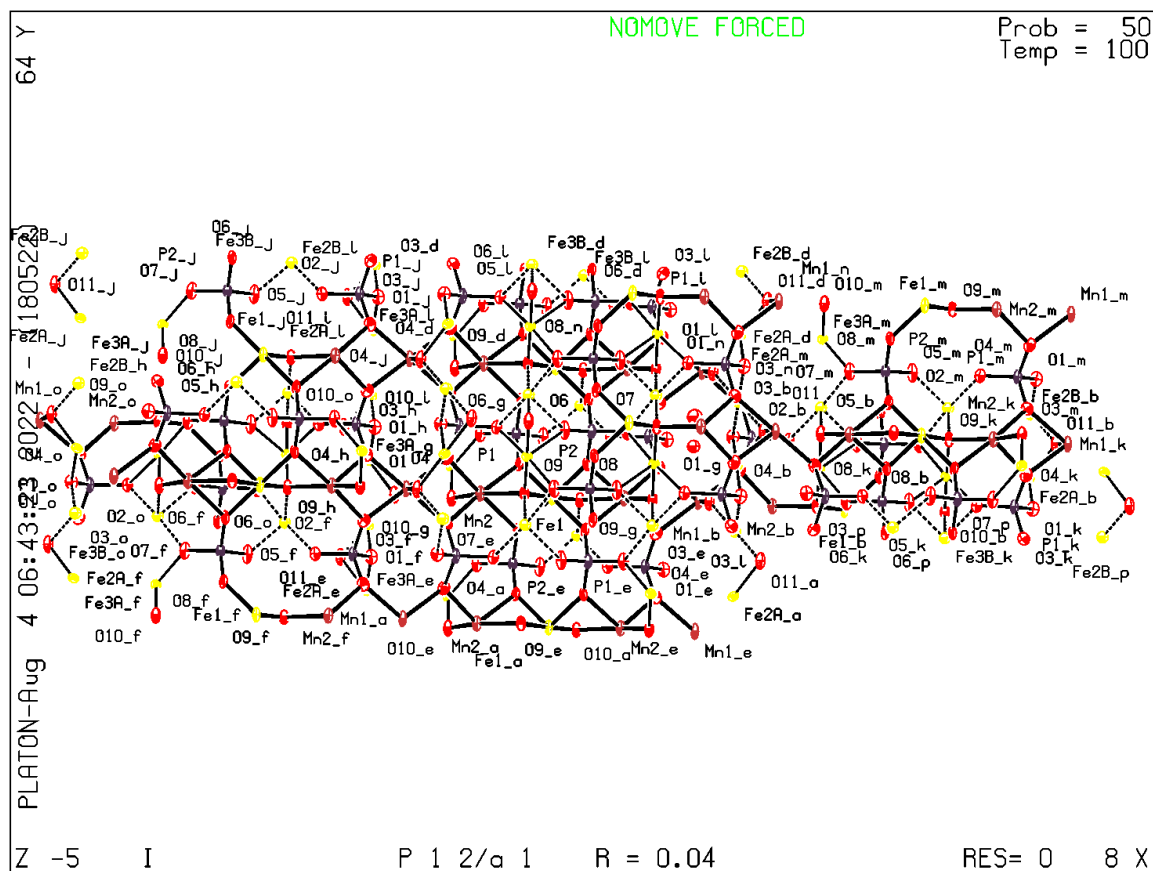

Supplement: Supplementary file 1 [file ejm-34-439-2022-supplement.zip › checkcif.pdf]
