# Supplementary material for: New secondary phosphate mineral occurrences and their crystal chemistry, at the Hagendorf Süd pegmatite, Bavaria
Source: Copernicus journal article supplement (doi:10.5194/ejm-34-439-2022), 2022-10-10
Supplement: Supplementary file 1 [file ejm-34-439-2022-supplement.zip]

Archive with 3 entries (3 files):
- hag510_kenn_4aug.cif
- ejm-34-439-2022-supplement-title-page.pdf
- checkcif.pdf
