# Supplementary material for: New secondary phosphate mineral occurrences and their crystal chemistry, at the Hagendorf Süd pegmatite, Bavaria
Source: Copernicus journal article supplement (doi:10.5194/ejm-34-439-2022), 2022-10-10
Supplement: Supplementary file 1 [file ejm-34-439-2022-supplement.zip › ejm-34-439-2022-supplement-title-page.pdf]

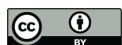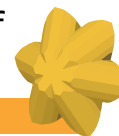

*Supplement of*

**New secondary phosphate mineral occurrences and their crystal chemistry, at the Hagendorf Süd pegmatite, Bavaria**

**Erich Keck et al.**

*Correspondence to:* Ian E. Grey ([ian.grey@csiro.au](mailto:ian.grey@csiro.au))

- [ejm-34-439-2022-supplement-title-page.pdf](#)
- [checkcif.pdf](#)
- [hag510\\_kenn\\_4aug.cif](#)

The copyright of individual parts of the supplement might differ from the article licence.
