# Supplementary material for: New secondary phosphate mineral occurrences and their crystal chemistry, at the Hagendorf Süd pegmatite, Bavaria
Source: Copernicus journal article supplement (doi:10.5194/ejm-34-439-2022), 2022-10-10
Supplement: Supplementary file 1 [file ejm-34-439-2022-supplement.zip › hag510_kenn_4aug.cif]

#=======================================================================
data_global
#=======================================================================

_audit_creation_method                   'Jana2006 Version : 25/03/2021'


# 1. PROCESSING SUMMARY (IUCr Office Use Only)

_journal_date_recd_electronic            ?
_journal_date_to_coeditor                ?
_journal_date_from_coeditor              ?
_journal_date_accepted                   ?
_journal_date_printers_first             ?
_journal_date_printers_final             ?
_journal_date_proofs_out                 ?
_journal_date_proofs_in                  ?
_journal_coeditor_name                   ?
_journal_coeditor_code                   ?
_journal_coeditor_notes
; ?
;
_journal_techeditor_code                 ?
_journal_paper_category                  ?
_journal_techeditor_notes
; ?
;
_journal_coden_ASTM                      ?
_journal_name_full                       'Acta Crystallographica Section C'
_journal_year                            ?
_journal_volume                          ?
_journal_issue                           ?
_journal_page_first                      ?
_journal_page_last                       ?
_journal_suppl_publ_number               ?
_journal_suppl_publ_pages                ?

#=======================================================================

# 2. SUBMISSION DETAILS

_publ_contact_author_name                ?
_publ_contact_author_address
; ?
;
_publ_contact_author_email               ?
_publ_contact_author_fax                 ?
_publ_contact_author_phone               ?

_publ_requested_journal                  'Acta Crystallographica Section C'
_publ_requested_category                 ?

_publ_contact_letter
; ?
;

#=======================================================================

# 3. TITLE AND AUTHOR LIST

_publ_section_title
; ?
;
_publ_section_title_footnote
; ?
;
loop_
 _publ_author_name
 _publ_author_footnote
 _publ_author_address
; ?      # name
;
; ?      # footnote
;
; ?      # address
;

#=======================================================================

# 4. TEXT

_publ_section_synopsis
; ?
;
_publ_section_abstract
; ?
;
_publ_section_comment
; ?
;
_publ_section_introduction
; ?
;
_publ_section_experimental
; ?
;
_publ_section_exptl_prep
; ?
;
_publ_section_exptl_refinement
; ?
;
_publ_section_exptl_solution
; ?
;
_publ_section_discussion
; ?
;
_publ_section_acknowledgements
; ?
;
_publ_section_references
;
Petricek, V., Dusek, M. & Palatinus L. (2014). Z. Kristallogr. 229(5), 345-352.

Palatinus L. & Chapuis G. (2007). J. Appl. Cryst. 40, 786-790.

# enable this reference if Diamond ver. 2 was used for visualization
#Brandenburg, K. (1999). DIAMOND. Version. 2.1c.
#Crystal Impact GbR, Bonn, Germany.

# enable this reference if Diamond ver. 3 was used for visualization
#Brandenburg, K. & Putz, H. (2005). DIAMOND Version 3.
#Crystal Impact GbR, Postfach 1251, D-53002 Bonn, Germany.

# enable this reference if SIR97 was used for solving of the structure
#Altomare, A., Burla, M. C., Camalli, M., Cascarano, G., Giacovazzo, C.,
#Guagliardi, A., Moliterni, A. G. G., Polidori, G., Spagna, R. (1997).
#SIR97. A Package for Crystal Structure Solution by Direct Methods
#and Refinement, Bari, Rome, Italy.

# use this reference if SIR2002 was used for solving of the structure
#Burla, M.C., Camalli, M., Carrozzini, B., Cascarano, G., Giacovazzo, C.,
#Polidori, G., Spagna, R.
#SIR2002: the program, J. Appl. Cryst, (2003). 36, 1103


# use this reference if SIR2011 was used for solving of the structure
#Burla, M.C., Caliandro, R., Camalli, M., Carrozzini, B., Cascarano,
#G.L., Giacovazzo, C., Mallamo. M., Mazzone, A., Polidori, G., Spagna, R.
#SIR2011: a new package for crystal structure determination and refinement,
#J.Appl.Cryst. (2012) 45, 357-361

# enable this reference if bond valences were calculated
#Brown, I. D. (1996). J. Appl. Cryst. 29, 479-480.

# enable this reference if Xshape wase used for crystal shape refinement
#Stoe & Cie (1998). X-SHAPE. Stoe & Cie, Darmstadt, Germany.


# enable this reference if Flack coefficient was refined
#Flack, H. D. (1983). Acta Cryst. A39, 876-881.
;
_publ_section_figure_captions
; ?
;
_publ_section_table_legends
; ?
;

#=======================================================================
data_I
#=======================================================================

# 5. CHEMICAL DATA

_chemical_name_systematic
; ?
;
_chemical_name_common                    ?
_chemical_formula_moiety                 ?
_chemical_formula_structural             ?
_chemical_formula_analytical             ?
_chemical_formula_iupac                  ?
_chemical_formula_sum                    'Fe2 Mn1.5 O12 P2'
_chemical_formula_weight                 453.1
_chemical_melting_point                  ?
_chemical_compound_source                ?
_chemical_absolute_configuration         .

#=======================================================================

# 6. CRYSTAL DATA

_symmetry_cell_setting                   monoclinic
_symmetry_space_group_name_H-M           'P 1 2/a 1'
_symmetry_space_group_name_Hall          '-P 2ya'
_symmetry_Int_Tables_number              13

loop_
 _space_group_symop_id
 _space_group_symop_operation_xyz
 1   x,y,z
 2   -x+1/2,y,-z
 3   -x,-y,-z
 4   x+1/2,-y,z

_cell_length_a                           13.983(3)
_cell_length_b                           5.2070(10)
_cell_length_c                           12.200(2)
_cell_angle_alpha                        90
_cell_angle_beta                         98.84(3)
_cell_angle_gamma                        90
_cell_volume                             877.7(3)

loop_
 _twin_individual_id
 _twin_individual_mass_fraction_refined
 _twin_individual_twin_matrix_11
 _twin_individual_twin_matrix_12
 _twin_individual_twin_matrix_13
 _twin_individual_twin_matrix_21
 _twin_individual_twin_matrix_22
 _twin_individual_twin_matrix_23
 _twin_individual_twin_matrix_31
 _twin_individual_twin_matrix_32
 _twin_individual_twin_matrix_33
 ? ? ? ? ? ? ? ? ? ? ?

_cell_formula_units_Z                    4

_cell_measurement_reflns_used            14307
_cell_measurement_theta_min              1.69
_cell_measurement_theta_max              31.98
_cell_measurement_temperature            100
_cell_special_details
; ?
;

_exptl_crystal_density_diffrn            3.4286
_exptl_crystal_density_meas              ?
_exptl_crystal_density_method            ?
_exptl_crystal_F_000                     858

_exptl_absorpt_coefficient_mu            5.798
_exptl_crystal_description               'lath'
_exptl_crystal_size_max                  0.11
_exptl_crystal_size_mid                  0.04
_exptl_crystal_size_min                  0.02
_exptl_crystal_size_rad                  ?
_exptl_crystal_colour                    ?
_exptl_absorpt_correction_type           'multi-scan'
_exptl_absorpt_process_details           ?
_exptl_absorpt_correction_T_min          0.70
_exptl_absorpt_correction_T_max          0.90
loop_
 _exptl_crystal_face_index_h
 _exptl_crystal_face_index_k
 _exptl_crystal_face_index_l
 _exptl_crystal_face_perp_dist
 ? ? ? ?

#=======================================================================

# 7. EXPERIMENTAL DATA

_exptl_special_details                   ?

_diffrn_ambient_temperature              100
_diffrn_source                           ?
_diffrn_source_power                     ?
_diffrn_source_voltage                   ?
_diffrn_source_current                   ?
_diffrn_radiation_type                   'synchrotron'
_diffrn_radiation_source                 'synchrotron'
_diffrn_radiation_wavelength             0.71075
_diffrn_radiation_monochromator          ?
_diffrn_measurement_device               'image plate'
_diffrn_measurement_device_type          ?
_diffrn_detector                         ?
_diffrn_detector_area_resol_mean         ?
_diffrn_measurement_method               ?
_diffrn_measurement_specimen_support     ?

_diffrn_reflns_number                    14307
_diffrn_reflns_theta_min                 1.69
_diffrn_reflns_theta_max                 31.98
_diffrn_reflns_theta_full                28.92
_diffrn_measured_fraction_theta_max      0.85
_diffrn_measured_fraction_theta_full     0.98
_diffrn_reflns_av_R_equivalents          0.0793
_diffrn_reflns_av_unetI/netI             0.0422
_diffrn_reflns_limit_h_min               -18
_diffrn_reflns_limit_h_max               18
_diffrn_reflns_limit_k_min               -7
_diffrn_reflns_limit_k_max               7
_diffrn_reflns_limit_l_min               -17
_diffrn_reflns_limit_l_max               17
_diffrn_reflns_reduction_process         ?

_diffrn_standards_number                 ?
_diffrn_standards_interval_count         ?
_diffrn_standards_interval_time          ?
_diffrn_standards_decay_%                ?
loop_
_diffrn_standard_refln_index_h
_diffrn_standard_refln_index_k
_diffrn_standard_refln_index_l
  ? ? ?

_diffrn_radiation_probe                  X-ray

#=======================================================================

# 8. REFINEMENT DATA

_refine_special_details
; ?
;

_reflns_number_total                     1812
_reflns_number_gt                        1269
_reflns_threshold_expression             'I>3\s(I)'

_refine_ls_structure_factor_coef         F
_refine_ls_R_factor_gt                   0.0425
_refine_ls_wR_factor_gt                  0.0488
_refine_ls_R_factor_all                  0.0612
_refine_ls_wR_factor_ref                 0.0526
_refine_ls_goodness_of_fit_ref           1.66
_refine_ls_goodness_of_fit_gt            1.88
_refine_ls_restrained_S_gt               ?
_refine_ls_restrained_S_all              ?
_refine_ls_number_reflns                 1812
_refine_ls_number_parameters             168
_refine_ls_number_restraints             0
_refine_ls_number_constraints            0
_refine_ls_weighting_scheme              sigma
_refine_ls_weighting_details             'w=1/(\s^2^(F)+0.0001F^2^)'
_refine_ls_hydrogen_treatment            'constr'
_refine_ls_shift/su_max                  0.0112
_refine_ls_shift/su_mean                 0.0010
_refine_diff_density_max                 1.14
_refine_diff_density_min                 -0.67
_refine_ls_extinction_method             'none'
_refine_ls_extinction_coef               ?
_refine_ls_extinction_expression         ?
_refine_ls_abs_structure_details         ?
_refine_ls_abs_structure_Flack           ?
_refine_ls_abs_structure_Rogers          ?

loop_
 _atom_type_symbol
 _atom_type_scat_dispersion_real
 _atom_type_scat_dispersion_imag
 _atom_type_scat_source
 Fe   0.3463  0.8444
 'International Tables Vol C tables 4.2.6.8 and 6.1.1.1'
 H    0.0000  0.0000
 'International Tables Vol C tables 4.2.6.8 and 6.1.1.1'
 Mn   0.3368  0.7283
 'International Tables Vol C tables 4.2.6.8 and 6.1.1.1'
 O    0.0106  0.0060
 'International Tables Vol C tables 4.2.6.8 and 6.1.1.1'
 P    0.1023  0.0942
 'International Tables Vol C tables 4.2.6.8 and 6.1.1.1'

_computing_data_collection               ?
_computing_cell_refinement               ?
_computing_data_reduction                ?
_computing_structure_solution            ?
_computing_structure_refinement          ?
_computing_molecular_graphics            ?
_computing_publication_material          ?

loop_
 _restr_distance_atom_site_label_1
 _restr_distance_site_symmetry_1
 _restr_distance_atom_site_label_2
 _restr_distance_site_symmetry_2
 _restr_distance_target
 _restr_distance_target_weight_param
 ? ? ? ? ? ?

loop_
 _restr_angle_atom_site_label_1
 _restr_angle_site_symmetry_1
 _restr_angle_atom_site_label_2
 _restr_angle_site_symmetry_2
 _restr_angle_atom_site_label_3
 _restr_angle_site_symmetry_3
 _restr_angle_target
 _restr_angle_target_weight_param
 ? ? ? ? ? ? ? ?

loop_
 _restr_torsion_atom_site_label_1
 _restr_torsion_site_symmetry_1
 _restr_torsion_atom_site_label_2
 _restr_torsion_site_symmetry_2
 _restr_torsion_atom_site_label_3
 _restr_torsion_site_symmetry_3
 _restr_torsion_atom_site_label_4
 _restr_torsion_site_symmetry_4
 _restr_torsion_angle_target
 _restr_torsion_weight_param
 ? ? ? ? ? ? ? ? ? ?

loop_
 _restr_equal_distance_atom_site_label_1
 _restr_equal_distance_site_symmetry_1
 _restr_equal_distance_atom_site_label_2
 _restr_equal_distance_site_symmetry_2
 _restr_equal_distance_class_class_id
 _restr_equal_distance_class_target_weight_param
 ? ? ? ? ? ?

loop_
 _restr_equal_angle_atom_site_label_1
 _restr_equal_angle_site_symmetry_1
 _restr_equal_angle_atom_site_label_2
 _restr_equal_angle_site_symmetry_2
 _restr_equal_angle_atom_site_label_3
 _restr_equal_angle_site_symmetry_3
 _restr_equal_angle_class_class_id
 _restr_equal_angle_class_target_weight_param
 ? ? ? ? ? ? ? ?

loop_
 _restr_equal_torsion_atom_site_label_1
 _restr_equal_torsion_site_symmetry_1
 _restr_equal_torsion_atom_site_label_2
 _restr_equal_torsion_site_symmetry_2
 _restr_equal_torsion_atom_site_label_3
 _restr_equal_torsion_site_symmetry_3
 _restr_equal_torsion_atom_site_label_4
 _restr_equal_torsion_site_symmetry_4
 _restr_equal_torsion_class_class_id
 _restr_equal_torsion_class_target_weight_param
 ? ? ? ? ? ? ? ? ? ?


#=======================================================================

# 9. ATOMIC COORDINATES AND DISPLACEMENT PARAMETERS

loop_
 _atom_site_label
 _atom_site_type_symbol
 _atom_site_fract_x
 _atom_site_fract_y
 _atom_site_fract_z
 _atom_site_adp_type
 _atom_site_U_iso_or_equiv
 _atom_site_site_symmetry_multiplicity
 _atom_site_occupancy
 _atom_site_calc_flag
 _atom_site_refinement_flags
 _atom_site_disorder_assembly
 _atom_site_disorder_group
  Fe1 Fe 0.25 0.24048(11) 0.5 Uani 0.0210(2) 2 1 d . . .
  Fe2a Fe 0.5 0.5 0 Uani 0.0165(2) 2 0.732(2) d . . .
  Fe2b Fe 0.5 1 0 Uiso 0.0215(7) 2 0.268(2) d . . .
  Fe3a Fe 0.54749(5) 0.48602(11) 0.30695(5) Uani 0.01628(16) 4 0.7285(17) d . . .
  Fe3b Fe 0.45189(15) 0.9888(4) 0.69275(16) Uiso 0.0196(6) 4 0.2375(17) d . . .
  Mn1 Mn 0.25 0.25800(11) 1 Uani 0.0205(2) 2 1 d . . .
  Mn2 Mn 0.21337(5) 0.25159(8) 0.72710(5) Uani 0.0228(2) 4 1 d . . .
  P1 P 0.31335(8) 0.74872(13) 0.85663(8) Uani 0.0195(3) 4 1 d . . .
  P2 P 0.38185(7) 0.73891(13) 0.43929(8) Uani 0.0188(3) 4 1 d . . .
  O1 O 0.3916(2) 0.7453(3) 0.9601(3) Uani 0.0215(8) 4 1 d . . .
  O2 O 0.3564(2) 0.7443(3) 0.7500(2) Uani 0.0191(7) 4 1 d . . .
  O3 O 0.25483(18) 0.9988(5) 0.86143(19) Uani 0.0210(6) 4 1 d . . .
  O4 O 0.24956(19) 0.5090(5) 0.8617(2) Uani 0.0237(7) 4 1 d . . .
  O5 O 0.4358(2) 0.7316(4) 0.5589(2) Uani 0.0254(8) 4 1 d . . .
  O6 O 0.31987(19) 0.9877(5) 0.42060(18) Uani 0.0218(7) 4 1 d . . .
  O7 O 0.4506(2) 0.7403(4) 0.3531(2) Uani 0.0229(8) 4 1 d . . .
  O8 O 0.31712(18) 0.4958(4) 0.41874(18) Uani 0.0207(6) 4 1 d . . .
  O9 O 0.3481(2) 0.2456(4) 0.6452(3) Uani 0.0237(8) 4 1 d . . .
  O10 O 0.4371(2) 0.2305(4) 0.2526(2) Uani 0.0242(8) 4 1 d . . .
  O11 O 0.5925(3) 0.7668(4) -0.0419(3) Uani 0.0273(9) 4 1 d . . .
  O12a O 0.5094(3) 0.6378(7) 0.1540(3) Uiso 0.0250(8) 4 0.746(6) d . . .
  O12b O 0.5060(10) 0.866(2) 0.1509(12) Uiso 0.037(3) 4 0.254(6) d . . .

loop_
 _atom_site_aniso_label
 _atom_site_aniso_type_symbol
 _atom_site_aniso_U_11
 _atom_site_aniso_U_22
 _atom_site_aniso_U_33
 _atom_site_aniso_U_12
 _atom_site_aniso_U_13
 _atom_site_aniso_U_23
 Fe1 Fe 0.0178(4) 0.0357(4) 0.0105(4) 0 0.0053(3) 0
 Fe2a Fe 0.0180(4) 0.0140(4) 0.0172(4) 0.0032(3) 0.0013(3) -0.0016(3)
 Fe3a Fe 0.0168(3) 0.0151(3) 0.0171(3) 0.00127(19) 0.00296(18) 0.00132(19)
 Mn1 Mn 0.0129(4) 0.0415(5) 0.0063(4) 0 -0.0013(3) 0
 Mn2 Mn 0.0186(4) 0.0375(3) 0.0128(3) 0.00055(15) 0.0039(2) 0.00052(15)
 P1 P 0.0130(5) 0.0365(5) 0.0091(4) 0.0008(2) 0.0022(3) 0.0001(2)
 P2 P 0.0150(5) 0.0315(5) 0.0095(4) -0.0001(2) 0.0008(3) -0.0002(2)
 O1 O 0.0048(11) 0.0351(14) 0.0231(14) 0.0008(6) -0.0026(10) -0.0010(7)
 O2 O 0.0119(12) 0.0298(13) 0.0147(12) 0.0009(6) -0.0011(10) -0.0010(6)
 O3 O 0.0175(11) 0.0263(12) 0.0172(10) 0.0010(9) -0.0040(8) 0.0040(8)
 O4 O 0.0199(11) 0.0310(13) 0.0187(10) -0.0039(9) -0.0013(8) -0.0048(9)
 O5 O 0.0059(11) 0.0570(18) 0.0122(12) 0.0002(8) -0.0025(9) 0.0018(8)
 O6 O 0.0246(12) 0.0318(13) 0.0097(9) 0.0072(10) 0.0050(8) 0.0014(9)
 O7 O 0.0052(11) 0.0467(17) 0.0160(13) -0.0014(7) -0.0007(10) 0.0015(7)
 O8 O 0.0249(12) 0.0283(12) 0.0100(9) -0.0061(9) 0.0059(8) 0.0000(8)
 O9 O 0.0169(14) 0.0347(14) 0.0228(14) 0.0007(7) 0.0134(12) 0.0009(7)
 O10 O 0.0190(13) 0.0421(15) 0.0111(12) 0.0013(8) 0.0013(10) 0.0003(7)
 O11 O 0.0216(14) 0.0472(17) 0.0133(12) -0.0001(8) 0.0031(11) -0.0017(8)

loop_
 _jana_atom_site_ADP_C_label
 _jana_atom_site_ADP_C_type_symbol
 _jana_atom_site_ADP_C_111
 _jana_atom_site_ADP_C_112
 _jana_atom_site_ADP_C_113
 _jana_atom_site_ADP_C_122
 _jana_atom_site_ADP_C_123
 _jana_atom_site_ADP_C_133
 _jana_atom_site_ADP_C_222
 _jana_atom_site_ADP_C_223
 _jana_atom_site_ADP_C_233
 _jana_atom_site_ADP_C_333
 ? ? ? ? ? ? ? ? ? ? ? ?

loop_
 _jana_atom_site_ADP_D_label
 _jana_atom_site_ADP_D_type_symbol
 _jana_atom_site_ADP_D_1111
 _jana_atom_site_ADP_D_1112
 _jana_atom_site_ADP_D_1113
 _jana_atom_site_ADP_D_1122
 _jana_atom_site_ADP_D_1123
 _jana_atom_site_ADP_D_1133
 _jana_atom_site_ADP_D_1222
 _jana_atom_site_ADP_D_1223
 _jana_atom_site_ADP_D_1233
 _jana_atom_site_ADP_D_1333
 _jana_atom_site_ADP_D_2222
 _jana_atom_site_ADP_D_2223
 _jana_atom_site_ADP_D_2233
 _jana_atom_site_ADP_D_2333
 _jana_atom_site_ADP_D_3333
 ? ? ? ? ? ? ? ? ? ? ? ? ? ? ? ? ?

loop_
 _jana_atom_site_ADP_E_label
 _jana_atom_site_ADP_E_type_symbol
 _jana_atom_site_ADP_E_11111
 _jana_atom_site_ADP_E_11112
 _jana_atom_site_ADP_E_11113
 _jana_atom_site_ADP_E_11122
 _jana_atom_site_ADP_E_11123
 _jana_atom_site_ADP_E_11133
 _jana_atom_site_ADP_E_11222
 _jana_atom_site_ADP_E_11223
 _jana_atom_site_ADP_E_11233
 _jana_atom_site_ADP_E_11333
 _jana_atom_site_ADP_E_12222
 _jana_atom_site_ADP_E_12223
 _jana_atom_site_ADP_E_12233
 _jana_atom_site_ADP_E_12333
 _jana_atom_site_ADP_E_13333
 _jana_atom_site_ADP_E_22222
 _jana_atom_site_ADP_E_22223
 _jana_atom_site_ADP_E_22233
 _jana_atom_site_ADP_E_22333
 _jana_atom_site_ADP_E_23333
 _jana_atom_site_ADP_E_33333
 ? ? ? ? ? ? ? ? ? ? ? ? ? ? ? ? ? ? ? ? ? ? ?

loop_
 _jana_atom_site_ADP_F_label
 _jana_atom_site_ADP_F_type_symbol
 _jana_atom_site_ADP_F_111111
 _jana_atom_site_ADP_F_111112
 _jana_atom_site_ADP_F_111113
 _jana_atom_site_ADP_F_111122
 _jana_atom_site_ADP_F_111123
 _jana_atom_site_ADP_F_111133
 _jana_atom_site_ADP_F_111222
 _jana_atom_site_ADP_F_111223
 _jana_atom_site_ADP_F_111233
 _jana_atom_site_ADP_F_111333
 _jana_atom_site_ADP_F_112222
 _jana_atom_site_ADP_F_112223
 _jana_atom_site_ADP_F_112233
 _jana_atom_site_ADP_F_112333
 _jana_atom_site_ADP_F_113333
 _jana_atom_site_ADP_F_122222
 _jana_atom_site_ADP_F_122223
 _jana_atom_site_ADP_F_122233
 _jana_atom_site_ADP_F_122333
 _jana_atom_site_ADP_F_123333
 _jana_atom_site_ADP_F_133333
 _jana_atom_site_ADP_F_222222
 _jana_atom_site_ADP_F_222223
 _jana_atom_site_ADP_F_222233
 _jana_atom_site_ADP_F_222333
 _jana_atom_site_ADP_F_223333
 _jana_atom_site_ADP_F_233333
 _jana_atom_site_ADP_F_333333
 ? ? ? ? ? ? ? ? ? ? ? ? ? ? ? ? ? ? ? ? ? ? ? ? ? ? ? ? ? ?


#=======================================================================

# 10. MOLECULAR GEOMETRY


loop_
 _geom_bond_atom_site_label_1
 _geom_bond_atom_site_label_2
 _geom_bond_site_symmetry_1
 _geom_bond_site_symmetry_2
 _geom_bond_distance
 _geom_bond_publ_flag
  Fe1 Fe3a . 3_666 3.6802(18) ?
  Fe1 Fe3a . 4_465 3.6802(18) ?
  Fe1 Fe3b . 1_545 3.630(3) ?
  Fe1 Fe3b . 2_546 3.630(3) ?
  Fe1 Mn2 . . 2.8945(13) ?
  Fe1 Mn2 . 2_556 2.8945(13) ?
  Fe1 P2 . 1_545 3.3449(13) ?
  Fe1 P2 . . 3.3322(13) ?
  Fe1 P2 . 2_546 3.3449(13) ?
  Fe1 P2 . 2_556 3.3322(13) ?
  Fe1 O6 . 1_545 1.979(3) ?
  Fe1 O6 . 2_546 1.979(3) ?
  Fe1 O8 . . 1.979(3) ?
  Fe1 O8 . 2_556 1.979(3) ?
  Fe1 O9 . . 2.067(3) ?
  Fe1 O9 . 2_556 2.067(3) ?
  Fe2a Fe2b . 1_545 2.6035(10) ?
  Fe2a Fe2b . . 2.6035(10) ?
  Fe2a Fe3a . . 3.7021(17) ?
  Fe2a Fe3a . 3_665 3.7021(17) ?
  Fe2a Mn1 . 1_554 3.7159(13) ?
  Fe2a Mn1 . 3_666 3.7159(13) ?
  Fe2a P1 . 1_554 3.1852(17) ?
  Fe2a P1 . 3_666 3.1852(17) ?
  Fe2a O1 . 1_554 1.985(2) ?
  Fe2a O1 . 3_666 1.985(2) ?
  Fe2a O11 . . 2.017(3) ?
  Fe2a O11 . 3_665 2.017(3) ?
  Fe2a O12a . . 1.997(4) ?
  Fe2a O12a . 3_665 1.997(4) ?
  Fe2a O12b . . 2.641(13) ?
  Fe2a O12b . 3_665 2.641(13) ?
  Fe2b Fe3b . 1_554 3.706(2) ?
  Fe2b Fe3b . 3_676 3.706(2) ?
  Fe2b Mn1 . 1_564 3.7450(13) ?
  Fe2b Mn1 . 3_666 3.7450(13) ?
  Fe2b P1 . 1_554 3.1906(17) ?
  Fe2b P1 . 3_676 3.1906(17) ?
  Fe2b O1 . 1_554 2.017(2) ?
  Fe2b O1 . 3_676 2.017(2) ?
  Fe2b O11 . . 1.901(3) ?
  Fe2b O11 . 3_675 1.901(3) ?
  Fe2b O12a . . 2.651(4) ?
  Fe2b O12a . 3_675 2.651(4) ?
  Fe2b O12b . . 1.959(14) ?
  Fe2b O12b . 3_675 1.959(14) ?
  Fe3a Fe3b . 3_666 2.472(2) ?
  Fe3a Fe3b . 3_676 2.735(2) ?
  Fe3a Mn2 . 2_556 3.8081(17) ?
  Fe3a Mn2 . 3_666 3.6943(16) ?
  Fe3a P1 . 3_666 3.2337(17) ?
  Fe3a P2 . . 3.2946(16) ?
  Fe3a P2 . 3_666 3.3155(17) ?
  Fe3a O2 . 3_666 2.003(3) ?
  Fe3a O5 . 3_666 1.975(3) ?
  Fe3a O7 . . 2.035(3) ?
  Fe3a O9 . 3_666 2.041(3) ?
  Fe3a O10 . . 2.068(3) ?
  Fe3a O12a . . 2.021(4) ?
  Fe3a O12b . . 2.744(13) ?
  Fe3b Mn2 . 1_565 3.688(2) ?
  Fe3b Mn2 . 4_565 3.826(3) ?
  Fe3b P1 . . 3.241(3) ?
  Fe3b P2 . . 3.359(2) ?
  Fe3b P2 . 3_676 3.341(3) ?
  Fe3b O2 . . 2.043(3) ?
  Fe3b O5 . . 2.097(3) ?
  Fe3b O7 . 3_676 2.097(3) ?
  Fe3b O9 . 1_565 1.993(3) ?
  Fe3b O10 . 3_666 1.959(3) ?
  Fe3b O12a . 3_676 2.694(4) ?
  Fe3b O12b . 3_676 2.053(14) ?
  Mn1 Mn2 . . 3.2900(15) ?
  Mn1 Mn2 . 2_557 3.2900(15) ?
  Mn1 P1 . 1_545 3.3693(13) ?
  Mn1 P1 . . 3.2938(13) ?
  Mn1 P1 . 2_547 3.3693(13) ?
  Mn1 P1 . 2_557 3.2938(13) ?
  Mn1 O3 . 1_545 2.172(3) ?
  Mn1 O3 . 2_547 2.172(3) ?
  Mn1 O4 . . 2.134(3) ?
  Mn1 O4 . 2_557 2.134(3) ?
  Mn1 O11 . 3_666 2.187(4) ?
  Mn1 O11 . 4_466 2.187(4) ?
  Mn2 P1 . 1_545 3.2602(14) ?
  Mn2 P1 . . 3.2363(14) ?
  Mn2 P2 . 2_546 3.4912(14) ?
  Mn2 P2 . 2_556 3.3914(14) ?
  Mn2 O3 . 1_545 2.113(2) ?
  Mn2 O4 . . 2.120(3) ?
  Mn2 O6 . 2_546 2.257(2) ?
  Mn2 O8 . 2_556 2.175(2) ?
  Mn2 O9 . . 2.264(4) ?
  Mn2 O10 . 2_556 2.159(3) ?
  P1 O1 . . 1.539(3) ?
  P1 O2 . . 1.516(3) ?
  P1 O3 . . 1.544(3) ?
  P1 O4 . . 1.541(3) ?
  P2 O5 . . 1.537(3) ?
  P2 O6 . . 1.556(3) ?
  P2 O7 . . 1.530(3) ?
  P2 O8 . . 1.554(3) ?
  O12a O12b . . 1.188(13) ?

loop_
 _geom_angle_atom_site_label_1
 _geom_angle_atom_site_label_2
 _geom_angle_atom_site_label_3
 _geom_angle_site_symmetry_1
 _geom_angle_site_symmetry_2
 _geom_angle_site_symmetry_3
 _geom_angle
 _geom_angle_publ_flag
  Fe3a Fe1 Fe3a 3_666 . 4_465 134.47(2) ?
  Fe3a Fe1 Fe3b 3_666 . 1_545 43.93(3) ?
  Fe3a Fe1 Fe3b 3_666 . 2_546 178.40(3) ?
  Fe3a Fe1 Mn2 3_666 . . 67.15(3) ?
  Fe3a Fe1 Mn2 3_666 . 2_556 111.90(3) ?
  Fe3a Fe1 P2 3_666 . 1_545 92.74(3) ?
  Fe3a Fe1 P2 3_666 . . 56.17(2) ?
  Fe3a Fe1 P2 3_666 . 2_546 123.81(2) ?
  Fe3a Fe1 P2 3_666 . 2_556 87.36(3) ?
  Fe3a Fe1 O6 3_666 . 1_545 100.46(7) ?
  Fe3a Fe1 O6 3_666 . 2_546 109.47(7) ?
  Fe3a Fe1 O8 3_666 . . 71.53(7) ?
  Fe3a Fe1 O8 3_666 . 2_556 78.29(7) ?
  Fe3a Fe1 O9 3_666 . . 26.19(7) ?
  Fe3a Fe1 O9 3_666 . 2_556 152.55(7) ?
  Fe3a Fe1 Fe3b 4_465 . 1_545 178.40(3) ?
  Fe3a Fe1 Fe3b 4_465 . 2_546 43.93(3) ?
  Fe3a Fe1 Mn2 4_465 . . 111.90(3) ?
  Fe3a Fe1 Mn2 4_465 . 2_556 67.15(3) ?
  Fe3a Fe1 P2 4_465 . 1_545 123.81(2) ?
  Fe3a Fe1 P2 4_465 . . 87.36(3) ?
  Fe3a Fe1 P2 4_465 . 2_546 92.74(3) ?
  Fe3a Fe1 P2 4_465 . 2_556 56.17(2) ?
  Fe3a Fe1 O6 4_465 . 1_545 109.47(7) ?
  Fe3a Fe1 O6 4_465 . 2_546 100.46(7) ?
  Fe3a Fe1 O8 4_465 . . 78.29(7) ?
  Fe3a Fe1 O8 4_465 . 2_556 71.53(7) ?
  Fe3a Fe1 O9 4_465 . . 152.55(7) ?
  Fe3a Fe1 O9 4_465 . 2_556 26.19(7) ?
  Fe3b Fe1 Fe3b 1_545 . 2_546 137.67(5) ?
  Fe3b Fe1 Mn2 1_545 . . 67.76(4) ?
  Fe3b Fe1 Mn2 1_545 . 2_556 113.14(4) ?
  Fe3b Fe1 P2 1_545 . 1_545 57.40(4) ?
  Fe3b Fe1 P2 1_545 . . 91.34(4) ?
  Fe3b Fe1 P2 1_545 . 2_546 88.56(4) ?
  Fe3b Fe1 P2 1_545 . 2_556 122.62(4) ?
  Fe3b Fe1 O6 1_545 . 1_545 71.56(7) ?
  Fe3b Fe1 O6 1_545 . 2_546 80.56(8) ?
  Fe3b Fe1 O8 1_545 . . 100.70(8) ?
  Fe3b Fe1 O8 1_545 . 2_556 107.42(7) ?
  Fe3b Fe1 O9 1_545 . . 26.10(7) ?
  Fe3b Fe1 O9 1_545 . 2_556 155.14(8) ?
  Fe3b Fe1 Mn2 2_546 . . 113.14(4) ?
  Fe3b Fe1 Mn2 2_546 . 2_556 67.76(4) ?
  Fe3b Fe1 P2 2_546 . 1_545 88.56(4) ?
  Fe3b Fe1 P2 2_546 . . 122.62(4) ?
  Fe3b Fe1 P2 2_546 . 2_546 57.40(4) ?
  Fe3b Fe1 P2 2_546 . 2_556 91.34(4) ?
  Fe3b Fe1 O6 2_546 . 1_545 80.56(8) ?
  Fe3b Fe1 O6 2_546 . 2_546 71.56(7) ?
  Fe3b Fe1 O8 2_546 . . 107.42(7) ?
  Fe3b Fe1 O8 2_546 . 2_556 100.70(8) ?
  Fe3b Fe1 O9 2_546 . . 155.14(8) ?
  Fe3b Fe1 O9 2_546 . 2_556 26.10(7) ?
  Mn2 Fe1 Mn2 . . 2_556 177.71(2) ?
  Mn2 Fe1 P2 . . 1_545 114.34(3) ?
  Mn2 Fe1 P2 . . . 112.49(3) ?
  Mn2 Fe1 P2 . . 2_546 67.60(2) ?
  Mn2 Fe1 P2 . . 2_556 65.56(2) ?
  Mn2 Fe1 O6 . . 1_545 130.93(7) ?
  Mn2 Fe1 O6 . . 2_546 51.06(7) ?
  Mn2 Fe1 O8 . . . 129.30(7) ?
  Mn2 Fe1 O8 . . 2_556 48.68(7) ?
  Mn2 Fe1 O9 . . . 51.03(10) ?
  Mn2 Fe1 O9 . . 2_556 128.93(10) ?
  Mn2 Fe1 P2 2_556 . 1_545 67.60(2) ?
  Mn2 Fe1 P2 2_556 . . 65.56(2) ?
  Mn2 Fe1 P2 2_556 . 2_546 114.34(3) ?
  Mn2 Fe1 P2 2_556 . 2_556 112.49(3) ?
  Mn2 Fe1 O6 2_556 . 1_545 51.06(7) ?
  Mn2 Fe1 O6 2_556 . 2_546 130.93(7) ?
  Mn2 Fe1 O8 2_556 . . 48.68(7) ?
  Mn2 Fe1 O8 2_556 . 2_556 129.30(7) ?
  Mn2 Fe1 O9 2_556 . . 128.93(10) ?
  Mn2 Fe1 O9 2_556 . 2_556 51.03(10) ?
  P2 Fe1 P2 1_545 . . 102.49(3) ?
  P2 Fe1 P2 1_545 . 2_546 77.33(3) ?
  P2 Fe1 P2 1_545 . 2_556 179.82(3) ?
  P2 Fe1 O6 1_545 . 1_545 16.65(7) ?
  P2 Fe1 O6 1_545 . 2_546 85.38(8) ?
  P2 Fe1 O8 1_545 . . 95.37(7) ?
  P2 Fe1 O8 1_545 . 2_556 162.81(7) ?
  P2 Fe1 O9 1_545 . . 83.35(8) ?
  P2 Fe1 O9 1_545 . 2_556 97.81(8) ?
  P2 Fe1 P2 . . 2_546 179.82(3) ?
  P2 Fe1 P2 . . 2_556 77.69(3) ?
  P2 Fe1 O6 . . 1_545 94.45(8) ?
  P2 Fe1 O6 . . 2_546 163.44(7) ?
  P2 Fe1 O8 . . . 17.12(7) ?
  P2 Fe1 O8 . . 2_556 84.80(8) ?
  P2 Fe1 O9 . . . 82.16(8) ?
  P2 Fe1 O9 . . 2_556 96.68(8) ?
  P2 Fe1 P2 2_546 . 2_556 102.49(3) ?
  P2 Fe1 O6 2_546 . 1_545 85.38(8) ?
  P2 Fe1 O6 2_546 . 2_546 16.65(7) ?
  P2 Fe1 O8 2_546 . . 162.81(7) ?
  P2 Fe1 O8 2_546 . 2_556 95.37(7) ?
  P2 Fe1 O9 2_546 . . 97.81(8) ?
  P2 Fe1 O9 2_546 . 2_556 83.35(8) ?
  P2 Fe1 O6 2_556 . 1_545 163.44(7) ?
  P2 Fe1 O6 2_556 . 2_546 94.45(8) ?
  P2 Fe1 O8 2_556 . . 84.80(8) ?
  P2 Fe1 O8 2_556 . 2_556 17.12(7) ?
  P2 Fe1 O9 2_556 . . 96.68(8) ?
  P2 Fe1 O9 2_556 . 2_556 82.16(8) ?
  O6 Fe1 O6 1_545 . 2_546 96.62(11) ?
  O6 Fe1 O8 1_545 . . 83.90(10) ?
  O6 Fe1 O8 1_545 . 2_556 178.74(10) ?
  O6 Fe1 O9 1_545 . . 96.64(10) ?
  O6 Fe1 O9 1_545 . 2_556 84.35(10) ?
  O6 Fe1 O8 2_546 . . 178.74(10) ?
  O6 Fe1 O8 2_546 . 2_556 83.90(10) ?
  O6 Fe1 O9 2_546 . . 84.35(10) ?
  O6 Fe1 O9 2_546 . 2_556 96.64(10) ?
  O8 Fe1 O8 . . 2_556 95.60(10) ?
  O8 Fe1 O9 . . . 96.74(10) ?
  O8 Fe1 O9 . . 2_556 82.26(10) ?
  O8 Fe1 O9 2_556 . . 82.26(10) ?
  O8 Fe1 O9 2_556 . 2_556 96.74(10) ?
  O9 Fe1 O9 . . 2_556 178.53(8) ?
  Fe2b Fe2a Fe2b 1_545 . . 180 ?
  Fe2b Fe2a Fe3a 1_545 . . 88.873(9) ?
  Fe2b Fe2a Fe3a 1_545 . 3_665 91.127(9) ?
  Fe2b Fe2a Mn1 1_545 . 1_554 70.178(10) ?
  Fe2b Fe2a Mn1 1_545 . 3_666 109.822(10) ?
  Fe2b Fe2a P1 1_545 . 1_554 113.991(15) ?
  Fe2b Fe2a P1 1_545 . 3_666 66.009(15) ?
  Fe2b Fe2a O1 1_545 . 1_554 130.06(6) ?
  Fe2b Fe2a O1 1_545 . 3_666 49.94(6) ?
  Fe2b Fe2a O11 1_545 . . 133.54(8) ?
  Fe2b Fe2a O11 1_545 . 3_665 46.46(8) ?
  Fe2b Fe2a O12a 1_545 . . 111.06(10) ?
  Fe2b Fe2a O12a 1_545 . 3_665 68.94(10) ?
  Fe2b Fe2a O12b 1_545 . . 136.1(3) ?
  Fe2b Fe2a O12b 1_545 . 3_665 43.9(3) ?
  Fe2b Fe2a Fe3a . . . 91.127(9) ?
  Fe2b Fe2a Fe3a . . 3_665 88.873(9) ?
  Fe2b Fe2a Mn1 . . 1_554 109.822(10) ?
  Fe2b Fe2a Mn1 . . 3_666 70.178(10) ?
  Fe2b Fe2a P1 . . 1_554 66.009(15) ?
  Fe2b Fe2a P1 . . 3_666 113.991(15) ?
  Fe2b Fe2a O1 . . 1_554 49.94(6) ?
  Fe2b Fe2a O1 . . 3_666 130.06(6) ?
  Fe2b Fe2a O11 . . . 46.46(8) ?
  Fe2b Fe2a O11 . . 3_665 133.54(8) ?
  Fe2b Fe2a O12a . . . 68.94(10) ?
  Fe2b Fe2a O12a . . 3_665 111.06(10) ?
  Fe2b Fe2a O12b . . . 43.9(3) ?
  Fe2b Fe2a O12b . . 3_665 136.1(3) ?
  Fe3a Fe2a Fe3a . . 3_665 180 ?
  Fe3a Fe2a Mn1 . . 1_554 90.91(3) ?
  Fe3a Fe2a Mn1 . . 3_666 89.09(3) ?
  Fe3a Fe2a P1 . . 1_554 124.61(3) ?
  Fe3a Fe2a P1 . . 3_666 55.39(3) ?
  Fe3a Fe2a O1 . . 1_554 105.79(10) ?
  Fe3a Fe2a O1 . . 3_666 74.21(10) ?
  Fe3a Fe2a O11 . . . 104.35(9) ?
  Fe3a Fe2a O11 . . 3_665 75.65(9) ?
  Fe3a Fe2a O12a . . . 23.01(10) ?
  Fe3a Fe2a O12a . . 3_665 156.99(10) ?
  Fe3a Fe2a O12b . . . 47.7(3) ?
  Fe3a Fe2a O12b . . 3_665 132.3(3) ?
  Fe3a Fe2a Mn1 3_665 . 1_554 89.09(3) ?
  Fe3a Fe2a Mn1 3_665 . 3_666 90.91(3) ?
  Fe3a Fe2a P1 3_665 . 1_554 55.39(3) ?
  Fe3a Fe2a P1 3_665 . 3_666 124.61(3) ?
  Fe3a Fe2a O1 3_665 . 1_554 74.21(10) ?
  Fe3a Fe2a O1 3_665 . 3_666 105.79(10) ?
  Fe3a Fe2a O11 3_665 . . 75.65(9) ?
  Fe3a Fe2a O11 3_665 . 3_665 104.35(9) ?
  Fe3a Fe2a O12a 3_665 . . 156.99(10) ?
  Fe3a Fe2a O12a 3_665 . 3_665 23.01(10) ?
  Fe3a Fe2a O12b 3_665 . . 132.3(3) ?
  Fe3a Fe2a O12b 3_665 . 3_665 47.7(3) ?
  Mn1 Fe2a Mn1 1_554 . 3_666 180 ?
  Mn1 Fe2a P1 1_554 . 1_554 56.39(3) ?
  Mn1 Fe2a P1 1_554 . 3_666 123.61(3) ?
  Mn1 Fe2a O1 1_554 . 1_554 62.30(7) ?
  Mn1 Fe2a O1 1_554 . 3_666 117.70(7) ?
  Mn1 Fe2a O11 1_554 . . 150.87(9) ?
  Mn1 Fe2a O11 1_554 . 3_665 29.13(9) ?
  Mn1 Fe2a O12a 1_554 . . 92.73(11) ?
  Mn1 Fe2a O12a 1_554 . 3_665 87.27(11) ?
  Mn1 Fe2a O12b 1_554 . . 100.0(3) ?
  Mn1 Fe2a O12b 1_554 . 3_665 80.0(3) ?
  Mn1 Fe2a P1 3_666 . 1_554 123.61(3) ?
  Mn1 Fe2a P1 3_666 . 3_666 56.39(3) ?
  Mn1 Fe2a O1 3_666 . 1_554 117.70(7) ?
  Mn1 Fe2a O1 3_666 . 3_666 62.30(7) ?
  Mn1 Fe2a O11 3_666 . . 29.13(9) ?
  Mn1 Fe2a O11 3_666 . 3_665 150.87(9) ?
  Mn1 Fe2a O12a 3_666 . . 87.27(11) ?
  Mn1 Fe2a O12a 3_666 . 3_665 92.73(11) ?
  Mn1 Fe2a O12b 3_666 . . 80.0(3) ?
  Mn1 Fe2a O12b 3_666 . 3_665 100.0(3) ?
  P1 Fe2a P1 1_554 . 3_666 180 ?
  P1 Fe2a O1 1_554 . 1_554 22.07(8) ?
  P1 Fe2a O1 1_554 . 3_666 157.93(8) ?
  P1 Fe2a O11 1_554 . . 94.81(9) ?
  P1 Fe2a O11 1_554 . 3_665 85.19(9) ?
  P1 Fe2a O12a 1_554 . . 107.48(11) ?
  P1 Fe2a O12a 1_554 . 3_665 72.52(11) ?
  P1 Fe2a O12b 1_554 . . 91.4(3) ?
  P1 Fe2a O12b 1_554 . 3_665 88.6(3) ?
  P1 Fe2a O1 3_666 . 1_554 157.93(8) ?
  P1 Fe2a O1 3_666 . 3_666 22.07(8) ?
  P1 Fe2a O11 3_666 . . 85.19(9) ?
  P1 Fe2a O11 3_666 . 3_665 94.81(9) ?
  P1 Fe2a O12a 3_666 . . 72.52(11) ?
  P1 Fe2a O12a 3_666 . 3_665 107.48(11) ?
  P1 Fe2a O12b 3_666 . . 88.6(3) ?
  P1 Fe2a O12b 3_666 . 3_665 91.4(3) ?
  O1 Fe2a O1 1_554 . 3_666 180 ?
  O1 Fe2a O11 1_554 . . 89.42(11) ?
  O1 Fe2a O11 1_554 . 3_665 90.58(11) ?
  O1 Fe2a O12a 1_554 . . 86.36(14) ?
  O1 Fe2a O12a 1_554 . 3_665 93.64(14) ?
  O1 Fe2a O12b 1_554 . . 69.4(3) ?
  O1 Fe2a O12b 1_554 . 3_665 110.6(3) ?
  O1 Fe2a O11 3_666 . . 90.58(11) ?
  O1 Fe2a O11 3_666 . 3_665 89.42(11) ?
  O1 Fe2a O12a 3_666 . . 93.64(14) ?
  O1 Fe2a O12a 3_666 . 3_665 86.36(14) ?
  O1 Fe2a O12b 3_666 . . 110.6(3) ?
  O1 Fe2a O12b 3_666 . 3_665 69.4(3) ?
  O11 Fe2a O11 . . 3_665 180 ?
  O11 Fe2a O12a . . . 92.24(14) ?
  O11 Fe2a O12a . . 3_665 87.76(14) ?
  O11 Fe2a O12b . . . 74.2(3) ?
  O11 Fe2a O12b . . 3_665 105.8(3) ?
  O11 Fe2a O12a 3_665 . . 87.76(14) ?
  O11 Fe2a O12a 3_665 . 3_665 92.24(14) ?
  O11 Fe2a O12b 3_665 . . 105.8(3) ?
  O11 Fe2a O12b 3_665 . 3_665 74.2(3) ?
  O12a Fe2a O12a . . 3_665 180 ?
  O12a Fe2a O12b . . . 25.1(3) ?
  O12a Fe2a O12b . . 3_665 154.9(3) ?
  O12a Fe2a O12b 3_665 . . 154.9(3) ?
  O12a Fe2a O12b 3_665 . 3_665 25.1(3) ?
  O12b Fe2a O12b . . 3_665 180 ?
  Fe2a Fe2b Fe2a . . 1_565 180 ?
  Fe2a Fe2b Fe3b . . 1_554 89.10(3) ?
  Fe2a Fe2b Fe3b . . 3_676 90.90(3) ?
  Fe2a Fe2b Mn1 . . 1_564 111.022(10) ?
  Fe2a Fe2b Mn1 . . 3_666 68.978(10) ?
  Fe2a Fe2b P1 . . 1_554 65.790(15) ?
  Fe2a Fe2b P1 . . 3_676 114.210(15) ?
  Fe2a Fe2b O1 . . 1_554 48.87(6) ?
  Fe2a Fe2b O1 . . 3_676 131.13(6) ?
  Fe2a Fe2b O11 . . . 50.29(9) ?
  Fe2a Fe2b O11 . . 3_675 129.71(9) ?
  Fe2a Fe2b O12a . . . 44.66(8) ?
  Fe2a Fe2b O12a . . 3_675 135.34(8) ?
  Fe2a Fe2b O12b . . . 69.1(4) ?
  Fe2a Fe2b O12b . . 3_675 110.9(4) ?
  Fe2a Fe2b Fe3b 1_565 . 1_554 90.90(3) ?
  Fe2a Fe2b Fe3b 1_565 . 3_676 89.10(3) ?
  Fe2a Fe2b Mn1 1_565 . 1_564 68.978(10) ?
  Fe2a Fe2b Mn1 1_565 . 3_666 111.022(10) ?
  Fe2a Fe2b P1 1_565 . 1_554 114.210(15) ?
  Fe2a Fe2b P1 1_565 . 3_676 65.790(15) ?
  Fe2a Fe2b O1 1_565 . 1_554 131.13(6) ?
  Fe2a Fe2b O1 1_565 . 3_676 48.87(6) ?
  Fe2a Fe2b O11 1_565 . . 129.71(9) ?
  Fe2a Fe2b O11 1_565 . 3_675 50.29(9) ?
  Fe2a Fe2b O12a 1_565 . . 135.34(8) ?
  Fe2a Fe2b O12a 1_565 . 3_675 44.66(8) ?
  Fe2a Fe2b O12b 1_565 . . 110.9(4) ?
  Fe2a Fe2b O12b 1_565 . 3_675 69.1(4) ?
  Fe3b Fe2b Fe3b 1_554 . 3_676 180 ?
  Fe3b Fe2b Mn1 1_554 . 1_564 88.93(4) ?
  Fe3b Fe2b Mn1 1_554 . 3_666 91.07(4) ?
  Fe3b Fe2b P1 1_554 . 1_554 55.46(4) ?
  Fe3b Fe2b P1 1_554 . 3_676 124.54(4) ?
  Fe3b Fe2b O1 1_554 . 1_554 74.50(10) ?
  Fe3b Fe2b O1 1_554 . 3_676 105.50(10) ?
  Fe3b Fe2b O11 1_554 . . 75.10(10) ?
  Fe3b Fe2b O11 1_554 . 3_675 104.90(10) ?
  Fe3b Fe2b O12a 1_554 . . 133.41(8) ?
  Fe3b Fe2b O12a 1_554 . 3_675 46.59(8) ?
  Fe3b Fe2b O12b 1_554 . . 156.9(4) ?
  Fe3b Fe2b O12b 1_554 . 3_675 23.1(4) ?
  Fe3b Fe2b Mn1 3_676 . 1_564 91.07(4) ?
  Fe3b Fe2b Mn1 3_676 . 3_666 88.93(4) ?
  Fe3b Fe2b P1 3_676 . 1_554 124.54(4) ?
  Fe3b Fe2b P1 3_676 . 3_676 55.46(4) ?
  Fe3b Fe2b O1 3_676 . 1_554 105.50(10) ?
  Fe3b Fe2b O1 3_676 . 3_676 74.50(10) ?
  Fe3b Fe2b O11 3_676 . . 104.90(10) ?
  Fe3b Fe2b O11 3_676 . 3_675 75.10(10) ?
  Fe3b Fe2b O12a 3_676 . . 46.59(8) ?
  Fe3b Fe2b O12a 3_676 . 3_675 133.41(8) ?
  Fe3b Fe2b O12b 3_676 . . 23.1(4) ?
  Fe3b Fe2b O12b 3_676 . 3_675 156.9(4) ?
  Mn1 Fe2b Mn1 1_564 . 3_666 180 ?
  Mn1 Fe2b P1 1_564 . 1_554 57.46(3) ?
  Mn1 Fe2b P1 1_564 . 3_676 122.54(3) ?
  Mn1 Fe2b O1 1_564 . 1_554 64.46(7) ?
  Mn1 Fe2b O1 1_564 . 3_676 115.54(7) ?
  Mn1 Fe2b O11 1_564 . . 154.55(9) ?
  Mn1 Fe2b O11 1_564 . 3_675 25.45(9) ?
  Mn1 Fe2b O12a 1_564 . . 101.52(9) ?
  Mn1 Fe2b O12a 1_564 . 3_675 78.48(9) ?
  Mn1 Fe2b O12b 1_564 . . 91.9(4) ?
  Mn1 Fe2b O12b 1_564 . 3_675 88.1(4) ?
  Mn1 Fe2b P1 3_666 . 1_554 122.54(3) ?
  Mn1 Fe2b P1 3_666 . 3_676 57.46(3) ?
  Mn1 Fe2b O1 3_666 . 1_554 115.54(7) ?
  Mn1 Fe2b O1 3_666 . 3_676 64.46(7) ?
  Mn1 Fe2b O11 3_666 . . 25.45(9) ?
  Mn1 Fe2b O11 3_666 . 3_675 154.55(9) ?
  Mn1 Fe2b O12a 3_666 . . 78.48(9) ?
  Mn1 Fe2b O12a 3_666 . 3_675 101.52(9) ?
  Mn1 Fe2b O12b 3_666 . . 88.1(4) ?
  Mn1 Fe2b O12b 3_666 . 3_675 91.9(4) ?
  P1 Fe2b P1 1_554 . 3_676 180 ?
  P1 Fe2b O1 1_554 . 1_554 22.61(8) ?
  P1 Fe2b O1 1_554 . 3_676 157.39(8) ?
  P1 Fe2b O11 1_554 . . 97.10(9) ?
  P1 Fe2b O11 1_554 . 3_675 82.90(9) ?
  P1 Fe2b O12a 1_554 . . 92.53(8) ?
  P1 Fe2b O12a 1_554 . 3_675 87.47(8) ?
  P1 Fe2b O12b 1_554 . . 106.4(4) ?
  P1 Fe2b O12b 1_554 . 3_675 73.6(4) ?
  P1 Fe2b O1 3_676 . 1_554 157.39(8) ?
  P1 Fe2b O1 3_676 . 3_676 22.61(8) ?
  P1 Fe2b O11 3_676 . . 82.90(9) ?
  P1 Fe2b O11 3_676 . 3_675 97.10(9) ?
  P1 Fe2b O12a 3_676 . . 87.47(8) ?
  P1 Fe2b O12a 3_676 . 3_675 92.53(8) ?
  P1 Fe2b O12b 3_676 . . 73.6(4) ?
  P1 Fe2b O12b 3_676 . 3_675 106.4(4) ?
  O1 Fe2b O1 1_554 . 3_676 180 ?
  O1 Fe2b O11 1_554 . . 91.85(12) ?
  O1 Fe2b O11 1_554 . 3_675 88.15(12) ?
  O1 Fe2b O12a 1_554 . . 69.91(11) ?
  O1 Fe2b O12a 1_554 . 3_675 110.09(11) ?
  O1 Fe2b O12b 1_554 . . 85.1(4) ?
  O1 Fe2b O12b 1_554 . 3_675 94.9(4) ?
  O1 Fe2b O11 3_676 . . 88.15(12) ?
  O1 Fe2b O11 3_676 . 3_675 91.85(12) ?
  O1 Fe2b O12a 3_676 . . 110.09(11) ?
  O1 Fe2b O12a 3_676 . 3_675 69.91(11) ?
  O1 Fe2b O12b 3_676 . . 94.9(4) ?
  O1 Fe2b O12b 3_676 . 3_675 85.1(4) ?
  O11 Fe2b O11 . . 3_675 180 ?
  O11 Fe2b O12a . . . 76.98(12) ?
  O11 Fe2b O12a . . 3_675 103.02(12) ?
  O11 Fe2b O12b . . . 95.3(4) ?
  O11 Fe2b O12b . . 3_675 84.7(4) ?
  O11 Fe2b O12a 3_675 . . 103.02(12) ?
  O11 Fe2b O12a 3_675 . 3_675 76.98(12) ?
  O11 Fe2b O12b 3_675 . . 84.7(4) ?
  O11 Fe2b O12b 3_675 . 3_675 95.3(4) ?
  O12a Fe2b O12a . . 3_675 180 ?
  O12a Fe2b O12b . . . 24.5(4) ?
  O12a Fe2b O12b . . 3_675 155.5(4) ?
  O12a Fe2b O12b 3_675 . . 155.5(4) ?
  O12a Fe2b O12b 3_675 . 3_675 24.5(4) ?
  O12b Fe2b O12b . . 3_675 180 ?
  Fe1 Fe3a Fe2a 3_666 . . 129.83(3) ?
  Fe1 Fe3a Fe3b 3_666 . 3_666 112.57(5) ?
  Fe1 Fe3a Fe3b 3_666 . 3_676 67.06(4) ?
  Fe1 Fe3a Mn2 3_666 . 2_556 145.46(3) ?
  Fe1 Fe3a Mn2 3_666 . 3_666 46.22(3) ?
  Fe1 Fe3a P1 3_666 . 3_666 93.69(3) ?
  Fe1 Fe3a P2 3_666 . . 93.52(3) ?
  Fe1 Fe3a P2 3_666 . 3_666 56.60(3) ?
  Fe1 Fe3a O2 3_666 . 3_666 87.85(8) ?
  Fe1 Fe3a O5 3_666 . 3_666 73.16(8) ?
  Fe1 Fe3a O7 3_666 . . 92.90(8) ?
  Fe1 Fe3a O9 3_666 . 3_666 26.56(8) ?
  Fe1 Fe3a O10 3_666 . . 156.49(8) ?
  Fe1 Fe3a O12a 3_666 . . 120.48(11) ?
  Fe1 Fe3a O12b 3_666 . . 103.0(3) ?
  Fe2a Fe3a Fe3b . . 3_666 91.22(5) ?
  Fe2a Fe3a Fe3b . . 3_676 88.95(4) ?
  Fe2a Fe3a Mn2 . . 2_556 82.88(3) ?
  Fe2a Fe3a Mn2 . . 3_666 84.48(3) ?
  Fe2a Fe3a P1 . . 3_666 54.17(3) ?
  Fe2a Fe3a P2 . . . 117.23(3) ?
  Fe2a Fe3a P2 . . 3_666 158.89(3) ?
  Fe2a Fe3a O2 . . 3_666 71.74(8) ?
  Fe2a Fe3a O5 . . 3_666 146.07(8) ?
  Fe2a Fe3a O7 . . . 104.10(8) ?
  Fe2a Fe3a O9 . . 3_666 106.56(10) ?
  Fe2a Fe3a O10 . . . 71.30(9) ?
  Fe2a Fe3a O12a . . . 22.72(10) ?
  Fe2a Fe3a O12b . . . 45.4(3) ?
  Fe3b Fe3a Fe3b 3_666 . 3_676 179.60(7) ?
  Fe3b Fe3a Mn2 3_666 . 2_556 71.50(5) ?
  Fe3b Fe3a Mn2 3_666 . 3_666 111.53(5) ?
  Fe3b Fe3a P1 3_666 . 3_666 67.70(5) ?
  Fe3b Fe3a P2 3_666 . . 113.67(6) ?
  Fe3b Fe3a P2 3_666 . 3_666 69.20(5) ?
  Fe3b Fe3a O2 3_666 . 3_666 53.08(8) ?
  Fe3b Fe3a O5 3_666 . 3_666 54.91(9) ?
  Fe3b Fe3a O7 3_666 . . 130.74(9) ?
  Fe3b Fe3a O9 3_666 . 3_666 133.02(9) ?
  Fe3b Fe3a O10 3_666 . . 50.17(8) ?
  Fe3b Fe3a O12a 3_666 . . 113.14(11) ?
  Fe3b Fe3a O12b 3_666 . . 136.2(3) ?
  Fe3b Fe3a Mn2 3_676 . 2_556 108.87(5) ?
  Fe3b Fe3a Mn2 3_676 . 3_666 68.13(5) ?
  Fe3b Fe3a P1 3_676 . 3_666 112.13(5) ?
  Fe3b Fe3a P2 3_676 . . 66.55(5) ?
  Fe3b Fe3a P2 3_676 . 3_666 110.58(4) ?
  Fe3b Fe3a O2 3_676 . 3_666 126.66(8) ?
  Fe3b Fe3a O5 3_676 . 3_666 124.93(9) ?
  Fe3b Fe3a O7 3_676 . . 49.54(8) ?
  Fe3b Fe3a O9 3_676 . 3_666 46.59(8) ?
  Fe3b Fe3a O10 3_676 . . 130.23(8) ?
  Fe3b Fe3a O12a 3_676 . . 67.07(11) ?
  Fe3b Fe3a O12b 3_676 . . 44.0(3) ?
  Mn2 Fe3a Mn2 2_556 . 3_666 167.07(3) ?
  Mn2 Fe3a P1 2_556 . 3_666 117.95(3) ?
  Mn2 Fe3a P2 2_556 . . 56.49(3) ?
  Mn2 Fe3a P2 2_556 . 3_666 97.56(4) ?
  Mn2 Fe3a O2 2_556 . 3_666 116.90(7) ?
  Mn2 Fe3a O5 2_556 . 3_666 84.01(9) ?
  Mn2 Fe3a O7 2_556 . . 64.63(7) ?
  Mn2 Fe3a O9 2_556 . 3_666 151.89(9) ?
  Mn2 Fe3a O10 2_556 . . 26.32(8) ?
  Mn2 Fe3a O12a 2_556 . . 84.98(11) ?
  Mn2 Fe3a O12b 2_556 . . 93.3(3) ?
  Mn2 Fe3a P1 3_666 . 3_666 55.21(3) ?
  Mn2 Fe3a P2 3_666 . . 128.60(3) ?
  Mn2 Fe3a P2 3_666 . 3_666 95.20(4) ?
  Mn2 Fe3a O2 3_666 . 3_666 61.03(7) ?
  Mn2 Fe3a O5 3_666 . 3_666 108.16(9) ?
  Mn2 Fe3a O7 3_666 . . 116.30(7) ?
  Mn2 Fe3a O9 3_666 . 3_666 32.71(9) ?
  Mn2 Fe3a O10 3_666 . . 147.75(9) ?
  Mn2 Fe3a O12a 3_666 . . 82.32(11) ?
  Mn2 Fe3a O12b 3_666 . . 75.8(3) ?
  P1 Fe3a P2 3_666 . . 171.32(4) ?
  P1 Fe3a P2 3_666 . 3_666 108.75(4) ?
  P1 Fe3a O2 3_666 . 3_666 20.02(8) ?
  P1 Fe3a O5 3_666 . 3_666 106.80(9) ?
  P1 Fe3a O7 3_666 . . 154.99(8) ?
  P1 Fe3a O9 3_666 . 3_666 87.90(10) ?
  P1 Fe3a O10 3_666 . . 92.82(9) ?
  P1 Fe3a O12a 3_666 . . 71.12(11) ?
  P1 Fe3a O12b 3_666 . . 85.8(3) ?
  P2 Fe3a P2 . . 3_666 79.32(4) ?
  P2 Fe3a O2 . . 3_666 165.62(8) ?
  P2 Fe3a O5 . . 3_666 79.95(9) ?
  P2 Fe3a O7 . . . 19.29(7) ?
  P2 Fe3a O9 . . 3_666 96.44(9) ?
  P2 Fe3a O10 . . . 82.41(9) ?
  P2 Fe3a O12a . . . 100.99(11) ?
  P2 Fe3a O12b . . . 87.8(3) ?
  P2 Fe3a O2 3_666 . 3_666 89.58(8) ?
  P2 Fe3a O5 3_666 . 3_666 16.88(7) ?
  P2 Fe3a O7 3_666 . . 94.98(8) ?
  P2 Fe3a O9 3_666 . 3_666 82.96(9) ?
  P2 Fe3a O10 3_666 . . 99.94(8) ?
  P2 Fe3a O12a 3_666 . . 177.07(11) ?
  P2 Fe3a O12b 3_666 . . 154.6(3) ?
  O2 Fe3a O5 3_666 . 3_666 86.77(12) ?
  O2 Fe3a O7 3_666 . . 174.97(11) ?
  O2 Fe3a O9 3_666 . 3_666 91.19(11) ?
  O2 Fe3a O10 3_666 . . 90.63(11) ?
  O2 Fe3a O12a 3_666 . . 90.56(14) ?
  O2 Fe3a O12b 3_666 . . 105.8(3) ?
  O5 Fe3a O7 3_666 . . 98.21(12) ?
  O5 Fe3a O9 3_666 . 3_666 99.65(12) ?
  O5 Fe3a O10 3_666 . . 83.33(11) ?
  O5 Fe3a O12a 3_666 . . 166.03(13) ?
  O5 Fe3a O12b 3_666 . . 166.9(3) ?
  O7 Fe3a O9 . . 3_666 87.29(11) ?
  O7 Fe3a O10 . . . 90.66(11) ?
  O7 Fe3a O12a . . . 84.77(14) ?
  O7 Fe3a O12b . . . 69.2(3) ?
  O9 Fe3a O10 3_666 . . 176.59(10) ?
  O9 Fe3a O12a 3_666 . . 94.11(13) ?
  O9 Fe3a O12b 3_666 . . 76.7(3) ?
  O10 Fe3a O12a . . . 82.98(13) ?
  O10 Fe3a O12b . . . 100.0(3) ?
  O12a Fe3a O12b . . . 23.1(3) ?
  Fe1 Fe3b Fe2b 1_565 . 1_556 130.68(6) ?
  Fe1 Fe3b Fe3a 1_565 . 3_666 111.36(6) ?
  Fe1 Fe3b Fe3a 1_565 . 3_676 69.01(4) ?
  Fe1 Fe3b Mn2 1_565 . 1_565 46.59(3) ?
  Fe1 Fe3b Mn2 1_565 . 4_565 145.49(6) ?
  Fe1 Fe3b P1 1_565 . . 93.43(6) ?
  Fe1 Fe3b P2 1_565 . . 57.03(4) ?
  Fe1 Fe3b P2 1_565 . 3_676 93.67(5) ?
  Fe1 Fe3b O2 1_565 . . 87.85(10) ?
  Fe1 Fe3b O5 1_565 . . 75.32(9) ?
  Fe1 Fe3b O7 1_565 . 3_676 93.27(9) ?
  Fe1 Fe3b O9 1_565 . 1_565 27.15(9) ?
  Fe1 Fe3b O10 1_565 . 3_666 158.02(12) ?
  Fe1 Fe3b O12a 1_565 . 3_676 104.03(9) ?
  Fe1 Fe3b O12b 1_565 . 3_676 123.5(4) ?
  Fe2b Fe3b Fe3a 1_556 . 3_666 90.81(5) ?
  Fe2b Fe3b Fe3a 1_556 . 3_676 89.02(5) ?
  Fe2b Fe3b Mn2 1_556 . 1_565 84.61(5) ?
  Fe2b Fe3b Mn2 1_556 . 4_565 82.67(5) ?
  Fe2b Fe3b P1 1_556 . . 54.19(4) ?
  Fe2b Fe3b P2 1_556 . . 156.81(6) ?
  Fe2b Fe3b P2 1_556 . 3_676 116.71(6) ?
  Fe2b Fe3b O2 1_556 . . 71.99(10) ?
  Fe2b Fe3b O5 1_556 . . 141.15(10) ?
  Fe2b Fe3b O7 1_556 . 3_676 103.59(10) ?
  Fe2b Fe3b O9 1_556 . 1_565 107.14(12) ?
  Fe2b Fe3b O10 1_556 . 3_666 69.75(10) ?
  Fe2b Fe3b O12a 1_556 . 3_676 45.63(8) ?
  Fe2b Fe3b O12b 1_556 . 3_676 22.0(4) ?
  Fe3a Fe3b Fe3a 3_666 . 3_676 179.60(9) ?
  Fe3a Fe3b Mn2 3_666 . 1_565 111.96(7) ?
  Fe3a Fe3b Mn2 3_666 . 4_565 70.71(5) ?
  Fe3a Fe3b P1 3_666 . . 67.40(5) ?
  Fe3a Fe3b P2 3_666 . . 67.33(5) ?
  Fe3a Fe3b P2 3_666 . 3_676 115.00(7) ?
  Fe3a Fe3b O2 3_666 . . 51.61(8) ?
  Fe3a Fe3b O5 3_666 . . 50.39(8) ?
  Fe3a Fe3b O7 3_666 . 3_676 132.14(12) ?
  Fe3a Fe3b O9 3_666 . 1_565 132.34(12) ?
  Fe3a Fe3b O10 3_666 . 3_666 54.15(9) ?
  Fe3a Fe3b O12a 3_666 . 3_676 136.09(11) ?
  Fe3a Fe3b O12b 3_666 . 3_676 111.6(4) ?
  Fe3a Fe3b Mn2 3_676 . 1_565 68.38(4) ?
  Fe3a Fe3b Mn2 3_676 . 4_565 108.92(6) ?
  Fe3a Fe3b P1 3_676 . . 112.77(7) ?
  Fe3a Fe3b P2 3_676 . . 112.89(6) ?
  Fe3a Fe3b P2 3_676 . 3_676 64.78(5) ?
  Fe3a Fe3b O2 3_676 . . 128.65(11) ?
  Fe3a Fe3b O5 3_676 . . 129.77(11) ?
  Fe3a Fe3b O7 3_676 . 3_676 47.58(8) ?
  Fe3a Fe3b O9 3_676 . 1_565 48.05(8) ?
  Fe3a Fe3b O10 3_676 . 3_666 125.45(11) ?
  Fe3a Fe3b O12a 3_676 . 3_676 43.70(8) ?
  Fe3a Fe3b O12b 3_676 . 3_676 68.2(4) ?
  Mn2 Fe3b Mn2 1_565 . 4_565 167.05(6) ?
  Mn2 Fe3b P1 1_565 . . 55.69(4) ?
  Mn2 Fe3b P2 1_565 . . 96.17(6) ?
  Mn2 Fe3b P2 1_565 . 3_676 127.29(6) ?
  Mn2 Fe3b O2 1_565 . . 62.79(8) ?
  Mn2 Fe3b O5 1_565 . . 109.57(11) ?
  Mn2 Fe3b O7 1_565 . 3_676 114.65(10) ?
  Mn2 Fe3b O9 1_565 . 1_565 32.14(10) ?
  Mn2 Fe3b O10 1_565 . 3_666 149.37(13) ?
  Mn2 Fe3b O12a 1_565 . 3_676 75.06(9) ?
  Mn2 Fe3b O12b 1_565 . 3_676 83.9(4) ?
  Mn2 Fe3b P1 4_565 . . 117.26(6) ?
  Mn2 Fe3b P2 4_565 . . 96.47(6) ?
  Mn2 Fe3b P2 4_565 . 3_676 57.83(4) ?
  Mn2 Fe3b O2 4_565 . . 114.97(10) ?
  Mn2 Fe3b O5 4_565 . . 82.10(10) ?
  Mn2 Fe3b O7 4_565 . 3_676 66.41(9) ?
  Mn2 Fe3b O9 4_565 . 1_565 153.16(12) ?
  Mn2 Fe3b O10 4_565 . 3_666 22.84(10) ?
  Mn2 Fe3b O12a 4_565 . 3_676 94.20(10) ?
  Mn2 Fe3b O12b 4_565 . 3_676 83.5(4) ?
  P1 Fe3b P2 . . . 107.53(6) ?
  P1 Fe3b P2 . . 3_676 170.89(7) ?
  P1 Fe3b O2 . . . 20.80(8) ?
  P1 Fe3b O5 . . . 103.38(11) ?
  P1 Fe3b O7 . . 3_676 154.02(11) ?
  P1 Fe3b O9 . . 1_565 87.75(12) ?
  P1 Fe3b O10 . . 3_666 94.75(12) ?
  P1 Fe3b O12a . . 3_676 85.74(10) ?
  P1 Fe3b O12b . . 3_676 71.5(4) ?
  P2 Fe3b P2 . . 3_676 81.17(6) ?
  P2 Fe3b O2 . . . 87.71(10) ?
  P2 Fe3b O5 . . . 19.03(7) ?
  P2 Fe3b O7 . . 3_676 97.15(10) ?
  P2 Fe3b O9 . . 1_565 84.02(11) ?
  P2 Fe3b O10 . . 3_666 101.02(11) ?
  P2 Fe3b O12a . . 3_676 156.56(10) ?
  P2 Fe3b O12b . . 3_676 178.8(4) ?
  P2 Fe3b O2 3_676 . . 165.60(11) ?
  P2 Fe3b O5 3_676 . . 83.96(11) ?
  P2 Fe3b O7 3_676 . 3_676 19.37(8) ?
  P2 Fe3b O9 3_676 . 1_565 96.00(11) ?
  P2 Fe3b O10 3_676 . 3_666 80.66(11) ?
  P2 Fe3b O12a 3_676 . 3_676 87.00(10) ?
  P2 Fe3b O12b 3_676 . 3_676 99.8(4) ?
  O2 Fe3b O5 . . . 82.58(13) ?
  O2 Fe3b O7 . . 3_676 174.82(15) ?
  O2 Fe3b O9 . . 1_565 91.87(14) ?
  O2 Fe3b O10 . . 3_666 92.62(13) ?
  O2 Fe3b O12a . . 3_676 106.54(14) ?
  O2 Fe3b O12b . . 3_676 91.2(4) ?
  O5 Fe3b O7 . . 3_676 102.60(14) ?
  O5 Fe3b O9 . . 1_565 102.46(14) ?
  O5 Fe3b O10 . . 3_666 82.95(13) ?
  O5 Fe3b O12a . . 3_676 170.87(15) ?
  O5 Fe3b O12b . . 3_676 160.1(4) ?
  O7 Fe3b O9 3_676 . 1_565 86.86(13) ?
  O7 Fe3b O10 3_676 . 3_666 88.24(13) ?
  O7 Fe3b O12a 3_676 . 3_676 68.28(12) ?
  O7 Fe3b O12b 3_676 . 3_676 83.9(4) ?
  O9 Fe3b O10 1_565 . 3_666 173.38(15) ?
  O9 Fe3b O12a 1_565 . 3_676 77.14(13) ?
  O9 Fe3b O12b 1_565 . 3_676 96.6(4) ?
  O10 Fe3b O12a 3_666 . 3_676 96.90(13) ?
  O10 Fe3b O12b 3_666 . 3_676 78.4(4) ?
  O12a Fe3b O12b 3_676 . 3_676 24.5(4) ?
  Fe2a Mn1 Fe2a 1_556 . 2_556 140.36(2) ?
  Fe2a Mn1 Fe2b 1_556 . 1_546 40.844(10) ?
  Fe2a Mn1 Fe2b 1_556 . 2_546 178.801(17) ?
  Fe2a Mn1 Mn2 1_556 . . 90.21(3) ?
  Fe2a Mn1 Mn2 1_556 . 2_557 90.19(3) ?
  Fe2a Mn1 P1 1_556 . 1_545 86.82(2) ?
  Fe2a Mn1 P1 1_556 . . 53.64(2) ?
  Fe2a Mn1 P1 1_556 . 2_547 126.10(3) ?
  Fe2a Mn1 P1 1_556 . 2_557 93.82(3) ?
  Fe2a Mn1 O3 1_556 . 1_545 93.95(7) ?
  Fe2a Mn1 O3 1_556 . 2_547 110.64(7) ?
  Fe2a Mn1 O4 1_556 . . 71.38(7) ?
  Fe2a Mn1 O4 1_556 . 2_557 84.48(8) ?
  Fe2a Mn1 O11 1_556 . 3_666 26.67(7) ?
  Fe2a Mn1 O11 1_556 . 4_466 159.00(7) ?
  Fe2a Mn1 Fe2b 2_556 . 1_546 178.801(17) ?
  Fe2a Mn1 Fe2b 2_556 . 2_546 40.844(10) ?
  Fe2a Mn1 Mn2 2_556 . . 90.19(3) ?
  Fe2a Mn1 Mn2 2_556 . 2_557 90.21(3) ?
  Fe2a Mn1 P1 2_556 . 1_545 126.10(3) ?
  Fe2a Mn1 P1 2_556 . . 93.82(3) ?
  Fe2a Mn1 P1 2_556 . 2_547 86.82(2) ?
  Fe2a Mn1 P1 2_556 . 2_557 53.64(2) ?
  Fe2a Mn1 O3 2_556 . 1_545 110.64(7) ?
  Fe2a Mn1 O3 2_556 . 2_547 93.95(7) ?
  Fe2a Mn1 O4 2_556 . . 84.48(8) ?
  Fe2a Mn1 O4 2_556 . 2_557 71.38(7) ?
  Fe2a Mn1 O11 2_556 . 3_666 159.00(7) ?
  Fe2a Mn1 O11 2_556 . 4_466 26.67(7) ?
  Fe2b Mn1 Fe2b 1_546 . 2_546 137.96(2) ?
  Fe2b Mn1 Mn2 1_546 . . 89.80(3) ?
  Fe2b Mn1 Mn2 1_546 . 2_557 89.78(3) ?
  Fe2b Mn1 P1 1_546 . 1_545 52.97(2) ?
  Fe2b Mn1 P1 1_546 . . 87.20(2) ?
  Fe2b Mn1 P1 1_546 . 2_547 92.15(3) ?
  Fe2b Mn1 P1 1_546 . 2_557 127.26(3) ?
  Fe2b Mn1 O3 1_546 . 1_545 68.68(7) ?
  Fe2b Mn1 O3 1_546 . 2_547 85.28(7) ?
  Fe2b Mn1 O4 1_546 . . 96.26(8) ?
  Fe2b Mn1 O4 1_546 . 2_557 109.30(7) ?
  Fe2b Mn1 O11 1_546 . 3_666 21.92(7) ?
  Fe2b Mn1 O11 1_546 . 4_466 152.29(7) ?
  Fe2b Mn1 Mn2 2_546 . . 89.78(3) ?
  Fe2b Mn1 Mn2 2_546 . 2_557 89.80(3) ?
  Fe2b Mn1 P1 2_546 . 1_545 92.15(3) ?
  Fe2b Mn1 P1 2_546 . . 127.26(3) ?
  Fe2b Mn1 P1 2_546 . 2_547 52.97(2) ?
  Fe2b Mn1 P1 2_546 . 2_557 87.20(2) ?
  Fe2b Mn1 O3 2_546 . 1_545 85.28(7) ?
  Fe2b Mn1 O3 2_546 . 2_547 68.68(7) ?
  Fe2b Mn1 O4 2_546 . . 109.30(7) ?
  Fe2b Mn1 O4 2_546 . 2_557 96.26(8) ?
  Fe2b Mn1 O11 2_546 . 3_666 152.29(7) ?
  Fe2b Mn1 O11 2_546 . 4_466 21.92(7) ?
  Mn2 Mn1 Mn2 . . 2_557 178.84(2) ?
  Mn2 Mn1 P1 . . 1_545 58.61(2) ?
  Mn2 Mn1 P1 . . . 58.89(2) ?
  Mn2 Mn1 P1 . . 2_547 120.32(3) ?
  Mn2 Mn1 P1 . . 2_557 122.18(3) ?
  Mn2 Mn1 O3 . . 1_545 39.18(6) ?
  Mn2 Mn1 O3 . . 2_547 139.69(7) ?
  Mn2 Mn1 O4 . . . 39.18(7) ?
  Mn2 Mn1 O4 . . 2_557 141.96(7) ?
  Mn2 Mn1 O11 . . 3_666 103.34(9) ?
  Mn2 Mn1 O11 . . 4_466 76.59(9) ?
  Mn2 Mn1 P1 2_557 . 1_545 120.32(3) ?
  Mn2 Mn1 P1 2_557 . . 122.18(3) ?
  Mn2 Mn1 P1 2_557 . 2_547 58.61(2) ?
  Mn2 Mn1 P1 2_557 . 2_557 58.89(2) ?
  Mn2 Mn1 O3 2_557 . 1_545 139.69(7) ?
  Mn2 Mn1 O3 2_557 . 2_547 39.18(6) ?
  Mn2 Mn1 O4 2_557 . . 141.96(7) ?
  Mn2 Mn1 O4 2_557 . 2_557 39.18(7) ?
  Mn2 Mn1 O11 2_557 . 3_666 76.59(9) ?
  Mn2 Mn1 O11 2_557 . 4_466 103.34(9) ?
  P1 Mn1 P1 1_545 . . 102.78(3) ?
  P1 Mn1 P1 1_545 . 2_547 76.18(3) ?
  P1 Mn1 P1 1_545 . 2_557 178.96(3) ?
  P1 Mn1 O3 1_545 . 1_545 20.76(6) ?
  P1 Mn1 O3 1_545 . 2_547 87.54(7) ?
  P1 Mn1 O4 1_545 . . 92.33(7) ?
  P1 Mn1 O4 1_545 . 2_557 157.47(7) ?
  P1 Mn1 O11 1_545 . 3_666 74.89(7) ?
  P1 Mn1 O11 1_545 . 4_466 99.66(7) ?
  P1 Mn1 P1 . . 2_547 178.96(3) ?
  P1 Mn1 P1 . . 2_557 78.25(3) ?
  P1 Mn1 O3 . . 1_545 91.47(7) ?
  P1 Mn1 O3 . . 2_547 159.76(7) ?
  P1 Mn1 O4 . . . 22.05(7) ?
  P1 Mn1 O4 . . 2_557 88.64(8) ?
  P1 Mn1 O11 . . 3_666 80.02(7) ?
  P1 Mn1 O11 . . 4_466 105.36(7) ?
  P1 Mn1 P1 2_547 . 2_557 102.78(3) ?
  P1 Mn1 O3 2_547 . 1_545 87.54(7) ?
  P1 Mn1 O3 2_547 . 2_547 20.76(6) ?
  P1 Mn1 O4 2_547 . . 157.47(7) ?
  P1 Mn1 O4 2_547 . 2_557 92.33(7) ?
  P1 Mn1 O11 2_547 . 3_666 99.66(7) ?
  P1 Mn1 O11 2_547 . 4_466 74.89(7) ?
  P1 Mn1 O3 2_557 . 1_545 159.76(7) ?
  P1 Mn1 O3 2_557 . 2_547 91.47(7) ?
  P1 Mn1 O4 2_557 . . 88.64(8) ?
  P1 Mn1 O4 2_557 . 2_557 22.05(7) ?
  P1 Mn1 O11 2_557 . 3_666 105.36(7) ?
  P1 Mn1 O11 2_557 . 4_466 80.02(7) ?
  O3 Mn1 O3 1_545 . 2_547 103.18(9) ?
  O3 Mn1 O4 1_545 . . 76.23(10) ?
  O3 Mn1 O4 1_545 . 2_557 177.97(9) ?
  O3 Mn1 O11 1_545 . 3_666 89.70(10) ?
  O3 Mn1 O11 1_545 . 4_466 86.10(10) ?
  O3 Mn1 O4 2_547 . . 177.97(9) ?
  O3 Mn1 O4 2_547 . 2_557 76.23(10) ?
  O3 Mn1 O11 2_547 . 3_666 86.10(10) ?
  O3 Mn1 O11 2_547 . 4_466 89.70(10) ?
  O4 Mn1 O4 . . 2_557 104.43(10) ?
  O4 Mn1 O11 . . 3_666 95.83(11) ?
  O4 Mn1 O11 . . 4_466 88.32(10) ?
  O4 Mn1 O11 2_557 . 3_666 88.32(10) ?
  O4 Mn1 O11 2_557 . 4_466 95.83(11) ?
  O11 Mn1 O11 3_666 . 4_466 173.23(9) ?
  Fe1 Mn2 Fe3a . . 2_556 102.09(3) ?
  Fe1 Mn2 Fe3a . . 3_666 66.63(3) ?
  Fe1 Mn2 Fe3b . . 1_545 65.65(4) ?
  Fe1 Mn2 Fe3b . . 4_465 101.26(4) ?
  Fe1 Mn2 Mn1 . . . 161.07(3) ?
  Fe1 Mn2 P1 . . 1_545 108.79(3) ?
  Fe1 Mn2 P1 . . . 110.90(3) ?
  Fe1 Mn2 P2 . . 2_546 62.35(3) ?
  Fe1 Mn2 P2 . . 2_556 63.45(3) ?
  Fe1 Mn2 O3 . . 1_545 131.48(8) ?
  Fe1 Mn2 O4 . . . 134.25(8) ?
  Fe1 Mn2 O6 . . 2_546 43.00(7) ?
  Fe1 Mn2 O8 . . 2_556 43.11(7) ?
  Fe1 Mn2 O9 . . . 45.23(8) ?
  Fe1 Mn2 O10 . . 2_556 115.32(8) ?
  Fe3a Mn2 Fe3a 2_556 . 3_666 137.52(2) ?
  Fe3a Mn2 Fe3b 2_556 . 1_545 166.99(4) ?
  Fe3a Mn2 Fe3b 2_556 . 4_465 37.79(3) ?
  Fe3a Mn2 Mn1 2_556 . . 96.01(3) ?
  Fe3a Mn2 P1 2_556 . 1_545 129.98(3) ?
  Fe3a Mn2 P1 2_556 . . 97.56(3) ?
  Fe3a Mn2 P2 2_556 . 2_546 84.74(3) ?
  Fe3a Mn2 P2 2_556 . 2_556 54.09(3) ?
  Fe3a Mn2 O3 2_556 . 1_545 115.37(8) ?
  Fe3a Mn2 O4 2_556 . . 89.56(8) ?
  Fe3a Mn2 O6 2_556 . 2_546 91.82(7) ?
  Fe3a Mn2 O8 2_556 . 2_556 70.08(8) ?
  Fe3a Mn2 O9 2_556 . . 143.54(8) ?
  Fe3a Mn2 O10 2_556 . 2_556 25.14(6) ?
  Fe3a Mn2 Fe3b 3_666 . 1_545 43.49(3) ?
  Fe3a Mn2 Fe3b 3_666 . 4_465 167.14(4) ?
  Fe3a Mn2 Mn1 3_666 . . 96.15(3) ?
  Fe3a Mn2 P1 3_666 . 1_545 91.34(3) ?
  Fe3a Mn2 P1 3_666 . . 55.15(3) ?
  Fe3a Mn2 P2 3_666 . 2_546 119.23(3) ?
  Fe3a Mn2 P2 3_666 . 2_556 86.27(3) ?
  Fe3a Mn2 O3 3_666 . 1_545 99.93(8) ?
  Fe3a Mn2 O4 3_666 . . 74.98(8) ?
  Fe3a Mn2 O6 3_666 . 2_546 102.38(8) ?
  Fe3a Mn2 O8 3_666 . 2_556 76.04(7) ?
  Fe3a Mn2 O9 3_666 . . 29.15(6) ?
  Fe3a Mn2 O10 3_666 . 2_556 161.21(6) ?
  Fe3b Mn2 Fe3b 1_545 . 4_465 137.04(4) ?
  Fe3b Mn2 Mn1 1_545 . . 96.65(4) ?
  Fe3b Mn2 P1 1_545 . 1_545 55.19(4) ?
  Fe3b Mn2 P1 1_545 . . 91.26(4) ?
  Fe3b Mn2 P2 1_545 . 2_546 85.47(4) ?
  Fe3b Mn2 P2 1_545 . 2_556 119.23(4) ?
  Fe3b Mn2 O3 1_545 . 1_545 73.25(8) ?
  Fe3b Mn2 O4 1_545 . . 102.14(8) ?
  Fe3b Mn2 O6 1_545 . 2_546 76.25(8) ?
  Fe3b Mn2 O8 1_545 . 2_556 101.01(8) ?
  Fe3b Mn2 O9 1_545 . . 27.93(7) ?
  Fe3b Mn2 O10 1_545 . 2_556 155.30(7) ?
  Fe3b Mn2 Mn1 4_465 . . 96.41(4) ?
  Fe3b Mn2 P1 4_465 . 1_545 96.99(4) ?
  Fe3b Mn2 P1 4_465 . . 130.46(4) ?
  Fe3b Mn2 P2 4_465 . 2_546 54.09(4) ?
  Fe3b Mn2 P2 4_465 . 2_556 84.18(4) ?
  Fe3b Mn2 O3 4_465 . 1_545 91.42(8) ?
  Fe3b Mn2 O4 4_465 . . 113.70(9) ?
  Fe3b Mn2 O6 4_465 . 2_546 68.74(8) ?
  Fe3b Mn2 O8 4_465 . 2_556 92.17(8) ?
  Fe3b Mn2 O9 4_465 . . 142.47(8) ?
  Fe3b Mn2 O10 4_465 . 2_556 20.63(7) ?
  Mn1 Mn2 P1 . . 1_545 61.91(3) ?
  Mn1 Mn2 P1 . . . 60.62(3) ?
  Mn1 Mn2 P2 . . 2_546 125.61(3) ?
  Mn1 Mn2 P2 . . 2_556 125.72(3) ?
  Mn1 Mn2 O3 . . 1_545 40.52(7) ?
  Mn1 Mn2 O4 . . . 39.48(7) ?
  Mn1 Mn2 O6 . . 2_546 142.66(6) ?
  Mn1 Mn2 O8 . . 2_556 143.35(6) ?
  Mn1 Mn2 O9 . . . 115.85(8) ?
  Mn1 Mn2 O10 . . 2_556 83.53(8) ?
  P1 Mn2 P1 1_545 . . 106.55(3) ?
  P1 Mn2 P2 1_545 . 2_546 76.38(3) ?
  P1 Mn2 P2 1_545 . 2_556 172.19(3) ?
  P1 Mn2 O3 1_545 . 1_545 22.69(7) ?
  P1 Mn2 O4 1_545 . . 95.67(7) ?
  P1 Mn2 O6 1_545 . 2_546 85.32(6) ?
  P1 Mn2 O8 1_545 . 2_556 151.83(7) ?
  P1 Mn2 O9 1_545 . . 83.05(7) ?
  P1 Mn2 O10 1_545 . 2_556 104.86(7) ?
  P1 Mn2 P2 . . 2_546 173.24(4) ?
  P1 Mn2 P2 . . 2_556 78.12(3) ?
  P1 Mn2 O3 . . 1_545 94.19(7) ?
  P1 Mn2 O4 . . . 23.39(8) ?
  P1 Mn2 O6 . . 2_546 153.81(7) ?
  P1 Mn2 O8 . . 2_556 86.99(6) ?
  P1 Mn2 O9 . . . 84.27(7) ?
  P1 Mn2 O10 . . 2_556 109.89(7) ?
  P2 Mn2 P2 2_546 . 2_556 98.31(3) ?
  P2 Mn2 O3 2_546 . 1_545 90.53(7) ?
  P2 Mn2 O4 2_546 . . 163.37(8) ?
  P2 Mn2 O6 2_546 . 2_546 19.42(7) ?
  P2 Mn2 O8 2_546 . 2_556 87.83(7) ?
  P2 Mn2 O9 2_546 . . 90.10(7) ?
  P2 Mn2 O10 2_546 . 2_556 74.72(7) ?
  P2 Mn2 O3 2_556 . 1_545 165.07(8) ?
  P2 Mn2 O4 2_556 . . 90.89(7) ?
  P2 Mn2 O6 2_556 . 2_546 87.93(6) ?
  P2 Mn2 O8 2_556 . 2_556 20.52(7) ?
  P2 Mn2 O9 2_556 . . 91.32(7) ?
  P2 Mn2 O10 2_556 . 2_556 78.86(7) ?
  O3 Mn2 O4 1_545 . . 77.80(10) ?
  O3 Mn2 O6 1_545 . 2_546 103.79(9) ?
  O3 Mn2 O8 1_545 . 2_556 174.14(11) ?
  O3 Mn2 O9 1_545 . . 100.72(10) ?
  O3 Mn2 O10 1_545 . 2_556 92.03(10) ?
  O4 Mn2 O6 . . 2_546 177.18(11) ?
  O4 Mn2 O8 . . 2_556 104.92(9) ?
  O4 Mn2 O9 . . . 103.58(10) ?
  O4 Mn2 O10 . . 2_556 93.68(11) ?
  O6 Mn2 O8 2_546 . 2_556 73.29(9) ?
  O6 Mn2 O9 2_546 . . 73.89(10) ?
  O6 Mn2 O10 2_546 . 2_556 88.61(10) ?
  O8 Mn2 O9 2_556 . . 73.67(10) ?
  O8 Mn2 O10 2_556 . 2_556 92.96(10) ?
  O9 Mn2 O10 . . 2_556 160.32(11) ?
  Fe2a P1 Fe2b 1_556 . 1_556 48.20(2) ?
  Fe2a P1 Fe3a 1_556 . 3_666 70.44(3) ?
  Fe2a P1 Fe3b 1_556 . . 88.77(5) ?
  Fe2a P1 Mn1 1_556 . . 69.97(2) ?
  Fe2a P1 Mn1 1_556 . 1_565 107.07(3) ?
  Fe2a P1 Mn2 1_556 . . 101.48(3) ?
  Fe2a P1 Mn2 1_556 . 1_565 147.87(3) ?
  Fe2a P1 O1 1_556 . . 28.98(9) ?
  Fe2a P1 O2 1_556 . . 93.73(11) ?
  Fe2a P1 O3 1_556 . . 135.77(10) ?
  Fe2a P1 O4 1_556 . . 94.54(10) ?
  Fe2b P1 Fe3a 1_556 . 3_666 88.52(4) ?
  Fe2b P1 Fe3b 1_556 . . 70.36(4) ?
  Fe2b P1 Mn1 1_556 . . 106.92(3) ?
  Fe2b P1 Mn1 1_556 . 1_565 69.56(2) ?
  Fe2b P1 Mn2 1_556 . . 148.35(3) ?
  Fe2b P1 Mn2 1_556 . 1_565 100.96(3) ?
  Fe2b P1 O1 1_556 . . 30.26(9) ?
  Fe2b P1 O2 1_556 . . 94.43(11) ?
  Fe2b P1 O3 1_556 . . 91.55(9) ?
  Fe2b P1 O4 1_556 . . 137.73(10) ?
  Fe3a P1 Fe3b 3_666 . . 44.90(4) ?
  Fe3a P1 Mn1 3_666 . . 105.72(3) ?
  Fe3a P1 Mn1 3_666 . 1_565 148.10(3) ?
  Fe3a P1 Mn2 3_666 . . 69.64(3) ?
  Fe3a P1 Mn2 3_666 . 1_565 104.97(4) ?
  Fe3a P1 O1 3_666 . . 94.74(12) ?
  Fe3a P1 O2 3_666 . . 26.91(8) ?
  Fe3a P1 O3 3_666 . . 135.64(11) ?
  Fe3a P1 O4 3_666 . . 97.22(11) ?
  Fe3b P1 Mn1 . . . 149.52(5) ?
  Fe3b P1 Mn1 . . 1_565 104.27(4) ?
  Fe3b P1 Mn2 . . . 105.16(5) ?
  Fe3b P1 Mn2 . . 1_565 69.12(4) ?
  Fe3b P1 O1 . . . 95.38(13) ?
  Fe3b P1 O2 . . . 28.61(9) ?
  Fe3b P1 O3 . . . 93.93(11) ?
  Fe3b P1 O4 . . . 137.89(11) ?
  Mn1 P1 Mn1 . . 1_565 102.78(3) ?
  Mn1 P1 Mn2 . . . 60.50(2) ?
  Mn1 P1 Mn2 . . 1_565 138.61(4) ?
  Mn1 P1 O1 . . . 76.73(10) ?
  Mn1 P1 O2 . . . 128.24(7) ?
  Mn1 P1 O3 . . . 116.54(11) ?
  Mn1 P1 O4 . . . 31.32(9) ?
  Mn1 P1 Mn2 1_565 . . 139.00(4) ?
  Mn1 P1 Mn2 1_565 . 1_565 59.48(2) ?
  Mn1 P1 O1 1_565 . . 78.09(10) ?
  Mn1 P1 O2 1_565 . . 128.93(7) ?
  Mn1 P1 O3 1_565 . . 29.92(9) ?
  Mn1 P1 O4 1_565 . . 114.62(11) ?
  Mn2 P1 Mn2 . . 1_565 106.55(3) ?
  Mn2 P1 O1 . . . 126.21(8) ?
  Mn2 P1 O2 . . . 76.56(9) ?
  Mn2 P1 O3 . . . 120.10(10) ?
  Mn2 P1 O4 . . . 33.12(10) ?
  Mn2 P1 O1 1_565 . . 127.23(8) ?
  Mn2 P1 O2 1_565 . . 78.07(9) ?
  Mn2 P1 O3 1_565 . . 31.86(9) ?
  Mn2 P1 O4 1_565 . . 117.53(10) ?
  O1 P1 O2 . . . 112.21(17) ?
  O1 P1 O3 . . . 107.03(13) ?
  O1 P1 O4 . . . 107.50(13) ?
  O2 P1 O3 . . . 109.16(13) ?
  O2 P1 O4 . . . 109.34(13) ?
  O3 P1 O4 . . . 111.60(15) ?
  Fe1 P2 Fe1 . . 1_565 102.49(3) ?
  Fe1 P2 Fe3a . . . 104.61(3) ?
  Fe1 P2 Fe3a . . 3_666 67.23(3) ?
  Fe1 P2 Fe3b . . . 100.96(5) ?
  Fe1 P2 Fe3b . . 3_676 152.57(4) ?
  Fe1 P2 Mn2 . . 2_556 50.99(2) ?
  Fe1 P2 Mn2 . . 2_566 123.38(4) ?
  Fe1 P2 O5 . . . 88.70(10) ?
  Fe1 P2 O6 . . . 111.49(11) ?
  Fe1 P2 O7 . . . 125.73(8) ?
  Fe1 P2 O8 . . . 22.02(9) ?
  Fe1 P2 Fe3a 1_565 . . 150.87(3) ?
  Fe1 P2 Fe3a 1_565 . 3_666 99.46(3) ?
  Fe1 P2 Fe3b 1_565 . . 65.57(4) ?
  Fe1 P2 Fe3b 1_565 . 3_676 102.91(4) ?
  Fe1 P2 Mn2 1_565 . 2_556 122.53(4) ?
  Fe1 P2 Mn2 1_565 . 2_566 50.04(2) ?
  Fe1 P2 O5 1_565 . . 90.93(10) ?
  Fe1 P2 O6 1_565 . . 21.37(9) ?
  Fe1 P2 O7 1_565 . . 125.07(8) ?
  Fe1 P2 O8 1_565 . . 110.15(11) ?
  Fe3a P2 Fe3a . . 3_666 100.68(4) ?
  Fe3a P2 Fe3b . . . 118.59(5) ?
  Fe3a P2 Fe3b . . 3_676 48.67(4) ?
  Fe3a P2 Mn2 . . 2_556 69.42(3) ?
  Fe3a P2 Mn2 . . 2_566 104.76(3) ?
  Fe3a P2 O5 . . . 100.12(12) ?
  Fe3a P2 O6 . . . 132.75(11) ?
  Fe3a P2 O7 . . . 26.06(8) ?
  Fe3a P2 O8 . . . 91.79(10) ?
  Fe3a P2 Fe3b 3_666 . . 43.48(4) ?
  Fe3a P2 Fe3b 3_666 . 3_676 118.07(5) ?
  Fe3a P2 Mn2 3_666 . 2_556 109.14(3) ?
  Fe3a P2 Mn2 3_666 . 2_566 147.71(3) ?
  Fe3a P2 O5 3_666 . . 21.90(9) ?
  Fe3a P2 O6 3_666 . . 120.69(10) ?
  Fe3a P2 O7 3_666 . . 120.98(11) ?
  Fe3a P2 O8 3_666 . . 86.87(9) ?
  Fe3b P2 Fe3b . . 3_676 98.83(6) ?
  Fe3b P2 Mn2 . . 2_556 150.80(5) ?
  Fe3b P2 Mn2 . . 2_566 105.68(4) ?
  Fe3b P2 O5 . . . 26.42(10) ?
  Fe3b P2 O6 . . . 83.65(9) ?
  Fe3b P2 O7 . . . 120.38(11) ?
  Fe3b P2 O8 . . . 122.97(10) ?
  Fe3b P2 Mn2 3_676 . 2_556 105.50(5) ?
  Fe3b P2 Mn2 3_676 . 2_566 68.08(4) ?
  Fe3b P2 O5 3_676 . . 101.06(12) ?
  Fe3b P2 O6 3_676 . . 89.38(11) ?
  Fe3b P2 O7 3_676 . . 27.03(8) ?
  Fe3b P2 O8 3_676 . . 134.36(11) ?
  Mn2 P2 Mn2 2_556 . 2_566 98.31(3) ?
  Mn2 P2 O5 2_556 . . 129.79(9) ?
  Mn2 P2 O6 2_556 . . 112.12(10) ?
  Mn2 P2 O7 2_556 . . 79.78(9) ?
  Mn2 P2 O8 2_556 . . 29.37(9) ?
  Mn2 P2 O5 2_566 . . 131.21(9) ?
  Mn2 P2 O6 2_566 . . 28.84(9) ?
  Mn2 P2 O7 2_566 . . 79.67(9) ?
  Mn2 P2 O8 2_566 . . 111.62(9) ?
  O5 P2 O6 . . . 109.95(13) ?
  O5 P2 O7 . . . 112.57(17) ?
  O5 P2 O8 . . . 108.76(13) ?
  O6 P2 O7 . . . 106.87(13) ?
  O6 P2 O8 . . . 110.92(14) ?
  O7 P2 O8 . . . 107.76(13) ?
  Fe2a O1 Fe2b 1_556 . 1_556 81.18(10) ?
  Fe2a O1 P1 1_556 . . 128.95(16) ?
  Fe2b O1 P1 1_556 . . 127.13(15) ?
  Fe3a O2 Fe3b 3_666 . . 75.31(12) ?
  Fe3a O2 P1 3_666 . . 133.07(14) ?
  Fe3b O2 P1 . . . 130.59(14) ?
  Mn1 O3 Mn2 1_565 . 1_565 100.31(10) ?
  Mn1 O3 P1 1_565 . . 129.32(13) ?
  Mn2 O3 P1 1_565 . . 125.45(15) ?
  Mn1 O4 Mn2 . . . 101.33(11) ?
  Mn1 O4 P1 . . . 126.63(14) ?
  Mn2 O4 P1 . . . 123.49(16) ?
  Fe3a O5 Fe3b 3_666 . . 74.70(12) ?
  Fe3a O5 P2 3_666 . . 141.22(15) ?
  Fe3b O5 P2 . . . 134.56(15) ?
  Fe1 O6 Mn2 1_565 . 2_566 85.95(9) ?
  Fe1 O6 P2 1_565 . . 141.99(15) ?
  Mn2 O6 P2 2_566 . . 131.73(15) ?
  Fe3a O7 Fe3b . . 3_676 82.88(12) ?
  Fe3a O7 P2 . . . 134.65(13) ?
  Fe3b O7 P2 3_676 . . 133.60(14) ?
  Fe1 O8 Mn2 . . 2_556 88.21(9) ?
  Fe1 O8 P2 . . . 140.87(14) ?
  Mn2 O8 P2 2_556 . . 130.11(15) ?
  Fe1 O9 Fe3a . . 3_666 127.25(13) ?
  Fe1 O9 Fe3b . . 1_545 126.75(14) ?
  Fe1 O9 Mn2 . . . 83.74(11) ?
  Fe3a O9 Fe3b 3_666 . 1_545 85.36(13) ?
  Fe3a O9 Mn2 3_666 . . 118.14(13) ?
  Fe3b O9 Mn2 1_545 . . 119.93(15) ?
  Fe3a O10 Fe3b . . 3_666 75.68(12) ?
  Fe3a O10 Mn2 . . 2_556 128.53(13) ?
  Fe3b O10 Mn2 3_666 . 2_556 136.53(15) ?
  Fe2a O11 Fe2b . . . 83.25(14) ?
  Fe2a O11 Mn1 . . 3_666 124.19(12) ?
  Fe2b O11 Mn1 . . 3_666 132.63(14) ?
  Fe2a O12a Fe2b . . . 66.41(11) ?
  Fe2a O12a Fe3a . . . 134.27(19) ?
  Fe2a O12a Fe3b . . 3_676 152.82(19) ?
  Fe2a O12a O12b . . . 109.4(7) ?
  Fe2b O12a Fe3a . . . 155.49(17) ?
  Fe2b O12a Fe3b . . 3_676 87.78(11) ?
  Fe2b O12a O12b . . . 43.1(7) ?
  Fe3a O12a Fe3b . . 3_676 69.22(12) ?
  Fe3a O12a O12b . . . 115.1(7) ?
  Fe3b O12a O12b 3_676 . . 45.9(7) ?
  Fe2a O12b Fe2b . . . 67.0(4) ?
  Fe2a O12b Fe3a . . . 86.8(4) ?
  Fe2a O12b Fe3b . . 3_676 152.6(6) ?
  Fe2a O12b O12a . . . 45.5(5) ?
  Fe2b O12b Fe3a . . . 152.0(7) ?
  Fe2b O12b Fe3b . . 3_676 134.9(7) ?
  Fe2b O12b O12a . . . 112.5(9) ?
  Fe3a O12b Fe3b . . 3_676 67.8(4) ?
  Fe3a O12b O12a . . . 41.8(5) ?
  Fe3b O12b O12a 3_676 . . 109.6(9) ?

loop_
 _geom_torsion_atom_site_label_1
 _geom_torsion_atom_site_label_2
 _geom_torsion_atom_site_label_3
 _geom_torsion_atom_site_label_4
 _geom_torsion_site_symmetry_1
 _geom_torsion_site_symmetry_2
 _geom_torsion_site_symmetry_3
 _geom_torsion_site_symmetry_4
 _geom_torsion
 _geom_torsion_publ_flag
 ? ? ? ? ? ? ? ? ? ?

loop_
 _geom_hbond_atom_site_label_D
 _geom_hbond_atom_site_label_H
 _geom_hbond_atom_site_label_A
 _geom_hbond_site_symmetry_D
 _geom_hbond_site_symmetry_H
 _geom_hbond_site_symmetry_A
 _geom_hbond_distance_DH
 _geom_hbond_distance_HA
 _geom_hbond_distance_DA
 _geom_hbond_angle_DHA
 _geom_hbond_publ_flag
 ? ? ? ? ? ? ? ? ? ? ?


#=======================================================================

# 11. STRUCTURE-FACTOR LIST

loop_
 _refln_index_h
 _refln_index_k
 _refln_index_l
 _refln_F_squared_calc
 _refln_F_squared_meas
 _refln_F_squared_sigma
 _refln_observed_status
   4   0   0 23486.40 20788.10   879.17 o
   6   0   0  5178.88  5176.58   219.79 o
   8   0   0   555.33   539.81    23.74 o
  10   0   0  2210.28  2395.75   101.98 o
  12   0   0     4.94     8.79     5.28 <
   0   1   0  6750.64  6061.03   257.60 o
   3   1   0 35396.30 32402.00   970.61 o
   4   1   0  1705.28  1554.38    54.51 o
   5   1   0 15679.40 16784.30   503.77 o
   7   1   0  4265.38  4146.19   124.84 o
   8   1   0     6.77     5.28     2.64 <
   9   1   0   997.68  1015.45    31.65 o
  13   1   0   283.51   277.82    11.43 o
  14   1   0     0.02     5.28     4.40 <
  16   1   0    93.96    92.31     8.79 o
  18   1   0   140.53   135.39    10.55 o
   0   2   0 26886.90 26137.00  1104.24 o
   1   2   0   161.29   176.71     7.03 o
   3   2   0   458.11   400.02    13.19 o
   5   2   0   122.32   111.65     5.28 o
   7   2   0    25.73    16.70     3.52 o
   8   2   0   975.23   864.23    30.77 o
   9   2   0     0.77    -3.52     6.15 <
  10   2   0   381.67   365.74    18.46 o
  11   2   0    29.32    30.77     6.15 o
  13   2   0    51.40    50.11     7.03 o
  14   2   0     4.97    16.70    16.70 <
  15   2   0    62.43    57.15     7.91 o
  16   2   0    24.57    24.62     7.03 o
  17   2   0    13.70    11.43     6.15 <
  18   2   0   226.79   221.55    14.07 o
   0   3   0  1070.45  1093.69    48.35 o
   1   3   0  3654.04  3212.51   114.29 o
   2   3   0  1099.48  1092.81    39.56 o
   4   3   0   529.38   502.01    19.34 o
   6   3   0     2.27     7.91     3.52 <
   8   3   0   157.04   147.70     6.15 o
   9   3   0   533.52   549.48    21.10 o
  10   3   0   117.54   125.72     7.03 o
  11   3   0  1505.50  1562.29    69.45 o
  12   3   0     5.61     7.91     8.79 <
  13   3   0     1.33     1.76     7.03 <
  14   3   0     0.17     4.40     7.03 <
  16   3   0     9.27    14.95     7.03 <
  17   3   0    43.58    51.87     7.91 o
  18   3   0    31.32    34.29     7.03 o
   1   4   0   109.85   127.48     6.15 o
   5   4   0    77.19    59.78     5.28 o
   7   4   0    43.87    40.44     4.40 o
   8   4   0    19.77    26.38     5.28 o
   9   4   0    32.99    36.05     4.40 o
  11   4   0     0.15    -0.88     7.03 <
  12   4   0    85.33    80.00     9.67 o
  13   4   0     2.08    13.19    10.55 <
  14   4   0   646.35   599.60    40.44 o
  15   4   0     1.51    15.83     8.79 <
  17   4   0    22.43    16.70     9.67 <
   1   5   0   162.79   174.08     9.67 o
   2   5   0   480.96   500.25    20.22 o
   3   5   0  3441.26  3172.94    96.71 o
   4   5   0    84.43    72.09     5.28 o
   5   5   0   680.83   625.97    21.10 o
   6   5   0    33.31    34.29     4.40 o
   7   5   0   800.85   888.85    29.01 o
   8   5   0     0.76    10.55     4.40 <
  10   5   0     8.45    18.46     6.15 <
  11   5   0   371.76   364.86    20.22 o
  13   5   0    33.41    20.22     6.15 o
   2   6   0  2654.47  2676.21    81.76 o
   6   6   0   404.55   379.80    16.70 o
   7   6   0     0.21     1.76     4.40 <
   8   6   0    78.83    89.68     7.03 o
   9   6   0    37.49    50.99     7.03 o
   2   7   0   221.58   226.83     9.67 o
   4   7   0   167.13   216.28    20.22 o
   5   7   0   771.10   842.25    39.56 o
   6   7   0    24.05    29.01     7.91 o
 -16   0   1   171.01   214.52    16.70 o
  -8   0   1 38770.70 39303.50  1916.60 o
  -2   0   1  1206.44  1168.42    70.33 o
   0   0   1   463.46   451.02    27.25 o
   2   0   1   272.19   231.22    10.55 o
   6   0   1   776.96   801.81    35.17 o
  10   0   1  8011.43  7944.22   336.72 o
  12   0   1  4450.69  4635.01   228.59 o
  16   0   1   649.78   667.29    36.05 o
 -18   1   1    45.72    26.38     7.91 o
 -16   1   1     6.75    11.43     6.15 <
 -15   1   1    84.62   123.96    13.19 o
 -14   1   1    17.11     8.79     5.28 <
 -13   1   1   197.87   178.47    10.55 o
 -12   1   1   262.07   240.89    24.62 o
 -10   1   1   315.08   356.95    17.58 o
  -8   1   1  2800.66  2539.06   109.02 o
  -6   1   1  3012.49  2609.39   111.65 o
  -2   1   1   887.87   793.90    24.62 o
   1   1   1  2595.52  2419.49    72.97 o
   3   1   1 31422.80 29209.70   874.78 o
   4   1   1   334.78   345.52    11.43 o
   7   1   1  4403.58  4552.37   158.25 o
   8   1   1     9.24     5.28     2.64 <
  10   1   1   273.15   240.89     9.67 o
  14   1   1   489.40   469.48    15.83 o
  16   1   1   228.57   266.39    14.95 o
  18   1   1    99.71   128.36    16.70 o
 -18   2   1   184.95   167.92    12.31 o
 -17   2   1     1.25    -3.52     6.15 <
 -16   2   1    41.42    45.72     7.03 o
 -15   2   1    34.09    44.84    10.55 o
 -13   2   1     9.32    14.07     6.15 <
 -12   2   1  1177.84  1089.30    49.23 o
 -11   2   1    47.38    42.20     7.03 o
 -10   2   1  2177.89  2427.40   104.62 o
  -9   2   1    21.82    19.34     6.15 o
  -8   2   1  2883.29  2934.69   125.72 o
  -7   2   1    45.74    36.93     5.28 o
   1   2   1   170.01   164.41     6.15 o
   3   2   1   123.09   132.76     7.03 o
   4   2   1  1833.31  1804.07    55.39 o
   5   2   1   145.77   136.27     6.15 o
   6   2   1 14585.80 12856.20   445.74 o
   7   2   1     3.72    -4.40     2.64 <
   8   2   1 14538.80 14593.40   437.83 o
  10   2   1  4245.80  4242.02   138.91 o
  11   2   1     7.76    15.83     3.52 o
  12   2   1  2306.42  2499.49    96.71 o
  13   2   1    10.88    14.95     6.15 <
  15   2   1     2.48    -5.28     7.03 <
  16   2   1  1435.32  1431.30    64.18 o
  17   2   1    23.81    32.53     7.91 o
  18   2   1  2178.70  2138.15   131.88 o
 -18   3   1     8.89    10.55     6.15 <
 -17   3   1   118.55   122.21    15.83 o
 -16   3   1    86.60   110.78     9.67 o
 -15   3   1   125.32   114.29    10.55 o
 -14   3   1     2.31    14.95     7.03 <
 -13   3   1     1.70     0.00     7.03 <
 -12   3   1     3.44     8.79     9.67 <
 -10   3   1   569.34   571.46    27.25 o
  -9   3   1  1555.49  1587.79    69.45 o
  -8   3   1   586.46   575.86    18.46 o
  -7   3   1  5923.24  5355.93   164.41 o
  -6   3   1   935.93   922.25    29.01 o
  -4   3   1   162.49   181.11     7.91 o
  -3   3   1   145.63   179.35    11.43 o
  -2   3   1   862.54   829.06    30.77 o
  -1   3   1    35.51    21.98     4.40 o
   0   3   1    12.67    17.58     3.52 o
   2   3   1    42.82    49.23     4.40 o
   4   3   1   725.24   651.47    29.89 o
   6   3   1    15.96    24.62     3.52 o
   8   3   1    29.18    35.17     3.52 o
   9   3   1   296.18   276.06    10.55 o
  10   3   1   224.46   236.50     9.67 o
  12   3   1   110.26   131.88    10.55 o
  13   3   1   307.86   305.95    17.58 o
  14   3   1   563.58   608.39    29.89 o
  16   3   1   229.76   253.20    24.62 o
  17   3   1   110.48   -28.13     7.91 <
  18   3   1   300.57   309.47    17.58 o
 -17   4   1     3.04     7.91     8.79 <
 -16   4   1   134.32   134.51    10.55 o
 -15   4   1    49.64    77.37     8.79 o
 -14   4   1    54.26    69.45    11.43 o
 -13   4   1    76.03   105.50    14.07 o
 -11   4   1     3.44    11.43     7.03 <
  -9   4   1   167.13   181.99     7.91 o
  -7   4   1    17.61    21.98     4.40 o
  -3   4   1   263.04   269.03    10.55 o
  -1   4   1     0.87     1.76     3.52 <
   1   4   1   799.20   874.78    28.13 o
   3   4   1     1.83    -0.88     3.52 <
   4   4   1    14.99    14.07     4.40 o
   5   4   1     3.53     2.64     4.40 <
   7   4   1   132.07   144.18    10.55 o
   8   4   1   601.46   563.55    19.34 o
   9   4   1     0.04    -4.40     4.40 <
  11   4   1    82.29    94.95     8.79 o
  13   4   1    13.09     9.67     7.03 <
  14   4   1   251.10   254.96    15.83 o
  15   4   1    69.69    80.88     8.79 o
 -14   5   1    19.00    28.13     9.67 <
 -13   5   1   131.99   131.00    10.55 o
 -12   5   1    95.66   130.12    10.55 o
 -11   5   1    10.97     1.76     7.03 <
 -10   5   1     1.05    13.19     8.79 <
  -7   5   1  1200.34  1178.97    37.80 o
  -6   5   1   452.11   433.43    14.95 o
  -5   5   1  1481.39  1357.45    49.23 o
  -2   5   1    17.69     2.64     3.52 <
   1   5   1   969.68   928.41    35.17 o
   3   5   1  1128.89  1218.54    38.68 o
   4   5   1     0.48     0.88     3.52 <
   5   5   1   643.26   636.52    21.10 o
   6   5   1    30.58    43.08     5.28 o
   7   5   1   330.52   304.19    12.31 o
   8   5   1    21.39    25.50     4.40 o
   9   5   1    26.60    -3.52     3.52 <
  10   5   1    58.53    55.39     5.28 o
  11   5   1    89.93    68.58     8.79 o
  13   5   1    20.25     9.67     8.79 <
  -3   6   1    26.46     6.15     4.40 <
   1   6   1     2.33     5.28     4.40 <
   2   6   1     4.55     4.40     4.40 <
   3   6   1     4.28     0.88     5.28 <
   4   6   1   129.50   101.11     7.91 o
   5   6   1     0.43     0.88     4.40 <
   6   6   1   752.61   783.34    26.38 o
   8   6   1  1484.31  1513.94    48.35 o
  -6   7   1   210.00   269.03    30.77 o
  -4   7   1    37.29   -40.44     9.67 <
  -1   7   1   119.68   117.81     7.03 o
   0   7   1    10.95    21.98     4.40 o
   1   7   1     7.68    11.43     4.40 <
   5   7   1   187.05   240.01    20.22 o
   6   7   1     2.57     2.64     5.28 <
 -14   0   2  6086.11  6208.73   262.87 o
  -8   0   2 11824.50 11463.60   484.42 o
  -6   0   2   879.67   898.52    38.68 o
  -4   0   2 18153.50 18269.30   773.67 o
   2   0   2  7336.40  7942.47   335.85 o
   4   0   2 13677.20 12472.90   530.14 o
   6   0   2  3219.33  3558.90   151.22 o
   8   0   2 33064.00 35793.00  1515.70 o
  14   0   2  1754.72  1653.73    72.09 o
  16   0   2  4194.07  4571.71   195.18 o
 -18   1   2    24.79    23.74     7.91 o
 -16   1   2   425.27   401.78    20.22 o
 -14   1   2   436.35   382.44    19.34 o
 -12   1   2  1106.76  1188.64    73.85 o
 -11   1   2  5166.44  6165.65   261.99 o
 -10   1   2   736.28   689.27    31.65 o
  -8   1   2   302.56   294.52    14.07 o
  -7   1   2   345.03   330.57    15.83 o
  -6   1   2    44.43    49.23     5.28 o
  -3   1   2 25186.40 25515.40   770.16 o
  -1   1   2  2522.79  2887.21   100.23 o
   0   1   2   152.07   143.30     7.91 o
   1   1   2  3841.52  3754.08   112.53 o
   4   1   2   533.87   602.23    21.98 o
   6   1   2  1559.32  1569.33    55.39 o
   8   1   2  1236.26  1077.87    33.41 o
  10   1   2   849.91   833.46    26.38 o
  11   1   2  9932.58 10501.70   315.62 o
  12   1   2    70.00    66.82     4.40 o
  13   1   2 12263.70 13097.10   392.99 o
  14   1   2    62.10    64.18     5.28 o
  16   1   2    13.78    19.34     8.79 <
  17   1   2   489.65   531.02    26.38 o
  18   1   2     7.38     7.03    10.55 <
 -17   2   2     2.11     3.52     7.03 <
 -16   2   2    43.76    46.60     7.03 o
 -15   2   2     3.18     0.00     8.79 <
 -13   2   2    37.81    43.08     7.03 o
 -12   2   2   761.85   759.61    35.17 o
 -11   2   2    47.00    49.23     6.15 o
 -10   2   2  4071.82  3760.23   160.89 o
  -9   2   2    13.05    14.95     5.28 <
  -8   2   2  2381.19  2179.47    94.95 o
  -7   2   2   113.30    76.49     9.67 o
  -5   2   2    40.36    42.20     3.52 o
  -4   2   2   949.78   916.98    28.13 o
  -3   2   2    72.62    79.13     4.40 o
  -1   2   2   248.44   232.98     8.79 o
   1   2   2   167.61   196.06     7.03 o
   2   2   2   743.97   775.43    28.13 o
   3   2   2    73.22    75.61     5.28 o
   4   2   2  2485.11  2413.34    72.97 o
   5   2   2   177.88   169.68     7.91 o
   6   2   2 33728.90 31454.20   939.84 o
   7   2   2   123.32   105.50     5.28 o
   8   2   2  2121.28  2051.99    72.97 o
   9   2   2     0.18     0.00     3.52 <
  10   2   2 13900.90 14249.70   429.92 o
  11   2   2     2.14     1.76     3.52 <
  12   2   2    20.24    10.55     3.52 o
  13   2   2     2.53    -1.76     3.52 <
  14   2   2  1838.04  1549.11    95.83 o
  15   2   2     1.38     4.40     6.15 <
  16   2   2  2825.01  2466.96   108.14 o
  17   2   2     0.21     0.00     7.03 <
  18   2   2    67.18    78.25     8.79 o
 -18   3   2     0.22    15.83     7.91 <
 -16   3   2   124.51   158.25    11.43 o
 -15   3   2   616.68   549.48    39.56 o
 -14   3   2   274.85   335.85    18.46 o
 -13   3   2   875.96   778.95    36.93 o
 -12   3   2   592.92   648.83    31.65 o
 -11   3   2  2643.30  2424.76   105.50 o
 -10   3   2   271.21   294.52    15.83 o
  -9   3   2  1237.21  1138.53    50.99 o
  -8   3   2   261.18   269.03     9.67 o
  -7   3   2   117.55   100.23     8.79 o
  -6   3   2    27.66    26.38     3.52 o
  -5   3   2    13.19     8.79     3.52 <
  -4   3   2    17.67    22.86     3.52 o
  -2   3   2   750.47   719.16    26.38 o
   2   3   2   111.24   122.21     6.15 o
   4   3   2   860.45   895.88    28.13 o
   5   3   2   188.56   188.14     9.67 o
   6   3   2  1142.73  1171.94    42.20 o
   7   3   2  2015.88  2240.14    87.04 o
   8   3   2  1104.18  1101.61    34.29 o
  10   3   2  1145.22  1205.35    37.80 o
  12   3   2   312.81   312.99    14.95 o
  14   3   2    60.20    71.21     7.91 o
  15   3   2   185.39   172.32    13.19 o
  16   3   2    88.91    85.28    10.55 o
  17   3   2   330.62   200.45   111.65 <
  18   3   2    27.31    25.50     7.03 o
 -17   4   2    28.15    31.65     7.03 o
 -15   4   2     6.61     7.91     7.03 <
 -14   4   2  1433.04  1504.27    67.70 o
 -13   4   2    98.81   113.41    11.43 o
 -11   4   2    98.80   113.41     9.67 o
  -9   4   2    28.07    21.98     3.52 o
  -7   4   2     1.63    -5.28     4.40 <
  -6   4   2   122.75   109.02     6.15 o
  -5   4   2    28.91    21.98     6.15 o
  -3   4   2    86.98    87.92     5.28 o
  -2   4   2   434.17   392.99    14.07 o
  -1   4   2     6.72    14.95     3.52 o
   0   4   2    90.86    88.80     5.28 o
   1   4   2   256.69   271.67    10.55 o
   3   4   2    20.05     8.79     4.40 <
   5   4   2    37.50    33.41     5.28 o
   7   4   2     2.41     2.64     3.52 <
   9   4   2     0.09     5.28     5.28 <
  11   4   2     0.35     4.40     5.28 <
  13   4   2    51.38    46.60     8.79 o
  15   4   2    37.97    36.93     7.03 o
 -14   5   2    93.09    87.04    12.31 o
 -13   5   2   251.99   217.16    13.19 o
 -10   5   2   266.58   250.57    15.83 o
  -8   5   2    55.27    54.51     4.40 o
  -6   5   2    13.95    21.98     5.28 o
  -5   5   2   491.60   485.30    19.34 o
  -4   5   2    82.67   100.23     6.15 o
  -3   5   2   888.46   831.70    27.25 o
  -1   5   2   259.12   253.20    14.95 o
   0   5   2     0.84    12.31     5.28 <
   1   5   2   227.91   240.89    11.43 o
   2   5   2    15.98    18.46     5.28 o
   3   5   2   113.56   127.48     8.79 o
   4   5   2   111.08    88.80     6.15 o
   6   5   2   461.94   495.86    17.58 o
   7   5   2   201.38   198.69    10.55 o
   8   5   2   434.52   430.80    18.46 o
   9   5   2   540.59   640.04    30.77 o
  10   5   2   226.86   225.07     9.67 o
  11   5   2  2368.66  2321.02   116.93 o
  12   5   2    12.66    10.55     6.15 <
  -9   6   2   108.25   140.67    14.95 o
  -5   6   2    19.22    11.43     4.40 <
  -4   6   2    24.68     7.91     5.28 <
  -3   6   2     6.89     0.88     4.40 <
  -2   6   2   439.43   491.46    20.22 o
  -1   6   2     5.64    10.55     4.40 <
   0   6   2    24.04    33.41     4.40 o
   1   6   2     1.86    -0.88     4.40 <
   3   6   2    16.01     5.28     5.28 <
   5   6   2    62.72    64.18     6.15 o
   6   6   2  2557.58  2490.70    76.49 o
   7   6   2    39.58    57.15     5.28 o
   9   6   2    20.48    32.53     7.03 o
  -6   7   2    17.39    25.50     6.15 o
  -5   7   2    42.81     4.40     5.28 <
  -4   7   2     0.33     3.52     8.79 <
  -3   7   2   277.98   320.02    14.07 o
   1   7   2   303.00   308.59    14.07 o
   2   7   2    10.55     6.15     4.40 <
   5   7   2     4.91     1.76     6.15 <
   6   7   2    90.76    57.15     8.79 o
  -8   0   3 11178.70 11783.60   499.37 o
  -6   0   3  6917.55  6888.34   291.89 o
  -2   0   3 10407.70 11702.70   496.73 o
   2   0   3 31333.40 35733.20  1512.18 o
   8   0   3  2096.53  1933.31    82.64 o
  12   0   3   210.23   199.57    11.43 o
  14   0   3   181.19   169.68    10.55 o
 -17   1   3   476.34   481.79    22.86 o
 -16   1   3   205.18   179.35    10.55 o
 -14   1   3    27.71    30.77     5.28 o
 -13   1   3    59.48    47.48     8.79 o
 -12   1   3     3.72     1.76     7.03 <
 -11   1   3  5508.54  6136.64   260.24 o
 -10   1   3   432.23   389.47    19.34 o
  -9   1   3  6945.05  7784.21   466.84 o
  -8   1   3   185.63   164.41     9.67 o
  -7   1   3   456.00   473.00    21.98 o
  -5   1   3  6781.77  6532.27   196.06 o
  -2   1   3   554.48   522.23    16.70 o
   0   1   3  2625.17  2585.65    90.56 o
   2   1   3  2314.05  2214.64    77.37 o
   4   1   3  1912.36  1787.36    54.51 o
   6   1   3   328.25   367.49    12.31 o
   8   1   3     5.71     5.28     2.64 <
   9   1   3    51.10    51.87     5.28 o
  10   1   3    78.60    77.37     6.15 o
  11   1   3  2049.63  2257.72    69.45 o
  12   1   3   111.06   102.86     5.28 o
  14   1   3   102.63    95.83     7.03 o
  15   1   3   232.68   204.85    14.07 o
  16   1   3     0.39     2.64     6.15 <
  17   1   3    60.39    64.18     8.79 o
  18   1   3    36.87    32.53     8.79 o
 -17   2   3    36.42    19.34     7.03 <
 -16   2   3  1819.69  1811.98   111.65 o
 -15   2   3     0.30     1.76     6.15 <
 -14   2   3    34.86    19.34     6.15 o
 -13   2   3    26.95    20.22     6.15 o
 -12   2   3     3.95    16.70     6.15 <
 -11   2   3     5.71    13.19     5.28 <
 -10   2   3  1186.02  1088.42    48.35 o
  -9   2   3    39.07    41.32     6.15 o
  -6   2   3  5457.62  5446.49   232.10 o
  -5   2   3     4.39     1.76     2.64 <
  -1   2   3    12.80     8.79     3.52 <
   2   2   3 27143.50 25861.80   777.19 o
   5   2   3     5.87    -5.28     2.64 <
   6   2   3 36076.00 32044.20   960.06 o
   7   2   3    62.98    50.11     4.40 o
   9   2   3    70.03    54.51     4.40 o
  10   2   3   131.58   130.12     7.03 o
  12   2   3   422.20   395.63    15.83 o
  13   2   3     0.34     6.15     5.28 <
  14   2   3   389.39   431.67    22.86 o
  15   2   3    28.75    26.38     7.03 o
  16   2   3  1007.93  1093.69    50.11 o
  17   2   3    11.64    -4.40     7.03 <
  18   2   3    22.90     8.79     7.91 <
 -18   3   3   252.27   227.71    20.22 o
 -16   3   3    64.81    68.58     7.91 o
 -15   3   3   132.80   116.05    10.55 o
 -14   3   3    65.62    73.85     8.79 o
 -12   3   3    15.19    14.07     7.03 <
 -11   3   3  2867.74  2578.62   111.65 o
 -10   3   3     4.91     0.88     6.15 <
  -9   3   3  3057.02  3054.25   131.88 o
  -8   3   3    60.06    62.42     4.40 o
  -6   3   3     1.82     3.52     3.52 <
  -3   3   3  1671.35  1467.34    54.51 o
  -2   3   3  1912.07  1838.35    56.27 o
   0   3   3  1811.44  1940.34    69.45 o
   2   3   3  2547.05  2688.52    94.95 o
   3   3   3  1901.48  2225.19    96.71 o
   4   3   3   579.10   603.11    22.86 o
   6   3   3  1118.06  1100.73    34.29 o
   8   3   3     7.63     2.64     4.40 <
  10   3   3     7.02     5.28     4.40 <
  12   3   3    71.17    72.97     6.15 o
  13   3   3     1.67    10.55     5.28 <
  14   3   3    14.00     2.64     7.03 <
  15   3   3    72.29    50.99     7.91 o
  16   3   3     0.98     5.28     7.03 <
  17   3   3     1.71   -11.43     7.03 <
  18   3   3    62.58    41.32     9.67 o
 -17   4   3     0.39     0.88     6.15 <
 -16   4   3    10.72     1.76     6.15 <
 -15   4   3    49.44    65.94     8.79 o
 -13   4   3     0.46     7.91     7.91 <
 -12   4   3   729.91   643.56    30.77 o
 -11   4   3    77.81    89.68     8.79 o
 -10   4   3     9.65    22.86     6.15 o
  -9   4   3    10.20     9.67     3.52 <
  -7   4   3    70.53    80.88     7.91 o
  -5   4   3   114.30   123.96     8.79 o
  -4   4   3     8.44    -9.67     3.52 <
  -3   4   3    73.62    80.00     5.28 o
  -1   4   3   103.60   116.93     6.15 o
   1   4   3    54.00    63.30     5.28 o
   3   4   3   185.86   192.54     8.79 o
   5   4   3    93.05   103.74     6.15 o
   6   4   3   167.89   167.92     8.79 o
   7   4   3    24.64    21.10     4.40 o
   9   4   3   220.71   249.69    10.55 o
  10   4   3    12.48     4.40     4.40 <
  11   4   3     0.07     2.64     5.28 <
  12   4   3    27.12     6.15     5.28 <
  13   4   3    13.05    20.22     7.03 <
  15   4   3    91.25   109.02     9.67 o
 -14   5   3    17.28     7.91     7.91 <
 -13   5   3    64.26    61.54     7.03 o
 -12   5   3    13.20    27.25     6.15 o
 -11   5   3  1369.34  1302.06    58.03 o
  -9   5   3   659.85   680.48    32.53 o
  -8   5   3     1.64     0.00     3.52 <
  -7   5   3    97.78    92.31     5.28 o
  -6   5   3     8.11    11.43     4.40 <
  -5   5   3   642.82   558.28    19.34 o
  -3   5   3     0.82    -6.15     4.40 <
  -2   5   3    30.99    13.19     4.40 <
   1   5   3  1865.76  2044.96    72.97 o
   2   5   3   553.71   524.87    18.46 o
   3   5   3  1035.20  1100.73    35.17 o
   6   5   3    21.27    13.19     4.40 <
   9   5   3     0.37     2.64     4.40 <
  10   5   3    24.09    36.93     4.40 o
  12   5   3     0.05    -1.76     8.79 <
  -9   6   3     0.09    -3.52     7.03 <
  -6   6   3   371.91   386.84    14.07 o
  -4   6   3   382.18   363.10    14.07 o
   5   6   3    18.04     6.15     4.40 <
   6   6   3  2556.90  2471.36    81.76 o
  -6   7   3     5.68     3.52     6.15 <
  -5   7   3     2.76    11.43     5.28 <
   4   7   3    15.85     7.91     5.28 <
   5   7   3    12.42     0.88     6.15 <
 -12   0   4   387.69   369.25    17.58 o
 -10   0   4   286.58   309.47    14.07 o
  -8   0   4 22473.20 23600.60   996.98 o
  -6   0   4 15789.10 14601.30   618.06 o
  -4   0   4 13176.80 11910.20   504.65 o
   0   0   4 13211.50 14289.20   603.99 o
   2   0   4  6448.87  6419.74   271.67 o
   8   0   4   311.47   310.35    21.10 o
  12   0   4    55.46    51.87     7.03 o
 -17   1   4   482.70   473.00    32.53 o
 -16   1   4   121.53   106.38     8.79 o
 -14   1   4    77.24    86.16     7.91 o
 -12   1   4     3.95    12.31     7.03 <
 -10   1   4   160.63   147.70     8.79 o
  -9   1   4  5148.74  5784.97   245.29 o
  -8   1   4   555.59   530.14    19.34 o
  -6   1   4  1684.32  1677.47    50.99 o
  -4   1   4  1929.94  1976.39    59.78 o
  -2   1   4  1493.18  1431.30    43.96 o
  -1   1   4 37693.60 41213.10  1243.15 o
   1   1   4 10958.90 10100.80   303.32 o
   2   1   4    46.87    59.78     4.40 o
   3   1   4  6706.80  7742.01   268.15 o
   4   1   4   251.70   253.20    10.55 o
   5   1   4 23048.20 25584.90   883.57 o
   6   1   4   145.01   171.44     9.67 o
   8   1   4     2.38    -0.88     3.52 <
   9   1   4  8697.71  8315.24   249.69 o
  10   1   4     0.50     6.15     4.40 <
  12   1   4   130.80   143.30     7.91 o
  14   1   4   326.68   324.42    14.07 o
  16   1   4   287.62   239.14    11.43 o
 -18   2   4    24.91     9.67     6.15 <
 -17   2   4     0.10     1.76     6.15 <
 -15   2   4     0.83    -0.88     6.15 <
 -14   2   4    53.23    29.89     6.15 o
 -13   2   4    20.39    21.98     5.28 o
 -12   2   4   848.26   841.37    37.80 o
 -11   2   4    17.86    17.58     5.28 o
 -10   2   4   304.30   367.49    18.46 o
  -9   2   4    41.27    40.44     6.15 o
  -7   2   4    34.38    25.50     2.64 o
  -6   2   4 86662.60 78942.90  2729.84 o
  -5   2   4     0.61     3.52     3.52 <
  -4   2   4  1736.56  1612.41    70.33 o
  -3   2   4     0.55    -1.76     2.64 <
  -2   2   4 49982.20 49838.70  1722.30 o
   0   2   4 12295.00 12777.00   443.10 o
   1   2   4   111.37   100.23     5.28 o
   2   2   4 10456.20  9728.95   293.64 o
   4   2   4  4761.09  4888.21   147.70 o
   7   2   4    78.16    65.06     4.40 o
   8   2   4  5222.81  5734.86   173.20 o
   9   2   4    25.97    20.22     5.28 o
  10   2   4  6538.74  6188.51   215.40 o
  11   2   4    19.93    19.34     5.28 o
  12   2   4    79.72    72.97     7.91 o
  13   2   4     7.61     1.76     4.40 <
  14   2   4  1221.62  1077.87    59.78 o
  15   2   4     0.22     3.52     7.03 <
  16   2   4    82.80    80.88     9.67 o
  17   2   4     7.52    20.22     7.91 <
 -18   3   4     0.40     2.64     6.15 <
 -16   3   4     0.33     3.52     6.15 <
 -14   3   4    22.18    23.74     6.15 o
 -13   3   4     2.00     9.67     6.15 <
 -12   3   4     6.03     3.52     8.79 <
 -10   3   4    51.40    55.39     9.67 o
  -9   3   4  2929.06  2992.71   129.24 o
  -8   3   4   638.60   633.89    20.22 o
  -6   3   4  1880.03  1886.71    58.03 o
  -4   3   4  1859.77  1884.07    66.82 o
  -2   3   4  1253.86  1239.64    38.68 o
  -1   3   4  8670.40  7607.50   271.67 o
   0   3   4   616.16   620.70    29.01 o
   2   3   4   203.14   208.36     8.79 o
   3   3   4  1088.15   990.83    36.93 o
   4   3   4    11.24     9.67     3.52 <
   5   3   4 11314.90 10835.00   378.05 o
   6   3   4   569.45   511.68    17.58 o
   7   3   4    40.53    -7.91     7.03 <
   8   3   4    85.96    70.33     5.28 o
  10   3   4    26.96    24.62     4.40 o
  11   3   4     8.52     0.00     4.40 <
  12   3   4   289.08   272.54    11.43 o
  13   3   4   240.93   100.23    43.08 <
  14   3   4   195.91   203.97    14.07 o
  15   3   4   321.32   185.51    46.60 o
  16   3   4   190.03   232.10    14.07 o
 -17   4   4     1.74     3.52     6.15 <
 -15   4   4     0.38     0.88     6.15 <
 -14   4   4    29.16    20.22     9.67 <
 -13   4   4     9.62    17.58     8.79 <
 -12   4   4   204.95   170.56    11.43 o
 -11   4   4    64.73    71.21     7.91 o
  -9   4   4    75.31    78.25     4.40 o
  -7   4   4   206.57   226.83    11.43 o
  -5   4   4    11.00     5.28     3.52 <
  -3   4   4   226.84   227.71     9.67 o
  -1   4   4    67.16    85.28     6.15 o
   1   4   4    22.97    14.95     4.40 o
   2   4   4   795.98   750.82    25.50 o
   3   4   4    79.26    80.88     7.03 o
   4   4   4   186.62   166.16     7.91 o
   5   4   4     5.94     6.15     4.40 <
   6   4   4   156.63   180.23     9.67 o
   7   4   4    17.14    14.95     4.40 o
   8   4   4   222.60   211.00    10.55 o
   9   4   4   135.53   144.18     7.03 o
  10   4   4    39.78    37.80     5.28 o
  11   4   4    11.72     7.91     4.40 <
  12   4   4     2.86     6.15     5.28 <
  13   4   4     0.63     0.00     7.03 <
  15   4   4     5.59    20.22    14.07 <
 -14   5   4     8.90    -5.28    12.31 <
 -13   5   4    41.54    12.31     6.15 <
 -12   5   4    21.59    28.13     6.15 o
 -11   5   4   266.24   232.98    14.07 o
  -9   5   4   192.85   227.71   175.84 <
  -8   5   4   225.05   226.83    10.55 o
  -6   5   4   345.54   303.32    11.43 o
  -5   5   4   729.52   729.72    23.74 o
  -4   5   4   501.15   509.04    19.34 o
  -2   5   4   505.20   526.63    21.10 o
  -1   5   4  4389.01  4631.49   140.67 o
   3   5   4   994.30  1051.49    39.56 o
   4   5   4    29.27    26.38     5.28 o
   5   5   4  2237.56  2095.07    65.06 o
   7   5   4    26.71     3.52     4.40 <
   8   5   4    29.15    39.56     5.28 o
  10   5   4     1.09     5.28     4.40 <
  -9   6   4     2.80    20.22     7.91 <
  -6   6   4  6204.12  5868.49   189.90 o
  -5   6   4    12.70    17.58     4.40 o
  -2   6   4  2742.46  2564.55    79.13 o
  -1   6   4    23.26    11.43     4.40 <
   1   6   4    53.49    22.86     6.15 o
   2   6   4   717.49   711.25    23.74 o
   3   6   4    28.43    21.10   241.77 <
   4   6   4   221.58   227.71    10.55 o
   5   6   4    11.30    26.38     5.28 o
   7   6   4     0.08     0.88     5.28 <
   9   6   4     3.08     3.52     6.15 <
  -5   7   4    76.50    80.00     7.91 o
  -4   7   4   153.91   150.34    15.83 o
  -3   7   4   588.21   717.41    47.48 o
  -2   7   4    62.41    36.05     7.03 o
   2   7   4    18.09    34.29     6.15 o
   4   7   4     0.12    -1.76     5.28 <
   5   7   4   416.61   464.20    32.53 o
 -12   0   5  1353.05  1461.19    89.68 o
  -8   0   5 10084.90 10156.20   429.92 o
  -4   0   5  1244.88  1344.26    58.03 o
  -2   0   5  5831.31  6659.75   283.09 o
   0   0   5  1275.19  1368.00    58.90 o
   2   0   5 16706.00 15932.40   952.15 o
   4   0   5 17198.30 19544.90   827.30 o
   6   0   5 13549.70 16703.40   998.74 o
  16   0   5   593.15   709.49    46.60 o
 -17   1   5   300.36   312.99    22.86 o
 -16   1   5    56.68    45.72     7.03 o
 -14   1   5   355.85   376.29    19.34 o
 -12   1   5   466.89   451.02    21.98 o
 -11   1   5  4825.65  5380.55   323.54 o
 -10   1   5   764.75   835.22    36.93 o
  -8   1   5   745.09   705.98    21.98 o
  -6   1   5   214.82   226.83     8.79 o
  -4   1   5    10.44     9.67     2.64 o
   0   1   5   128.50   131.00     7.03 o
   1   1   5 17515.70 20582.40   870.38 o
   2   1   5   230.55   218.91     9.67 o
   6   1   5   324.75   343.76    14.07 o
   8   1   5  1323.71  1298.54    40.44 o
  10   1   5   949.71   901.15    29.01 o
  12   1   5   775.95   698.94    33.41 o
  14   1   5    57.40    68.58     6.15 o
  15   1   5   247.57   248.81    14.95 o
  16   1   5    70.32    54.51     6.15 o
  17   1   5  1079.55  1040.94    48.35 o
 -18   2   5     4.86     3.52     7.03 <
 -17   2   5     6.46     6.15     7.91 <
 -16   2   5   275.26   236.50    14.07 o
 -15   2   5    13.47    13.19     7.91 <
 -14   2   5  1175.30  1180.73    52.75 o
 -13   2   5    59.94    57.15     7.03 o
 -12   2   5  2959.29  3389.22   145.06 o
 -11   2   5     7.37     7.91     5.28 <
 -10   2   5 10057.00 10774.30   457.17 o
  -9   2   5    56.11    65.06     7.03 o
  -8   2   5  1254.61  1348.65    49.23 o
  -7   2   5    50.09    57.15     4.40 o
  -6   2   5  5580.43  5317.25   184.63 o
  -3   2   5    10.17    13.19     3.52 o
  -1   2   5   167.76   157.37     7.91 o
   0   2   5    62.88    73.85     5.28 o
   1   2   5    22.06     8.79     4.40 <
   2   2   5 10363.70 11367.70   393.87 o
   3   2   5   137.88   131.00     7.03 o
   5   2   5     1.15     2.64     3.52 <
   7   2   5     0.14    -3.52     3.52 <
   9   2   5    35.05    20.22     5.28 o
  10   2   5  3406.74  3296.03   100.23 o
  11   2   5    23.71    23.74     4.40 o
  13   2   5     0.10     4.40     4.40 <
  15   2   5    28.36    16.70     5.28 o
  17   2   5     0.54    10.55     7.91 <
  18   2   5    11.65     2.64    12.31 <
 -18   3   5    31.63    29.01     8.79 o
 -17   3   5   106.23    78.25    12.31 o
 -16   3   5     1.06     1.76     6.15 <
 -15   3   5     4.86    12.31     7.91 <
 -14   3   5   477.01   554.76    27.25 o
 -13   3   5  2919.68  2503.89   109.02 o
 -12   3   5   502.76   499.37    25.50 o
 -11   3   5  2953.64  2823.91   174.08 o
 -10   3   5  1739.42  1834.84    80.00 o
  -8   3   5   135.47   145.94     7.91 o
  -6   3   5   220.80   234.74     8.79 o
  -5   3   5   814.73   839.61    31.65 o
  -4   3   5   272.36   255.84     9.67 o
  -2   3   5   103.48   118.69     6.15 o
   0   3   5   441.50   401.78    14.07 o
   2   3   5    10.48     7.91     3.52 <
   3   3   5     1.36     6.15     5.28 <
   6   3   5   773.27   768.40    29.01 o
   8   3   5   345.78   336.72    14.07 o
   9   3   5    23.52   -27.25    62.42 <
  10   3   5   360.00   357.82    13.19 o
  11   3   5   208.56   125.72   101.11 <
  12   3   5    80.43    83.52     6.15 o
  13   3   5    50.04    46.60     5.28 o
  14   3   5   105.71    96.71     8.79 o
  15   3   5    27.39    -7.03     7.03 <
  16   3   5     0.22     5.28     7.03 <
 -17   4   5    14.39    12.31     8.79 <
 -15   4   5     2.24     5.28     6.15 <
 -13   4   5    56.24    70.33     8.79 o
 -11   4   5    96.91   128.36     9.67 o
  -9   4   5     1.39     0.00     3.52 <
  -7   4   5   167.39   183.75     7.91 o
  -5   4   5    31.97    41.32     5.28 o
  -4   4   5   253.06   242.65     9.67 o
  -3   4   5    49.45    46.60     4.40 o
  -1   4   5    11.54     6.15     4.40 <
   1   4   5     4.42     3.52     3.52 <
   2   4   5  3246.74  2986.56   108.14 o
   3   4   5   403.73   429.92    14.95 o
   4   4   5  3305.32  3101.73   109.02 o
   5   4   5    25.00    21.98     4.40 o
   7   4   5   115.42   106.38     6.15 o
   9   4   5    30.99    41.32     5.28 o
  11   4   5     6.14     7.03     4.40 <
  13   4   5     6.14    17.58     7.03 <
  14   4   5    53.27    40.44    10.55 o
 -13   5   5   690.21   563.55    38.68 o
 -12   5   5   158.54   163.53    11.43 o
 -11   5   5   901.33   844.89    39.56 o
 -10   5   5    71.05    41.32     7.03 o
  -9   5   5    45.91    87.92    68.58 <
  -7   5   5     0.04     7.03     4.40 <
  -6   5   5    45.73    44.84     4.40 o
  -5   5   5    15.89     5.28     4.40 <
  -3   5   5   201.27   182.87    10.55 o
  -2   5   5    82.37    96.71     6.15 o
  -1   5   5   112.97   104.62     7.91 o
   1   5   5   229.95   222.43     9.67 o
   4   5   5    18.35    19.34     5.28 o
   5   5   5    46.17    31.65     5.28 o
   8   5   5   383.10   423.76    18.46 o
   9   5   5    62.29     5.28   260.24 <
  10   5   5   279.12   265.51    13.19 o
  11   5   5    42.73    18.46   363.10 <
  -7   6   5     8.57     1.76     4.40 <
  -2   6   5    30.42    21.98     4.40 o
  -1   6   5     2.33     1.76     5.28 <
   0   6   5     2.73    15.83     6.15 <
   2   6   5   676.07   774.55    29.89 o
   5   6   5    52.04    50.99     5.28 o
   7   6   5    38.73    37.80     7.03 o
   9   6   5    77.56    87.04    14.07 o
  -5   7   5    99.87    67.70     9.67 o
  -3   7   5    12.72     3.52     5.28 <
  -2   7   5     0.13     1.76     5.28 <
  -1   7   5    20.64    21.98     6.15 o
   2   7   5     6.98    24.62     7.91 o
   3   7   5    55.54    40.44     9.67 o
   4   7   5    31.29    47.48     8.79 o
   5   7   5   204.26   158.25   231.22 <
 -14   0   6  1002.97   989.07    43.08 o
 -12   0   6  5987.63  5988.94   254.08 o
   4   0   6 49533.10 53704.40  2269.15 o
   8   0   6 14840.50 16425.60   699.82 o
  10   0   6 10876.60 12698.80   538.05 o
  14   0   6  3710.32  4628.86   279.58 o
  16   0   6   526.96   529.26    26.38 o
 -16   1   6   199.18   180.23    11.43 o
 -15   1   6  2029.01  2307.83    99.35 o
 -14   1   6   256.49   259.36    14.07 o
 -12   1   6    55.79    58.03     6.15 o
 -10   1   6     0.45     0.00     2.64 <
  -9   1   6 18369.00 20186.70   698.07 o
  -8   1   6   339.28   295.40    11.43 o
  -5   1   6  9788.18 10571.20   317.38 o
  -4   1   6     0.14     2.64     2.64 <
  -2   1   6   586.08   574.98    21.10 o
   0   1   6  1321.10  1506.03    53.63 o
   2   1   6  2394.00  2366.74    83.52 o
   4   1   6  2211.22  2218.16    67.70 o
   6   1   6  1245.00  1290.63    40.44 o
   7   1   6 19151.80 21883.50   655.86 o
   8   1   6   394.99   383.32    13.19 o
  10   1   6     3.41    -3.52     3.52 <
  11   1   6  3302.98  3565.05   109.02 o
  12   1   6     2.21     0.88     4.40 <
  14   1   6    60.03    55.39     6.15 o
  16   1   6     0.38     4.40     6.15 <
 -18   2   6  5145.94  5047.34   424.64 o
 -17   2   6    26.35    34.29     9.67 o
 -16   2   6     8.23    14.95     7.03 <
 -15   2   6    20.57    19.34     6.15 o
 -14   2   6  6965.59  8080.50   397.39 o
 -13   2   6     1.33     5.28     6.15 <
 -12   2   6  1168.92  1314.37    58.03 o
 -11   2   6    27.03    24.62     6.15 o
 -10   2   6  1190.66  1326.67    58.90 o
  -9   2   6    91.35    90.56     5.28 o
  -7   2   6    48.73    43.96     4.40 o
  -6   2   6   215.19   218.04     9.67 o
  -5   2   6     1.94    -3.52     3.52 <
  -4   2   6   331.60   329.69    13.19 o
  -3   2   6    24.58    11.43     3.52 o
  -1   2   6    30.50    20.22     3.52 o
   0   2   6  1455.08  1615.92    49.23 o
   1   2   6     5.28     0.00     3.52 <
   2   2   6 20328.00 21763.10   652.35 o
   4   2   6    44.69    43.96     4.40 o
   5   2   6     0.12     3.52     4.40 <
   6   2   6   620.70   594.32    19.34 o
   8   2   6    31.94    48.35     6.15 o
   9   2   6    29.60    19.34     4.40 o
  10   2   6  6744.58  7123.08   215.40 o
  11   2   6     1.43    -2.64     4.40 <
  13   2   6     0.14     0.00     4.40 <
  15   2   6     3.82     2.64     5.28 <
  16   2   6  1035.05   841.37    56.27 o
  17   2   6     4.54    12.31     7.91 <
 -18   3   6   238.12   256.72    29.01 o
 -16   3   6   184.19   203.09    13.19 o
 -15   3   6  1750.63  1623.84   101.98 o
 -14   3   6   127.78   159.13    11.43 o
 -12   3   6     2.28     2.64     6.15 <
 -11   3   6  1796.66  1613.29   100.23 o
 -10   3   6    52.75    45.72     7.03 o
  -8   3   6     2.54     9.67     3.52 <
  -7   3   6   947.68   919.62    42.20 o
  -6   3   6    12.44    16.70     5.28 o
  -4   3   6    80.80    79.13     6.15 o
  -3   3   6   441.61   464.20    18.46 o
  -2   3   6     0.49     3.52     4.40 <
  -1   3   6   775.19   746.42    24.62 o
   0   3   6   520.58   524.87    17.58 o
   1   3   6   369.49   350.79    14.95 o
   2   3   6   889.00   907.31    29.01 o
   4   3   6   560.90   583.77    19.34 o
   5   3   6  5560.37  5312.85   232.10 o
   6   3   6   182.77   196.06     8.79 o
   7   3   6  7882.46  7544.20   227.71 o
   8   3   6   135.28   142.43     7.03 o
   9   3   6  2348.66  2110.02    91.43 o
  10   3   6     3.33     1.76     4.40 <
  12   3   6     0.86     1.76     4.40 <
  14   3   6    49.06    45.72     6.15 o
  15   3   6    58.82    58.90     8.79 o
 -17   4   6     6.29     7.03     7.91 <
 -15   4   6    39.12    43.08     7.03 o
 -14   4   6   184.64   163.53    12.31 o
 -13   4   6    77.15    84.40     8.79 o
 -11   4   6    41.30    46.60     7.03 o
 -10   4   6    56.22    63.30     7.91 o
  -9   4   6     3.28     0.00     3.52 <
  -7   4   6    44.53    52.75     5.28 o
  -5   4   6     0.02     0.88     4.40 <
  -3   4   6   100.66   101.11     7.03 o
  -1   4   6   142.79   127.48     7.03 o
   1   4   6     0.21     2.64     5.28 <
   5   4   6     6.41     5.28     4.40 <
   7   4   6     2.46     8.79     5.28 <
   9   4   6     0.65     0.00     4.40 <
  11   4   6     9.29     9.67     5.28 <
  13   4   6    16.36    14.07    10.55 <
 -13   5   6   292.50   276.94    21.98 o
 -12   5   6    51.55    65.06     7.03 o
 -10   5   6     3.31     8.79     6.15 <
  -9   5   6  2123.10  2017.71    79.13 o
  -7   5   6   193.71   167.04     7.91 o
  -5   5   6  1832.21  1754.83    54.51 o
  -4   5   6     0.92    -1.76     5.28 <
  -3   5   6     5.60     4.40     4.40 <
  -2   5   6   226.88   246.17    11.43 o
   0   5   6   114.82   105.50     7.03 o
   1   5   6   370.55   361.34    16.70 o
   2   5   6   386.57   387.72    14.95 o
   3   5   6    53.15    55.39     7.03 o
   4   5   6   453.41   471.24    16.70 o
   5   5   6   891.27   812.36    30.77 o
   6   5   6   358.96   376.29    14.95 o
   7   5   6  2882.87  2510.92    77.37 o
   8   5   6    53.19    51.87     5.28 o
   9   5   6   123.95   118.69     7.91 o
  10   5   6    26.31    31.65     7.91 o
  -7   6   6     0.14     1.76     5.28 <
  -6   6   6    14.70     4.40     4.40 <
  -4   6   6    32.81    43.96     5.28 o
  -3   6   6     7.94     0.88     4.40 <
  -1   6   6    60.16    87.92     7.91 o
   1   6   6    13.03    13.19     4.40 <
   5   6   6     0.25     4.40     7.03 <
   7   6   6   106.78   110.78    11.43 o
   8   6   6    36.13    14.07    12.31 <
  -4   7   6     0.63     0.00     5.28 <
  -3   7   6   194.48   220.67    13.19 o
  -2   7   6     8.71     8.79     5.28 <
 -12   0   7  1485.22  1605.37    97.59 o
 -10   0   7  3040.50  2944.36   125.72 o
  -6   0   7 16557.30 19439.40   822.03 o
   0   0   7 52570.30 58933.70  2495.98 o
   2   0   7  5665.38  5239.00   222.43 o
   6   0   7  5228.81  6187.63   263.75 o
  12   0   7    13.13    29.89     7.91 o
 -17   1   7   620.37   603.99    39.56 o
 -16   1   7     0.06     5.28     5.28 <
 -15   1   7   647.48   685.76    31.65 o
 -14   1   7    51.24    44.84     6.15 o
 -13   1   7  1263.01  1341.62    58.90 o
 -12   1   7    14.78    19.34     3.52 o
 -11   1   7  2137.68  1972.87    60.66 o
 -10   1   7     3.42     7.91     3.52 <
  -8   1   7   333.55   323.54    11.43 o
  -6   1   7   889.06   858.08    30.77 o
  -4   1   7  2060.82  2017.71    61.54 o
  -2   1   7  1870.20  2041.44    71.21 o
   0   1   7  1763.81  1732.85    61.54 o
   2   1   7   211.81   218.91     7.91 o
   3   1   7  5151.68  4604.24   138.91 o
   4   1   7    17.00    -2.64     3.52 <
   5   1   7  6551.15  7324.41   221.55 o
   8   1   7    15.03    21.10     4.40 o
   9   1   7   244.78   220.67     8.79 o
  10   1   7     8.02     5.28     3.52 <
  12   1   7    13.20    10.55     5.28 <
  14   1   7    75.09    80.88     6.15 o
  16   1   7   224.36   189.90    11.43 o
  17   1   7   640.88   695.43    33.41 o
 -17   2   7    22.39    23.74     7.03 o
 -16   2   7   180.39   177.59    16.70 o
 -15   2   7    11.75     0.88     6.15 <
 -13   2   7    44.00    34.29     9.67 o
 -12   2   7  2684.54  2988.32   129.24 o
 -11   2   7    47.47    45.72     7.03 o
 -10   2   7  4125.82  4023.10   122.21 o
  -9   2   7    14.46    19.34     4.40 o
  -8   2   7  4612.93  4806.45   145.94 o
  -7   2   7    37.81    31.65     3.52 o
  -6   2   7   100.27   106.38     7.03 o
  -5   2   7     0.78     2.64     3.52 <
  -4   2   7  6619.47  7087.91   213.64 o
  -3   2   7    28.61    21.98     4.40 o
  -2   2   7  8896.12  9996.22   301.56 o
  -1   2   7    28.09    29.01     3.52 o
   1   2   7    13.21     6.15     3.52 <
   4   2   7   114.70    89.68     6.15 o
   5   2   7    17.09    16.70     4.40 o
   6   2   7   320.33   324.42    14.07 o
   7   2   7    22.41     5.28     4.40 <
   8   2   7   496.57   481.79    19.34 o
   9   2   7    91.24    98.47     6.15 o
  11   2   7     3.11     5.28     5.28 <
  12   2   7  1245.84  1331.07    43.08 o
  13   2   7    52.22    43.96     6.15 o
  14   2   7     1.91     5.28     7.03 <
  15   2   7     1.97     0.00     5.28 <
  17   2   7     2.16     0.88    12.31 <
 -16   3   7    77.65    88.80    13.19 o
 -15   3   7   161.12   142.43    11.43 o
 -14   3   7    53.92    59.78     7.91 o
 -12   3   7   154.48   185.51    12.31 o
 -10   3   7     5.70     2.64     4.40 <
  -9   3   7    18.02     6.15     3.52 <
  -8   3   7     5.77    12.31     3.52 o
  -7   3   7   218.48   240.89    14.95 o
  -6   3   7   766.53   876.54    39.56 o
  -4   3   7   664.68   754.33    24.62 o
  -2   3   7  1386.56  1567.57    48.35 o
   1   3   7   125.49   116.93     7.91 o
   2   3   7   194.92   191.66     8.79 o
   3   3   7  2011.07  1914.84    83.52 o
   4   3   7    11.35    11.43     4.40 <
   5   3   7  3552.72  3647.70   139.79 o
   6   3   7     1.23    -2.64     4.40 <
   7   3   7    39.31    32.53     5.28 o
   8   3   7   315.51   341.12    16.70 o
   9   3   7    10.54     0.00     6.15 <
  10   3   7     1.84    -3.52     4.40 <
  12   3   7     1.14     2.64     4.40 <
 -15   4   7     0.49     2.64     6.15 <
 -13   4   7    32.44    37.80     7.03 o
 -11   4   7    17.14    21.98     9.67 <
  -9   4   7    48.06    44.84     5.28 o
  -8   4   7    94.87   102.86     7.03 o
  -7   4   7    13.88    21.10     4.40 o
  -5   4   7   209.62   213.64     9.67 o
  -3   4   7    76.32    84.40     6.15 o
  -1   4   7     2.22    -7.03     5.28 <
   1   4   7   104.11   100.23     8.79 o
   2   4   7  1358.74  1291.51    48.35 o
   3   4   7    30.00    46.60     7.03 o
   5   4   7   160.97   174.08    10.55 o
   7   4   7     0.09    -7.03     6.15 <
   8   4   7    48.07    42.20     5.28 o
   9   4   7    97.78    94.95     7.91 o
  10   4   7   298.79   283.97    14.07 o
  12   4   7     0.15    13.19     6.15 <
 -12   5   7     0.53     4.40     7.91 <
 -11   5   7   132.64   158.25    11.43 o
 -10   5   7     2.56     7.03     6.15 <
  -9   5   7   235.59   205.73    10.55 o
  -8   5   7   116.44   138.03     7.03 o
  -7   5   7    20.47    21.98     4.40 o
  -6   5   7    99.28    75.61     6.15 o
  -5   5   7    44.87    52.75     7.03 o
  -4   5   7   348.50   367.49    15.83 o
  -3   5   7     1.47    -2.64     7.03 <
  -2   5   7   150.08   135.39     7.91 o
  -1   5   7    56.38    56.27     7.03 o
   1   5   7   242.81   238.26    10.55 o
   2   5   7     6.38     0.88     4.40 <
   4   5   7     2.60    -1.76     4.40 <
   5   5   7   256.83   269.03    13.19 o
   7   5   7    23.16    30.77     5.28 o
   8   5   7    11.40    21.98     5.28 o
   9   5   7    20.00    15.83     6.15 <
  10   5   7     1.24    -1.76     7.03 <
  -7   6   7    28.40    42.20     7.03 o
  -5   6   7     2.55    14.07     5.28 <
   1   6   7     7.73     0.00     4.40 <
   2   6   7   188.42   211.88     9.67 o
   4   6   7    33.73    -4.40     5.28 <
   5   6   7     3.84    -3.52     6.15 <
   6   6   7     8.62    11.43     7.03 <
   7   6   7     0.23    -2.64     6.15 <
   8   6   7    55.21    25.50     7.91 o
  -3   7   7    10.25     3.52     6.15 <
  -2   7   7   340.25   300.68    24.62 o
 -14   0   8    23.91     5.28     4.40 <
 -12   0   8 12359.80 15575.50   931.92 o
  -8   0   8 15921.20 18041.50  1078.75 o
  -6   0   8   653.33   572.34    26.38 o
  -4   0   8 33826.80 34244.70  1448.88 o
  -2   0   8 18237.70 19180.10   815.87 o
   0   0   8  3939.69  3719.79   159.13 o
   2   0   8 10563.40 11426.60   483.55 o
   4   0   8  4089.75  3868.37   165.29 o
   8   0   8   899.81   885.33    55.39 o
  10   0   8    14.60    28.13     7.91 o
  16   0   8  1819.57  2090.68   129.24 o
 -17   1   8     1.16     7.91     7.03 <
 -16   1   8     0.32     1.76     5.28 <
 -15   1   8   729.67   826.42    37.80 o
 -14   1   8   104.70    98.47     7.91 o
 -12   1   8   607.05   558.28    18.46 o
 -10   1   8   790.23   734.99    27.25 o
  -8   1   8  1087.86  1117.43    35.17 o
  -6   1   8   589.16   556.52    20.22 o
  -5   1   8 11747.80 11618.30   402.66 o
  -4   1   8   219.46   224.19     8.79 o
  -3   1   8  9160.19  9117.92   273.42 o
  -1   1   8 17253.10 18654.30   558.28 o
   0   1   8   235.31   232.10    16.70 o
   5   1   8  1206.39  1205.35    37.80 o
   6   1   8   165.24   158.25     7.03 o
   8   1   8   210.94   211.88    12.31 o
  10   1   8   491.47   462.45    16.70 o
  12   1   8   322.32   327.05    12.31 o
  14   1   8   164.23   160.89     8.79 o
  15   1   8   690.62   705.10    33.41 o
  16   1   8    12.81    19.34     7.91 <
 -17   2   8     2.29     2.64     6.15 <
 -15   2   8     9.17     7.03     6.15 <
 -14   2   8  2057.08  2264.75   138.91 o
 -13   2   8    45.13    48.35     7.03 o
 -11   2   8     1.49    -1.76     4.40 <
 -10   2   8 13606.70 14425.50   433.43 o
  -9   2   8     5.92     3.52     3.52 <
  -8   2   8  1276.82  1324.04    47.48 o
  -7   2   8    21.95    19.34     3.52 o
  -6   2   8  2045.14  2138.15    75.61 o
  -5   2   8     5.44     1.76     3.52 <
  -4   2   8  2129.02  2285.85    80.00 o
  -3   2   8     9.22    -2.64     3.52 <
  -2   2   8  3620.50  3824.41   116.05 o
  -1   2   8     2.46    14.07     4.40 o
   0   2   8  7050.40  8123.58   244.41 o
   1   2   8    15.71    23.74     4.40 o
   3   2   8   141.92   130.12     7.03 o
   5   2   8    10.11    11.43     4.40 <
   6   2   8     4.90     7.91     5.28 <
   7   2   8     5.51     7.91     5.28 <
   9   2   8    25.17    25.50     5.28 o
  11   2   8    39.77    44.84     5.28 o
  13   2   8     7.62     7.03     5.28 <
  14   2   8   117.14   113.41     7.91 o
  15   2   8     0.82    -7.91     7.03 <
 -17   3   8    19.78    18.46     7.03 <
 -16   3   8    40.60    41.32     7.03 o
 -15   3   8   118.74    80.88    10.55 o
 -14   3   8    42.18    45.72     7.03 o
 -13   3   8     2.04    15.83     7.91 <
 -12   3   8   171.82   211.88    13.19 o
 -11   3   8   134.35   119.57    10.55 o
 -10   3   8   319.27   355.19    14.95 o
  -9   3   8  2698.70  2887.21   108.14 o
  -8   3   8   601.98   634.76    21.10 o
  -7   3   8  9195.33  9261.23   405.30 o
  -5   3   8  4939.78  5544.08   193.42 o
  -4   3   8     4.04     1.76     4.40 <
   1   3   8   263.91   236.50    14.07 o
   2   3   8     1.02     3.52     5.28 <
   5   3   8     6.29    14.07     4.40 o
   6   3   8    36.92    52.75     7.91 o
   7   3   8  1048.40  1021.60    48.35 o
   8   3   8   192.88   218.91    11.43 o
   9   3   8    54.03    17.58     7.03 <
  10   3   8   329.82   364.86    19.34 o
  11   3   8   162.22   103.74   144.18 <
  12   3   8   274.79   305.07    14.07 o
 -16   4   8    12.74     2.64     8.79 <
 -15   4   8     0.11     5.28     6.15 <
 -14   4   8     2.78     6.15     6.15 <
 -13   4   8     3.06     1.76     9.67 <
 -11   4   8     2.55     0.00     7.03 <
 -10   4   8    98.87   134.51    11.43 o
  -9   4   8     1.91     4.40     4.40 <
  -7   4   8   102.03   116.93     7.03 o
  -6   4   8    98.93   116.93     7.91 o
  -5   4   8    91.92    85.28     7.03 o
  -4   4   8  7084.92  6261.48   189.90 o
  -3   4   8    10.17     0.88     4.40 <
  -2   4   8  3854.98  4095.20   125.72 o
  -1   4   8     5.34     0.00     4.40 <
   0   4   8   633.08   582.01    28.13 o
   1   4   8    52.49    39.56     5.28 o
   2   4   8  2752.61  2520.59    77.37 o
   3   4   8     0.12     0.88     5.28 <
   5   4   8    41.97    59.78     6.15 o
   6   4   8    55.19    27.25     7.91 o
   7   4   8    75.50    74.73     7.03 o
   9   4   8    32.13    44.84     5.28 o
  10   4   8    45.54    34.29     5.28 o
  11   4   8    24.77    25.50     6.15 o
 -11   5   8    39.05    32.53     9.67 o
 -10   5   8   234.23   267.27    15.83 o
  -9   5   8   915.59   829.94    38.68 o
  -8   5   8   206.33   218.91     9.67 o
  -7   5   8  1280.95  1397.01    44.84 o
  -6   5   8   181.50   202.21    10.55 o
  -5   5   8  2514.19  2412.46   105.50 o
  -4   5   8   112.44   140.67     8.79 o
  -3   5   8   314.36   331.45    13.19 o
  -1   5   8  2843.60  3136.90   112.53 o
   1   5   8    38.89    22.86     5.28 o
   2   5   8    68.80    95.83     7.91 o
   7   5   8    46.53    21.10     6.15 o
   8   5   8    78.82    46.60     8.79 o
   9   5   8   102.53    -3.52   275.18 <
  -7   6   8     3.17    -3.52     6.15 <
  -5   6   8    65.04    58.90     7.91 o
  -3   6   8   103.50   119.57     7.91 o
  -2   6   8   213.41   225.95    13.19 o
  -1   6   8    38.14    50.11     5.28 o
   0   6   8   492.36   507.28    18.46 o
   1   6   8     9.34     1.76     4.40 <
   2   6   8   216.10   254.96    10.55 o
   3   6   8    39.24    51.87     7.03 o
   4   6   8   177.54   163.53    11.43 o
   5   6   8     0.13     4.40     6.15 <
   6   6   8     2.18    -7.91     7.03 <
   7   6   8     0.53     6.15     6.15 <
 -14   0   9    24.81    33.41     6.15 o
 -12   0   9  4653.32  5057.89   215.40 o
 -10   0   9  1950.11  1891.11    81.76 o
  -4   0   9 21109.50 23073.90   977.64 o
  -2   0   9  8672.07  8571.08   365.74 o
   4   0   9  6288.93  6848.77   291.01 o
   8   0   9  1328.70  1473.50    64.18 o
  14   0   9   616.36   638.28    43.08 o
 -16   1   9   459.55   419.37    21.10 o
 -14   1   9   140.59   143.30    10.55 o
 -12   1   9   250.47   218.04    10.55 o
 -10   1   9     1.50     0.00     3.52 <
  -9   1   9   720.19   800.05    29.89 o
  -8   1   9    12.60    16.70     3.52 o
  -4   1   9    81.69    78.25     4.40 o
  -2   1   9     2.36     1.76     3.52 <
   0   1   9   263.35   250.57     9.67 o
   1   1   9  6453.78  7187.25   215.40 o
   2   1   9   440.37   471.24    15.83 o
   4   1   9   672.03   743.78    34.29 o
   6   1   9   466.91   519.59    24.62 o
   8   1   9   360.55   351.67    14.95 o
  10   1   9    46.77    38.68     5.28 o
  11   1   9  1920.01  1979.02    61.54 o
  12   1   9     7.85     4.40     4.40 <
  13   1   9  2144.69  2079.25    74.73 o
  14   1   9     8.33     2.64     6.15 <
  15   1   9   271.70   274.30    13.19 o
  16   1   9    31.14    18.46     9.67 <
 -17   2   9     0.52     7.03     6.15 <
 -16   2   9     3.28     7.91     6.15 <
 -15   2   9     1.24     5.28     5.28 <
 -14   2   9  2452.28  3120.19   191.66 o
 -13   2   9    34.62    12.31     6.15 <
 -12   2   9    21.47    39.56    11.43 o
 -11   2   9    23.52    19.34     4.40 o
  -9   2   9    36.61    22.86     4.40 o
  -8   2   9  2130.04  1966.71    98.47 o
  -7   2   9     0.11    -0.88     3.52 <
  -5   2   9     0.91     1.76     3.52 <
  -4   2   9  2243.86  2031.77    62.42 o
  -3   2   9   204.94   175.84     7.91 o
  -1   2   9    51.59    54.51     5.28 o
   1   2   9   119.87   112.53     6.15 o
   3   2   9     1.65    -5.28     5.28 <
   5   2   9    31.07    15.83     7.91 <
   6   2   9   433.44   413.21    14.95 o
   7   2   9    42.57    32.53     6.15 o
   9   2   9     9.67     8.79     5.28 <
  10   2   9  1986.26  1916.60    69.45 o
  11   2   9    23.80    15.83     5.28 <
  13   2   9    11.94     5.28     5.28 <
  14   2   9    19.07     9.67     7.03 <
 -16   3   9    92.22   123.08    10.55 o
 -14   3   9   289.19   267.27    21.98 o
 -13   3   9    66.12    68.58    13.19 o
 -12   3   9    87.68   109.02     9.67 o
 -11   3   9   220.65   201.33    13.19 o
 -10   3   9    55.30    41.32     6.15 o
  -9   3   9   153.17   139.79     7.91 o
  -8   3   9    33.51    28.13     4.40 o
  -7   3   9     5.75     7.91     4.40 <
  -6   3   9     6.46     2.64     4.40 <
  -5   3   9    72.87    72.97     6.15 o
  -4   3   9    56.57    60.66     5.28 o
  -3   3   9   490.09   478.27    23.74 o
  -2   3   9     0.10    -3.52     5.28 <
  -1   3   9   104.81    79.13     9.67 o
   0   3   9     0.47     3.52     6.15 <
   2   3   9   808.34   883.57    30.77 o
   6   3   9   904.22   998.74    37.80 o
   9   3   9     0.70    -5.28     6.15 <
  10   3   9   167.42   167.92     8.79 o
  11   3   9   614.84   207.49   201.33 <
  12   3   9     3.12     3.52     5.28 <
 -15   4   9    16.20    24.62     8.79 <
 -14   4   9    44.95     1.76     6.15 <
 -13   4   9     0.15     5.28     6.15 <
 -11   4   9   121.14   133.63    10.55 o
 -10   4   9   347.44   282.21    20.22 o
  -9   4   9     1.35    -2.64     4.40 <
  -7   4   9    19.69    16.70     4.40 o
  -5   4   9    68.91    76.49     6.15 o
  -4   4   9  4485.30  4249.05   138.03 o
  -3   4   9   156.15   155.61     7.91 o
  -2   4   9  3024.11  3331.19   109.02 o
  -1   4   9    31.06    29.01     5.28 o
   1   4   9     5.75    11.43     5.28 <
   2   4   9  1220.77  1067.32    34.29 o
   3   4   9    29.38    20.22     5.28 o
   5   4   9     2.92    -3.52     5.28 <
   7   4   9    18.31    22.86     6.15 o
   9   4   9    12.96    12.31     5.28 <
  10   4   9    18.40    29.01     9.67 <
  11   4   9     4.74     7.91     7.03 <
 -10   5   9     5.19     8.79     7.91 <
  -8   5   9     8.41    11.43     4.40 <
  -7   5   9    78.80    73.85     6.15 o
  -5   5   9     0.59    -4.40     5.28 <
  -4   5   9     2.20     2.64     4.40 <
  -3   5   9   401.01   342.00    15.83 o
  -2   5   9    10.06    13.19     5.28 <
  -1   5   9   254.01   269.91    13.19 o
   0   5   9   355.28   382.44    17.58 o
   1   5   9   602.44   545.09    28.13 o
   2   5   9    82.22    75.61     7.91 o
   3   5   9   429.73   392.11    18.46 o
   4   5   9   239.12   223.31    11.43 o
   5   5   9   123.97   140.67     7.91 o
   6   5   9    98.68    80.00     7.91 o
   7   5   9    53.22    20.22    19.34 <
   9   5   9    60.96    36.93     8.79 o
  -6   6   9     4.25     0.88     7.03 <
  -5   6   9    23.72    16.70     9.67 <
  -4   6   9   139.24   154.74    14.95 o
  -3   6   9    81.52   119.57    14.95 o
  -2   6   9   295.69   260.24    22.86 o
  -1   6   9    16.69    14.07     6.15 <
   1   6   9    51.58    58.90     7.91 o
   2   6   9   117.92     3.52    12.31 <
   3   6   9     3.07     0.00     7.91 <
 -14   0  10  1030.46  1227.33    54.51 o
 -12   0  10     5.04    10.55     5.28 <
  -8   0  10    14.74    14.07     5.28 <
  -4   0  10  9516.66 10394.50   441.35 o
   0   0  10   359.63   336.72    16.70 o
   4   0  10  9296.05 10285.50   436.95 o
   6   0  10  6127.90  6438.20   273.42 o
   8   0  10  2217.98  2008.91    87.04 o
  12   0  10  2031.85  2081.89   127.48 o
 -16   1  10     0.45     1.76    10.55 <
 -15   1  10  4955.88  5831.57   351.67 o
 -14   1  10    24.78    32.53     9.67 o
 -13   1  10   799.90   746.42    40.44 o
 -12   1  10    63.10    65.06     6.15 o
 -10   1  10    83.59    84.40     5.28 o
  -9   1  10   169.41   186.38     8.79 o
  -8   1  10     0.98     1.76     3.52 <
  -6   1  10   131.42   126.60     6.15 o
  -4   1  10   557.30   582.01    19.34 o
  -2   1  10   807.74   853.68    27.25 o
   0   1  10   700.82   757.85    28.13 o
   1   1  10  6031.84  7254.95   308.59 o
   2   1  10   296.98   289.25    10.55 o
   3   1  10  2806.18  3130.74   109.90 o
   4   1  10    49.42    43.96     6.15 o
   5   1  10  1305.40  1284.47    46.60 o
   6   1  10     9.30     6.15     3.52 <
   8   1  10   105.32   111.65     7.03 o
   9   1  10  4126.13  4344.88   131.88 o
  10   1  10    15.74    13.19     5.28 <
  11   1  10  1156.20  1084.90    39.56 o
  12   1  10     1.03    -4.40     4.40 <
  13   1  10   391.06   382.44    15.83 o
  14   1  10     9.68    -3.52     5.28 <
 -16   2  10   123.49   103.74    14.95 o
 -15   2  10     0.17     3.52     6.15 <
 -13   2  10     1.69    -0.88     6.15 <
 -11   2  10     0.07     0.88     4.40 <
 -10   2  10  1637.14  1562.29    49.23 o
  -9   2  10    53.20    39.56     5.28 o
  -8   2  10  1067.38  1068.20    38.68 o
  -7   2  10    22.55    18.46     3.52 o
  -6   2  10   198.25   190.78     8.79 o
  -5   2  10     0.59    -1.76     3.52 <
  -4   2  10   110.47   115.17     6.15 o
  -3   2  10    48.99    34.29     4.40 o
  -1   2  10    48.24    27.25     6.15 o
   1   2  10     4.98    -2.64     4.40 <
   3   2  10     2.64    -0.88     4.40 <
   4   2  10 10572.00 11933.00   360.46 o
   5   2  10    28.66    35.17     5.28 o
   7   2  10    14.51     9.67     5.28 <
   9   2  10     0.05    -0.88     5.28 <
  10   2  10   498.33   474.75    17.58 o
  11   2  10     8.11    -7.03     5.28 <
  13   2  10     1.47    -7.03     5.28 <
 -16   3  10    14.70    12.31     6.15 <
 -14   3  10    34.72    46.60    11.43 o
 -12   3  10    45.88    44.84    14.95 <
 -10   3  10     5.49     7.91     4.40 <
  -9   3  10    25.45    21.98     4.40 o
  -8   3  10    73.35    68.58     5.28 o
  -7   3  10     0.15    45.72   131.00 <
  -6   3  10   100.89   112.53     7.91 o
  -4   3  10   521.79   530.14    18.46 o
   4   3  10    50.47    53.63     6.15 o
   6   3  10    20.10    12.31     5.28 <
   7   3  10   707.32   580.26    28.13 o
   8   3  10    13.97    21.98     6.15 o
   9   3  10  2275.59  1745.16   203.97 o
  10   3  10    15.03    16.70     5.28 o
  12   3  10    28.39     3.52     7.03 <
 -13   4  10    14.04     5.28     6.15 <
 -12   4  10    19.88     8.79     8.79 <
 -11   4  10     0.09     0.00     6.15 <
 -10   4  10    80.36    59.78     7.91 o
  -9   4  10     0.70     3.52     4.40 <
  -8   4  10    32.71    14.95     5.28 <
  -7   4  10     4.68     5.28     4.40 <
  -6   4  10  1295.22  1264.25    47.48 o
  -5   4  10    16.10    18.46     5.28 o
  -4   4  10  3678.97  4024.86   244.41 o
  -3   4  10   283.62   316.50    13.19 o
  -2   4  10   773.06   727.08    24.62 o
  -1   4  10     1.50     2.64     5.28 <
   1   4  10    79.75    80.88     7.03 o
   3   4  10   106.39   110.78     7.91 o
   4   4  10  3408.21  3560.66   152.10 o
   5   4  10    25.33    22.86     6.15 o
   6   4  10  1411.77  1188.64    54.51 o
   7   4  10     4.69    -4.40     5.28 <
   9   4  10     2.78     1.76     7.03 <
  11   4  10     1.05    -7.03     7.03 <
  -8   5  10     0.42     0.88     5.28 <
  -6   5  10   108.27   132.76     7.91 o
  -5   5  10    52.51    36.05     6.15 o
  -4   5  10   269.63   286.61    14.07 o
  -3   5  10    26.60    29.01     7.03 o
  -2   5  10   290.82   288.37    14.07 o
  -1   5  10   795.03   658.50    31.65 o
   0   5  10   183.79   157.37     8.79 o
   1   5  10   814.15   771.04    29.89 o
   2   5  10   157.84   160.89     8.79 o
   4   5  10    53.53    38.68     6.15 o
   5   5  10    70.52    63.30     7.91 o
   6   5  10     3.44    -4.40     7.03 <
   8   5  10    32.01    30.77     7.91 o
  -5   6  10     4.46    -1.76     7.03 <
  -1   6  10    18.94    10.55     9.67 <
 -14   0  11  1816.65  1954.41    85.28 o
 -12   0  11   416.17   422.00    21.10 o
   0   0  11    29.44    43.96     7.03 o
   2   0  11   639.49   676.09    36.05 o
   6   0  11     8.80     7.03     5.28 <
   8   0  11   808.36   924.01    41.32 o
 -16   1  11    19.86    24.62    12.31 <
 -15   1  11    40.40    47.48    11.43 o
 -14   1  11     0.04    -2.64     9.67 <
 -13   1  11   850.54   939.84    50.99 o
 -12   1  11   146.01   113.41     8.79 o
 -10   1  11   353.64   334.09    12.31 o
  -8   1  11   582.53   552.12    18.46 o
  -6   1  11   273.48   305.07    11.43 o
  -4   1  11   256.06   254.96     9.67 o
  -3   1  11  2521.30  2608.51    92.31 o
  -2   1  11    11.48     9.67     4.40 <
   0   1  11     0.68   -11.43     4.40 <
   1   1  11  1572.20  1588.67    56.27 o
   2   1  11    99.80    99.35     5.28 o
   3   1  11  2771.90  3134.26    94.95 o
   4   1  11    28.69    25.50     3.52 o
   5   1  11   279.18   246.17     9.67 o
   6   1  11     6.80     4.40     3.52 <
   8   1  11   121.44   109.02     7.91 o
   9   1  11  2101.42  2479.27   107.26 o
  10   1  11    64.59    72.97     5.28 o
  12   1  11   235.42   207.49    11.43 o
  14   1  11   144.62   116.93    14.07 o
 -15   2  11     0.82     3.52     7.03 <
 -13   2  11     1.57     5.28     6.15 <
 -12   2  11  1937.10  1887.59    73.85 o
 -11   2  11    19.86     9.67     4.40 <
  -9   2  11    35.01    24.62     4.40 o
  -8   2  11  2507.75  2780.83    85.28 o
  -7   2  11     6.44     3.52     4.40 <
  -6   2  11  5476.87  6030.26   181.99 o
  -5   2  11    50.33    45.72     4.40 o
  -4   2  11   872.82   788.62    29.89 o
  -3   2  11     1.36     2.64     3.52 <
  -2   2  11  2165.98  2280.58    69.45 o
   1   2  11    14.94     6.15     4.40 <
   2   2  11   267.06   265.51    12.31 o
   3   2  11    92.35    75.61     6.15 o
   5   2  11    35.05    20.22     5.28 o
   6   2  11     8.57   -21.10     6.15 <
   9   2  11     1.43    -8.79     6.15 <
  10   2  11  3512.15  3599.34   127.48 o
  11   2  11     0.16     7.03     5.28 <
  12   2  11  1392.99  1252.82    57.15 o
  13   2  11    19.44    11.43     7.03 <
 -16   3  11     5.52     7.91     6.15 <
 -14   3  11    56.06    55.39     7.91 o
 -12   3  11    23.46    40.44    11.43 o
 -10   3  11   246.12   238.26    11.43 o
  -9   3  11     4.31   101.98   150.34 <
  -8   3  11   316.42   365.74    14.07 o
  -6   3  11  1036.72  1047.10    39.56 o
  -4   3  11   160.94   174.96     8.79 o
  -3   3  11  2189.71  2526.75    78.25 o
  -2   3  11    58.20    78.25     7.91 o
   0   3  11   144.05   119.57     7.91 o
   2   3  11     1.74     7.03     5.28 <
   3   3  11   943.63   858.95    33.41 o
   4   3  11    88.98    80.88     7.03 o
   6   3  11     3.86    -1.76     7.03 <
   8   3  11     6.97     7.03     6.15 <
   9   3  11  1397.25   633.01  1115.67 <
 -12   4  11    18.72     9.67     7.91 <
 -11   4  11     0.03    -1.76     6.15 <
  -9   4  11     6.25     2.64     4.40 <
  -8   4  11  1077.04   611.91   168.80 o
  -7   4  11    17.38    21.10     5.28 o
  -5   4  11     6.88     8.79     5.28 <
  -4   4  11  1118.57   969.73    31.65 o
  -3   4  11   172.74   180.23    13.19 o
  -1   4  11    22.39    24.62     7.03 o
   0   4  11     4.85    -4.40     8.79 <
   1   4  11    16.97    14.95     7.03 <
   3   4  11    28.55    28.13     6.15 o
   4   4  11   166.99   140.67     9.67 o
   5   4  11     5.95    10.55     5.28 <
   6   4  11     0.71    -0.88     7.91 <
   7   4  11    51.04    51.87    12.31 o
   9   4  11    20.73    27.25    10.55 <
  10   4  11   101.58    -8.79     7.91 <
  -6   5  11     8.78     2.64     7.03 <
  -5   5  11    32.51    29.01     6.15 o
  -4   5  11   135.42   123.96    10.55 o
  -2   5  11     4.25     4.40     5.28 <
  -1   5  11   884.03   837.85    40.44 o
   0   5  11    38.96    47.48     6.15 o
   1   5  11   242.96   215.40    21.10 o
   2   5  11    69.92    63.30     7.03 o
   4   5  11     0.85    -1.76     8.79 <
  -4   6  11    22.23    26.38    10.55 <
  -3   6  11     0.11    -3.52     7.91 <
 -10   0  12  2669.45  2756.21   118.69 o
  -8   0  12  3387.80  3653.85   156.49 o
  -6   0  12  3150.74  3347.90   143.30 o
  -4   0  12  4367.21  3683.74   223.31 o
  -2   0  12  9183.52  9672.68   412.33 o
   0   0  12  1665.84  1516.58    66.82 o
   2   0  12  1509.25  1753.95   107.26 o
  12   0  12  2322.97  2764.13   169.68 o
 -14   1  12   295.38   301.56    17.58 o
 -12   1  12   147.31   147.70     7.91 o
 -11   1  12  1990.21  1925.39    58.90 o
 -10   1  12   107.23   103.74     7.03 o
  -9   1  12  2979.83  3165.91    95.83 o
  -8   1  12     2.35     3.52     5.28 <
  -7   1  12  4713.65  5012.18   174.96 o
  -6   1  12     3.10     2.64     3.52 <
  -4   1  12    81.93    64.18     5.28 o
  -2   1  12    40.73    31.65     3.52 o
  -1   1  12   358.59   347.27    12.31 o
   0   1  12     4.53     0.88     3.52 <
   1   1  12  2694.54  2988.32   104.62 o
   2   1  12   128.52   119.57     6.15 o
   4   1  12   395.96   416.73    16.70 o
   6   1  12   356.07   391.23    15.83 o
   8   1  12   371.23   366.62    15.83 o
  10   1  12   195.94   204.85     9.67 o
  12   1  12    55.56    29.89     8.79 o
 -15   2  12     1.30    -2.64     7.03 <
 -14   2  12    96.76   104.62    10.55 o
 -13   2  12    66.66    50.11    10.55 o
 -11   2  12    45.78    41.32     5.28 o
 -10   2  12  9440.27 10598.50   320.02 o
  -9   2  12     2.56     3.52     4.40 <
  -8   2  12  5148.42  5311.97   173.20 o
  -7   2  12     8.02     7.03     4.40 <
  -5   2  12    21.02    12.31     4.40 <
  -2   2  12  2853.91  2994.47    91.43 o
  -1   2  12     1.29   -18.46     4.40 <
   0   2  12   148.92   168.80     8.79 o
   1   2  12    13.55     7.91     4.40 <
   2   2  12    52.67    53.63     5.28 o
   3   2  12     0.05    -0.88     4.40 <
   5   2  12     5.96    15.83     7.91 <
   6   2  12  2291.97  2514.44    77.37 o
   7   2  12     0.41    -8.79     6.15 <
   9   2  12     0.87    -0.88     5.28 <
  11   2  12     1.39    -0.88     6.15 <
 -14   3  12   176.58   173.20    12.31 o
 -12   3  12   157.23   145.94    11.43 o
 -10   3  12   137.92   118.69     7.03 o
  -8   3  12     1.95     8.79     5.28 <
  -7   3  12  3716.87  3873.64   138.03 o
  -6   3  12    60.72    53.63     6.15 o
  -5   3  12  1835.06  1761.87    69.45 o
  -4   3  12    81.09   101.11     7.91 o
  -2   3  12     0.95     7.03     6.15 <
  -1   3  12   217.57   205.73    11.43 o
   0   3  12     3.02    -1.76     5.28 <
   1   3  12  1266.21   998.74    67.70 o
   2   3  12    13.40    20.22     5.28 o
   3   3  12  1272.02  1241.39    60.66 o
   4   3  12   275.13   303.32    14.95 o
   5   3  12    99.17   153.86    20.22 o
   6   3  12   231.11   240.89    14.95 o
   7   3  12    20.59    30.77    14.95 <
   9   3  12    65.64     9.67    15.83 <
  10   3  12    15.55    13.19     8.79 <
  -9   4  12    52.93    31.65     5.28 o
  -7   4  12    78.08    78.25     6.15 o
  -6   4  12   946.77   998.74    37.80 o
  -5   4  12     0.55     2.64     4.40 <
  -4   4  12   894.76   881.81    41.32 o
  -2   4  12  2942.23  2836.22   110.78 o
  -1   4  12     0.91    15.83     6.15 <
   1   4  12    15.31    13.19     6.15 <
   3   4  12    21.44    17.58     5.28 o
   4   4  12   217.51   171.44    29.01 o
   5   4  12    25.28    21.98     7.03 o
   7   4  12     2.81   -31.65     9.67 <
  -7   5  12   657.01   363.98  1146.44 <
  -6   5  12     4.59     0.00     7.03 <
  -5   5  12   744.30   772.79    51.87 o
  -4   5  12    20.02    28.13     7.91 o
  -3   5  12    44.25    45.72     8.79 o
  -2   5  12    50.51    63.30    14.07 o
  -1   5  12     8.25    11.43     7.91 <
   0   5  12     0.58   -14.95    11.43 <
 -14   0  13   245.49   223.31    14.95 o
 -12   0  13   146.78   156.49    10.55 o
  -8   0  13   143.73   137.15     9.67 o
  -6   0  13    96.32    91.43     7.91 o
   0   0  13    25.02    14.95     5.28 <
   8   0  13   202.41   203.09    11.43 o
  10   0  13  3066.22  3273.17   198.69 o
 -14   1  13     0.06     5.28     6.15 <
 -13   1  13   178.74   156.49    11.43 o
 -12   1  13     7.47     9.67     5.28 <
 -11   1  13   935.95   925.77    29.89 o
 -10   1  13    23.64    20.22     5.28 o
  -8   1  13     5.49     6.15     3.52 <
  -7   1  13   265.18   243.53    10.55 o
  -6   1  13     3.10     3.52     3.52 <
  -4   1  13   218.75   189.90     7.91 o
  -2   1  13   416.31   429.04    14.95 o
   0   1  13   648.92   608.39    20.22 o
   2   1  13   329.26   342.00    14.95 o
   4   1  13   198.97   206.61     9.67 o
   5   1  13   851.69   894.12    33.41 o
   6   1  13    29.74    36.05     4.40 o
   7   1  13  1637.80  1716.15    52.75 o
   8   1  13     1.20     3.52     4.40 <
   9   1  13   265.24   230.34    11.43 o
  10   1  13    54.75    21.98     7.91 <
 -15   2  13     0.25     0.88     6.15 <
 -13   2  13     7.82    -2.64     7.03 <
 -12   2  13   862.55   868.63    42.20 o
 -11   2  13     0.22     0.88     5.28 <
 -10   2  13  1881.30  1870.88    82.64 o
  -7   2  13     7.75     7.91     4.40 <
  -6   2  13    47.87    51.87     5.28 o
  -5   2  13     1.31    -3.52     4.40 <
  -4   2  13   879.22   982.92    31.65 o
  -3   2  13    20.12    15.83     4.40 o
  -2   2  13   339.89   297.16    17.58 o
  -1   2  13     3.95    -9.67     4.40 <
   1   2  13     5.58     2.64     5.28 <
   2   2  13  1746.26  1911.33    63.30 o
   3   2  13     3.33    -1.76     6.15 <
   5   2  13    10.37     0.88     5.28 <
   6   2  13  1540.15  1533.28    48.35 o
   9   2  13     0.73     1.76     7.91 <
 -13   3  13    18.42     0.00     9.67 <
 -12   3  13   124.39   107.26     9.67 o
 -11   3  13   786.64   798.29    37.80 o
 -10   3  13    29.41    29.89     5.28 o
  -9   3  13   603.68   602.23    26.38 o
  -8   3  13    76.55    77.37     6.15 o
  -7   3  13   168.12   144.18     7.91 o
  -6   3  13    75.80    60.66     6.15 o
  -4   3  13    15.73    24.62     6.15 o
  -2   3  13   204.77   203.97    11.43 o
   0   3  13   151.76   166.16     8.79 o
   2   3  13   468.94   456.29    20.22 o
   4   3  13    27.99    32.53     6.15 o
   6   3  13    12.39     0.88     7.03 <
  -8   4  13   125.49    97.59    12.31 o
  -7   4  13     6.80     5.28     5.28 <
  -6   4  13    79.79    44.84    26.38 <
  -5   4  13    19.85    22.86     7.91 <
  -4   4  13   377.55   364.86    27.25 o
  -1   4  13    72.92    76.49     7.03 o
   0   4  13     5.64     6.15     6.15 <
   1   4  13    46.72    58.90     7.03 o
   3   4  13    14.56     4.40     7.91 <
  -6   5  13    20.41    21.98    10.55 <
  -3   5  13    95.50    58.90    13.19 o
  -2   5  13   131.19    84.40    16.70 o
 -12   0  14   224.73   247.05    14.07 o
 -10   0  14    21.66    11.43     5.28 <
   0   0  14  8463.88  8571.96   364.86 o
   2   0  14  6682.57  6924.38   295.40 o
   4   0  14  2672.16  2403.66   103.74 o
   6   0  14  4216.94  4659.63   198.69 o
 -14   1  14     1.55    -7.03     7.03 <
 -12   1  14     5.19     5.28     4.40 <
 -11   1  14   341.18   402.66    20.22 o
 -10   1  14   125.96   106.38     7.03 o
  -8   1  14   280.18   247.93    11.43 o
  -6   1  14   435.49   396.51    16.70 o
  -4   1  14   264.61   268.15    12.31 o
  -2   1  14   163.94   136.27     7.03 o
   0   1  14    19.10    16.70     4.40 o
   1   1  14  1172.52  1119.19    41.32 o
   2   1  14     0.89     0.88     3.52 <
   3   1  14  4888.68  4907.55   148.58 o
   4   1  14    25.90    21.98     4.40 o
   5   1  14   819.37   932.80    29.89 o
 -14   2  14    36.72     2.64     6.15 <
 -13   2  14     0.60    -3.52     7.03 <
 -12   2  14   667.74   750.82    47.48 o
 -11   2  14     7.64     9.67     5.28 <
 -10   2  14   478.56   538.93    21.98 o
  -9   2  14    46.29    28.13     4.40 o
  -7   2  14     3.30     5.28     3.52 <
  -6   2  14    90.88    74.73     5.28 o
  -5   2  14     1.36    -5.28     4.40 <
  -2   2  14  3446.78  3589.67   109.02 o
  -1   2  14     0.70    -3.52     4.40 <
   0   2  14  1342.47  1206.23    54.51 o
   1   2  14     0.79    -3.52     4.40 <
   2   2  14   579.23   543.33    19.34 o
   3   2  14     1.77     2.64     4.40 <
   4   2  14  1380.36  1455.03    45.72 o
   5   2  14     5.43     7.91     6.15 <
 -10   3  14    68.45    65.06    11.43 o
  -9   3  14    79.52   112.53     9.67 o
  -8   3  14   167.89   174.96     8.79 o
  -7   3  14   265.23   344.64    28.13 o
  -6   3  14   190.63   189.02     9.67 o
  -4   3  14   195.31   168.80    11.43 o
  -3   3  14   448.27   431.67    40.44 o
  -2   3  14    66.71    75.61     7.03 o
  -1   3  14     4.92     5.28     5.28 <
   0   3  14    10.81     7.91     5.28 <
   2   3  14    51.51    50.11     7.91 o
   4   3  14    11.22     0.00     7.91 <
  -7   4  14     9.59    19.34     7.03 <
  -5   4  14     1.73   -11.43     7.91 <
  -3   4  14     2.95    12.31     7.91 <
  -1   4  14    24.70     0.88    12.31 <
 -10   0  15   545.45   618.06    29.89 o
  -8   0  15     1.92     1.76     5.28 <
  -6   0  15   206.01   184.63    12.31 o
  -4   0  15  1713.09  1512.18    94.07 o
   0   0  15    10.00     7.91     5.28 <
   2   0  15  1415.92  1414.59    62.42 o
   4   0  15  2260.75  2665.66   162.65 o
 -13   1  15  2305.69  2613.79   114.29 o
 -12   1  15   298.54   245.29    14.95 o
 -10   1  15   126.31   115.17     7.03 o
  -8   1  15    64.11    42.20     5.28 o
  -7   1  15   784.02   722.68    27.25 o
  -6   1  15     4.48     2.64     3.52 <
  -5   1  15  1317.45  1427.78    44.84 o
  -4   1  15    10.74    15.83     5.28 <
  -3   1  15   476.89   568.83    22.86 o
  -1   1  15   176.29   189.02     7.91 o
   0   1  15     7.57     9.67     3.52 <
   2   1  15     0.06    -3.52     3.52 <
   3   1  15   753.20   749.06    24.62 o
   4   1  15    99.59    66.82     9.67 o
 -12   2  15   115.68   109.90    14.95 o
 -11   2  15     0.38     9.67     9.67 <
 -10   2  15   623.71   634.76    25.50 o
  -9   2  15    14.30     7.91     4.40 <
  -8   2  15  1198.57  1227.33    55.39 o
  -7   2  15    18.08     9.67     4.40 <
  -5   2  15     3.33    -0.88     4.40 <
  -4   2  15   312.30   312.99    13.19 o
  -3   2  15     8.66     6.15     3.52 <
  -2   2  15    20.93    14.95     4.40 o
  -1   2  15    19.95     3.52     4.40 <
   0   2  15    39.66    22.86     5.28 o
   1   2  15    31.79    33.41     5.28 o
   2   2  15  1752.64  1550.86    69.45 o
   3   2  15    22.82     9.67     9.67 <
  -8   3  15    19.97    17.58     8.79 <
  -6   3  15    29.73    33.41     8.79 o
  -5   3  15   621.09   529.26    28.13 o
  -4   3  15    33.70    32.53     8.79 o
  -3   3  15   256.91   344.64    28.13 o
  -2   3  15     3.36    -0.88     9.67 <
   0   3  15     8.78    21.98    14.07 <
  -6   4  15    67.18    38.68   111.65 <
  -5   4  15    13.72     7.91     8.79 <
  -6   0  16  1165.86  1287.11    66.82 o
  -4   0  16    20.17    25.50     6.15 o
  -2   0  16   322.57   315.62    16.70 o
   0   0  16  2656.27  2778.19   168.80 o
 -12   1  16     1.92     7.91     9.67 <
 -11   1  16  1867.41  2087.16   181.99 o
 -10   1  16    36.50    36.93     5.28 o
  -9   1  16   183.41   172.32     7.91 o
  -8   1  16     9.65    12.31     4.40 <
  -7   1  16  1005.67   949.51    38.68 o
  -6   1  16    14.78     4.40     4.40 <
  -5   1  16  4601.77  4527.75   137.15 o
  -4   1  16     2.20     4.40     4.40 <
  -3   1  16  2799.05  2741.27    83.52 o
  -2   1  16    63.44    50.99     5.28 o
  -9   2  16     0.00     1.76     6.15 <
  -8   2  16  2537.16  2819.51   123.08 o
  -7   2  16     2.59     7.91     6.15 <
  -5   2  16     7.71     4.40     5.28 <
  -4   2  16    69.59    64.18     7.03 o
  -3   2  16    10.12     3.52     7.03 <
  -2   2  16   849.58  1070.84    69.45 o
  -1   2  16    13.52     7.91     8.79 <
  -6   3  16     9.50     4.40     7.91 <
  -5   3  16  2992.75  2602.36   165.29 o
  -4   3  16    55.45    34.29    15.83 <
 -10   0  17    10.35     8.79     8.79 <
  -8   0  17    14.46    -9.67     8.79 <
  -6   0  17  2314.50  1735.49   153.86 o
  -9   1  17   627.36   597.84    42.20 o
  -8   1  17    86.90    76.49    13.19 o
  -6   1  17   133.04   122.21    14.95 o
  -5   1  17   655.13   609.27    43.08 o
  -8   2  17   130.32   136.27    16.70 o
  -7   2  17     9.72    15.83    10.55 <

loop_
 _twin_refln_datum_id
 _twin_refln_individual_id
 _twin_refln_index_h
 _twin_refln_index_k
 _twin_refln_index_l
 _twin_refln_F_squared_calc
 _twin_refln_F_squared_meas
 _twin_refln_F_squared_sigma
 _twin_refln_include_status
 ? ? ? ? ? ? ? ? ?
